# Supplementary material for: Acute sleep fragmentation does not alter pro-inflammatory cytokine gene expression in brain or peripheral tissues of leptin-deficient mice
Source: PeerJ. 2018 Feb 19;6:e4423. doi: 10.7717/peerj.4423 (PMC5822834; doi:10.7717/peerj.4423)
Supplement: Supplemental Information 1 [file peerj-06-4423-s001.xlsx]

## Sheet: Jennie OB Heart TNFa Study 12.9
Plate Name: Jennie OB Heart TNFa Plate 12.8.
Detector	Reporter		Start	End	Threshold							TNFa
TNF-mouse	FAM		3	15	0.2							std1	5	27.8451
Well	SampleName		Ct	Average CT	x for TNFa	x for 18s		relative expression				std2	0.5	31.1987
1	S1		28.255	27.8451	4.94236	4.97749		0.992943				std3	0.05	34.9132
2	S1		27.4351									std4	0.005	38.1761
3	1	OBSD H1	33.0718	32.7981	0.184738	43.8108		0.00421671				std5	0.0005
4	1	OBSD H1	32.5243
5	2	OBSD H2	32.805	32.8175	0.182363	43.6033		0.00418231
6	2	OBSD H2	32.8301
7	3	OBSD H3	32.6522	32.3401	0.25034	44.2708		0.00565473
8	3	OBSD H3	32.028
9	4	OBSD H4	33.7409	33.9295	0.0871944	47.3725		0.00184061
10	4	OBSD H4	34.1181
11	5	OBSD H5	33.5733	33.7014	0.101447	44.6839		0.00227032
12	5	OBSD H5	33.8294
13	S2		31.9839	31.1987	0.533922	0.639011		0.835545
14	S2		30.4134
15	6	OBSD H7	32.1746	32.1458	0.284789	44.4248		0.00641059
16	6	OBSD H7	32.117
17	7	OBSD H8	32.8773	32.837	0.180018	45.117		0.00399003
18	7	OBSD H8	32.7968
19	8	OBSD H9	33.2055	33.1273	0.148481	45.9983		0.00322796
20	8	OBSD H9	33.0491
21	9	OBC H1	31.6865	31.6071	0.40715	39.1914		0.0103888
22	9	OBC H1	31.5278
23	10	OBC H2	32.2989	32.2472	0.266266	40.7074		0.00654098
24	10	OBC H2	32.1954
25	S3		35.7701	34.9132	0.0453928	0.0332221		1.36634
26	S3		34.0564
27	11	OBC H3	32.0344	31.9992	0.313886	43.1592		0.00727274
28	11	OBC H3	31.964
29	12	OBC H4	33.3497	32.9594	0.165986	33.3799		0.00497264
30	12	OBC H4	32.569
31	13	OBC H5	31.2692	31.0419	0.592429	44.7184		0.013248
32	13	OBC H5	30.8147
33	14	OBC H6	32.0252	31.8239	0.352618	40.7062		0.00866253
34	14	OBC H6	31.6225
35	15	OBC H7	33.3423	33.2107	0.140492	17.0094		0.00825962
36	15	OBC H7	33.079
37	S4		38.1761	38.1761	0.00520815	0.00553854		0.940346
38	S4
39	16	OBC H8	31.1347	31.0936	0.572488	43.9241		0.0130336
40	16	OBC H8	31.0524
41	17	OBC H9	32.1221	31.8566	0.345049	23.0429		0.0149742
42	17	OBC H9	31.591
43	18	SD1 H1	32.7625	32.4389	0.234454	42.058		0.00557453
44	18	SD1 H1	32.1153
45	19	SD1 H2	32.7997	32.47	0.229665	30.8638		0.00744123
46	19	SD1 H2	32.1403
47	20	SD1 H3	30.6766	30.4367	0.885268	46.2214		0.0191528
48	20	SD1 H3	30.1967
49	S5					0.000535275
50	S5
51	21	SD1 H4	30.9054	30.7384	0.724628	37.2071		0.0194756
52	21	SD1 H4	30.5714
53	22	C2 H1	31.4544	31.2645	0.511077	36.1396		0.0141418
54	22	C2 H1	31.0747
55	23	C2 H2	30.1117	29.9956	1.1863	49.0417		0.0241896
56	23	C2 H2	29.8794
57	24	C2 H3	30.8198	30.8082	0.691854	45.3465		0.0152571
58	24	C2 H3	30.7965
59	25	C2 H4	30.4347	30.2484	1.00309	47.4034		0.0211607
60	25	C2 H4	30.062
61	26	SD3 H1	33.6547	33.0506	0.156234	16.8517		0.00927109
62	26	SD3 H1	32.4465
63	27	SD3 H2	31.9442	31.6512	0.395421	32.2217		0.0122719
64	27	SD3 H2	31.3582
65	28	SD3 H3	30.0601	29.8565	1.30096	36.9375		0.0352206
66	28	SD3 H3	29.6529
67	29	SD3 H4	33.4523	33.656	0.104549	21.2108		0.00492907
68	29	SD3 H4	33.8596
69	30	C3 H1	31.4371	31.4165	0.462074	28.4579		0.0162371
70	30	C3 H1	31.3958
73	32	C3 H3	30.302	30.3464	0.939935	43.2952		0.0217099
74	32	C3 H3	30.3907
75	33	C3 H4	32.3478	31.6953	0.384005	41.1397		0.00933417
76	33	C3 H4	31.0429
83	31	C3 H2	29.6997	29.615	1.52713	48.6677		0.0313788
84	31	C3 H2	29.5302
Plate Name: Jennie OB Heart TNFa Plate 12.8.
Detector	Reporter		Start
18S Mouse	VIC		3									18s
Well	SampleName		Ct	Average CT	x for 18s							std1	5	17.9077
1	S1		18.4985	17.9077	4.97749							std2	0.5	21.3666
2	S1		17.3169									std3	0.05	26.3486
3	1	OBSD H1	14.2426	14.2429	43.8108							std4	0.005	29.3673
4	1	OBSD H1	14.2432									std5	0.0005	33.3046
5	2	OBSD H2	14.2581	14.2509	43.6033
6	2	OBSD H2	14.2437
7	3	OBSD H3	14.2034	14.2253	44.2708
8	3	OBSD H3	14.2472
9	4	OBSD H4	14.0922	14.1112	47.3725
10	4	OBSD H4	14.1302
11	5	OBSD H5	14.1272	14.2096	44.6839
12	5	OBSD H5	14.2921
13	S2		22.1581	21.3666	0.639011
14	S2		20.5751
15	6	OBSD H7	14.2213	14.2194	44.4248
16	6	OBSD H7	14.2176
17	7	OBSD H8	14.1643	14.1934	45.117
18	7	OBSD H8	14.2225
19	8	OBSD H9	14.1964	14.1608	45.9983
20	8	OBSD H9	14.1252
21	9	OBC H1	14.4355	14.4306	39.1914
22	9	OBC H1	14.4258
23	10	OBC H2	14.326	14.3667	40.7074
24	10	OBC H2	14.4074
25	S3		27.0463	26.3486	0.0332221
26	S3		25.651
27	11	OBC H3	14.2941	14.2682	43.1592
28	11	OBC H3	14.2422
29	12	OBC H4	14.7811	14.7011	33.3799
30	12	OBC H4	14.6211
31	13	OBC H5	14.1821	14.2083	44.7184
32	13	OBC H5	14.2346
33	14	OBC H6	14.4357	14.3667	40.7062
34	14	OBC H6	14.2978
35	15	OBC H7	15.8713	15.8371	17.0094
36	15	OBC H7	15.8029
37	S4		30.1562	29.3673	0.00553854
38	S4		28.5784
39	16	OBC H8	14.2884	14.2386	43.9241
40	16	OBC H8	14.1887
41	17	OBC H9	15.4619	15.3255	23.0429
42	17	OBC H9	15.1892
43	18	SD1 H1	14.4338	14.3117	42.058
44	18	SD1 H1	14.1896
45	19	SD1 H2	14.9331	14.8331	30.8638
46	19	SD1 H2	14.7332
47	20	SD1 H3	14.1935	14.1527	46.2214
48	20	SD1 H3	14.1118
49	S5		33.9683	33.3046	0.000535275
50	S5		32.641
51	21	SD1 H4	14.7032	14.5182	37.2071
52	21	SD1 H4	14.3332
53	22	C2 H1	14.7273	14.5672	36.1396
54	22	C2 H1	14.4072
55	23	C2 H2	14.0644	14.0528	49.0417
56	23	C2 H2	14.0413
57	24	C2 H3	14.2415	14.1849	45.3465
58	24	C2 H3	14.1282
59	25	C2 H4	14.1336	14.1101	47.4034
60	25	C2 H4	14.0866
61	26	SD3 H1	16.2184	15.8528	16.8517
62	26	SD3 H1	15.4872
63	27	SD3 H2	14.9728	14.7606	32.2217
64	27	SD3 H2	14.5484
65	28	SD3 H3	14.6319	14.5305	36.9375
66	28	SD3 H3	14.429
67	29	SD3 H4	14.3388	15.4652	21.2108
68	29	SD3 H4	16.5915
69	30	C3 H1	15.0702	14.9699	28.4579
70	30	C3 H1	14.8696
73	32	C3 H3	14.3161	14.2629	43.2952
74	32	C3 H3	14.2096
75	33	C3 H4	14.4835	14.3489	41.1397
76	33	C3 H4	14.2143
83	31	C3 H2	14.0038	14.0658	48.6677
84	31	C3 H2	14.1277

## Sheet: group means
control				SD				OB control				OB SD
heart				heart				heart				heart
0.0141418				0.00557453				0.0103888				0.00421671
0.0241896				0.00744123				0.00654098				0.00418231
0.0152571				0.0191528				0.00727274				0.00565473
0.0211607				0.0194756				0.00497264				0.00184061
0.0162371				0.00927109				0.013248				0.00227032
0.0313788				0.0122719				0.00866253				NA
0.0217099				0.0352206				0.00825962				0.00641059
0.00933417				0.00492907				0.0130336				0.00399003
								0.0149742				0.00406942
0.0191761				0.0141671				0.00970589				0.00407934
Standard Deviation								Standard Deviation
control				SD				OB control				OB SD
0.00687234				0.0101999				0.00341618				0.00152309
Sample Size				Sample size				Sample Size				sample size
8				8				9				8
Standard Error								Standard Error
0.00242974				0.0036062				0.00113873				0.000538493

## Sheet: Sheet2
	control	HSF	OB control	OB HSF
heart	0.0191761	0.0141671	0.00970589	0.00407934
Standard Error
	control	HSF	OB control	OB HSF
heart	0.00242974	0.0036062	0.00113873	0.000538493
