# Supplementary material for: Acute sleep fragmentation does not alter pro-inflammatory cytokine gene expression in brain or peripheral tissues of leptin-deficient mice
Source: PeerJ. 2018 Feb 19;6:e4423. doi: 10.7717/peerj.4423 (PMC5822834; doi:10.7717/peerj.4423)
Supplement: Supplemental Information 2 [file peerj-06-4423-s002.xlsx]

## Sheet: Jennie OB Heart TGFB Study 12.1
Plate Name: Jennie OB Heart TGFb Plate 12.9.14
Detector	Reporter		Start	End	Threshold
Tgfb1- Mouse	FAM		3	15	0.2							TGFB
Well	SampleName		Ct	Average CT	x for TGF	x for 18s		relative expression				std1	5	27.6796
1	S1		28.0022	27.6796	5.08566	6.69051		0.76013				std2	0.5	31.3328
2	S1		27.357									std3	0.05	35.2434
3	1	OBSD H1	25.4341	25.2465	23.3346	51.4715		0.45335				std4	0.005	38.6367
4	1	OBSD H1	25.059									std5	0.0005
5	2	OBSD H2	26.3795	25.8147	16.3492	51.193		0.319363
6	2	OBSD H2	25.2499
7	3	OBSD H3	25.5138	24.9816	27.5456	51.8751		0.530998
8	3	OBSD H3	24.4494
9	4	OBSD H4	26.0361	25.9072	15.4296	54.6821		0.282169
10	4	OBSD H4	25.7782
11	5	OBSD H5	26.1591	25.9128	15.3751	47.8709		0.321179
12	5	OBSD H5	25.6665
13	S2		31.7405	31.3328	0.516276	0.654303		0.789046
14	S2		30.9251
15	6	OBSD H7	25.2543	24.83	30.2895	59.7433		0.506995
16	6	OBSD H7	24.4056
17	7	OBSD H8	26.4564	25.672	17.8767	54.6461		0.327136
18	7	OBSD H8	24.8877
19	8	OBSD H9	25.7862	25.4171	20.9711	58.8893		0.35611
20	8	OBSD H9	25.048
21	9	OBC H1	26.2119	25.6495	18.1304	44.3659		0.408656
22	9	OBC H1	25.0872
23	10	OBC H2	26.2651	25.6822	17.7635	40.4536		0.439107
24	10	OBC H2	25.0993
25	S3		35.5071	35.2434	0.0446071	0.0244766		1.82244
26	S3		34.9798
27	11	OBC H3	25.5841	25.2923	22.6756	48.3189		0.469291
28	11	OBC H3	25.0005
29	12	OBC H4	26.353	25.8387	16.1053	35.9756		0.447672
30	12	OBC H4	25.3244
31	13	OBC H5	25.4229	25.1183	25.285	57.4587		0.440056
32	13	OBC H5	24.8138
33	14	OBC H6	25.6124	25.3058	22.4847	46.6962		0.481511
34	14	OBC H6	24.9992
35	15	OBC H7	27.0923	26.8843	8.36831	18.0781		0.462899
36	15	OBC H7	26.6762
37	S4		38.7946	38.6367	0.00532898	0.00291352		1.82905
38	S4		38.4787
39	16	OBC H8	24.663	24.6603	33.6843	52.9569		0.63607
40	16	OBC H8	24.6576
41	17	OBC H9	24.8748	24.6396	34.1227	91.2825		0.373814
42	17	OBC H9	24.4045
43	18	SD1 H1	25.2554	25.3289	22.1625	181.466		0.122131
44	18	SD1 H1	25.4023
45	19	SD1 H2	24.8552	25.4192	20.9442	123.103		0.170136
46	19	SD1 H2	25.9831
47	20	SD1 H3	24.8112	24.795	30.9597	175.438		0.176471
48	20	SD1 H3	24.7788
49	S5					0.0010046
50	S5
51	21	SD1 H4	25.1795	24.5939	35.1133	121.694		0.288538
52	21	SD1 H4	24.0084
53	22	C2 H1	25.1447	25.2048	23.9534	138.786		0.172592
54	22	C2 H1	25.2648
55	23	C2 H2	24.0635	24.0602	49.048	193.451		0.253542
56	23	C2 H2	24.0569
57	24	C2 H3	24.7673	25.142	24.9141	171.009		0.145689
58	24	C2 H3	25.5166
59	25	C2 H4	25.1646	24.9135	28.7456	162.145		0.177284
60	25	C2 H4	24.6624
61	26	SD3 H1	27.0402	26.6837	9.48774	64.2349		0.147704
62	26	SD3 H1	26.3273
63	27	SD3 H2	26.1458	25.6521	18.102	99.0515		0.182754
64	27	SD3 H2	25.1583
65	28	SD3 H3	24.4756	24.1758	45.6231	141.45		0.322539
66	28	SD3 H3	23.876
67	29	SD3 H4	26.2616	25.7793	16.7156	161.916		0.103236
68	29	SD3 H4	25.297
69	30	C3 H1	26.2655	25.5525	19.2663	88.6386		0.217358
70	30	C3 H1	24.8395
71	31	C3 H2	24.1179	23.763	59.0803	185.291		0.318852
72	31	C3 H2	23.4081
73	32	C3 H3	24.7934	24.7447	31.9493	159.862		0.199856
74	32	C3 H3	24.6961
75	33	C3 H4	26.4055	26.1652	13.1278	65.8879		0.199245
76	33	C3 H4	25.9248
Plate Name: Jennie OB Heart TGFb Plate 12.9.14
Detector	Reporter		Start		Threshold							18s
18S Mouse	VIC		3		0.2							std1	5	20.0883
Well	SampleName		Ct	Average CT	x for 18s							std2	0.5	23.7941
1	S1		20.3771	20.0883	6.69051							std3	0.05	29.0318
2	S1		19.7995									std4	0.005	32.4244
3	1	OBSD H1	16.7636	16.836	51.4715							std5	0.0005	34.1217
4	1	OBSD H1	16.9084
5	2	OBSD H2	17.0112	16.8447	51.193
6	2	OBSD H2	16.6781
7	3	OBSD H3	16.6863	16.8235	51.8751
8	3	OBSD H3	16.9608
9	4	OBSD H4	16.5664	16.7396	54.6821
10	4	OBSD H4	16.9127
11	5	OBSD H5	16.7068	16.9516	47.8709
12	5	OBSD H5	17.1964
13	S2		24.3605	23.7941	0.654303
14	S2		23.2278
15	6	OBSD H7	16.4829	16.5984	59.7433
16	6	OBSD H7	16.714
17	7	OBSD H8	16.7179	16.7406	54.6461
18	7	OBSD H8	16.7633
19	8	OBSD H9	16.6445	16.6214	58.8893
20	8	OBSD H9	16.5983
21	9	OBC H1	17.0289	17.0728	44.3659
22	9	OBC H1	17.1167
23	10	OBC H2	17.0603	17.22	40.4536
24	10	OBC H2	17.3796
25	S3		29.2256	29.0318	0.0244766
26	S3		28.838
27	11	OBC H3	16.9312	16.9367	48.3189
28	11	OBC H3	16.9423
29	12	OBC H4	17.5188	17.407	35.9756
30	12	OBC H4	17.2951
31	13	OBC H5	16.5448	16.6606	57.4587
32	13	OBC H5	16.7764
33	14	OBC H6	16.9714	16.9912	46.6962
34	14	OBC H6	17.011
35	15	OBC H7	18.6644	18.5038	18.0781
36	15	OBC H7	18.3433
37	S4		32.4959	32.4244	0.00291352
38	S4		32.3529
39	16	OBC H8	16.7389	16.7906	52.9569
40	16	OBC H8	16.8424
41	17	OBC H9	15.9581	15.9228	91.2825
42	17	OBC H9	15.8874
43	18	SD1 H1	14.9124	14.8275	181.466
44	18	SD1 H1	14.7426
45	19	SD1 H2	15.3653	15.446	123.103
46	19	SD1 H2	15.5268
47	20	SD1 H3	14.8586	14.8813	175.438
48	20	SD1 H3	14.9041
49	S5		34.7748	34.1217	0.0010046
50	S5		33.4685
51	21	SD1 H4	15.5561	15.4644	121.694
52	21	SD1 H4	15.3727
53	22	C2 H1	15.25	15.2549	138.786
54	22	C2 H1	15.2598
55	23	C2 H2	14.6666	14.7256	193.451
56	23	C2 H2	14.7845
57	24	C2 H3	14.8694	14.9221	171.009
58	24	C2 H3	14.9748
59	25	C2 H4	15.0822	15.0069	162.145
60	25	C2 H4	14.9317
61	26	SD3 H1	16.725	16.4829	64.2349
62	26	SD3 H1	16.2408
63	27	SD3 H2	15.9473	15.7926	99.0515
64	27	SD3 H2	15.6378
65	28	SD3 H3	15.2078	15.2246	141.45
66	28	SD3 H3	15.2414
67	29	SD3 H4	15.1322	15.0092	161.916
68	29	SD3 H4	14.8862
69	30	C3 H1	16.354	15.9696	88.6386
70	30	C3 H1	15.5852
71	31	C3 H2	14.7317	14.7942	185.291
72	31	C3 H2	14.8568
73	32	C3 H3	15.0343	15.0296	159.862
74	32	C3 H3	15.0248
75	33	C3 H4	16.4608	16.4424	65.8879
76	33	C3 H4	16.424

## Sheet: group means
control				SD				OB control				OB SD
heart				heart				heart				heart
0.172592				0.122131				0.408656				0.45335
0.253542				0.170136				0.439107				0.319363
0.145689				0.176471				0.469291				0.530998
0.177284				0.288538				0.447672				0.282169
0.217358				0.147704				0.440056				0.321179
0.318852				0.182754				0.481511				NA
0.199856				0.322539				0.462899				0.506995
0.199245				0.103236				0.63607				0.327136
								0.373814				0.35611
0.210552				0.189189				0.462119				0.387162
Standard Deviation								Standard Deviation
control				SD				OB control				OB SD
0.0542752				0.0772975				0.0729452				0.0955965
Sample Size				Sample size				Sample Size				sample size
8				8				9				8
Standard Error								Standard Error
0.0191892				0.0273288				0.0243151				0.0337985

## Sheet: graph
	control	HSF	OB control	OB HSF
heart	0.210552	0.189189	0.462119	0.387162
Standard Error
	control	HSF	OB control	OB HSF
heart	0.0191892	0.0273288	0.0243151	0.0337985
	control	HSF	OB control	OB HSF
TGF-β1	0.210552	0.189189	0.462119	0.387162
	control	HSF	OB control	OB HSF
IL-1β	0.0105079	0.0139094	0.00336418	0.00256492
TNF-α	0.0191761	0.0141671	0.00970589	0.00407934
TGF-β1	0.210552	0.189189	0.462119	0.387162
	OB control	OB HSF
IL-1β	0.00336418	0.00256492
TNF-α	0.00970589	0.00407934
Standard Error
	control	HSF	OB control	OB HSF
IL-1β	0.0021826	0.00356631	0.000378388	0.000423544
TNF-α	0.00242974	0.0036062	0.00113873	0.000538493
TGF-β1	0.0191892	0.0273288	0.0243151	0.0337985
	il-1	tnf	tgf
control	0.0021826	0.00242974	0.0191892
HSF	0.00356631	0.0036062	0.0273288
ob con	0.000378388	0.00113873	0.0243151
ob hsf	0.000423544	0.000538493	0.0337985
