# Supplementary material for: Acute sleep fragmentation does not alter pro-inflammatory cytokine gene expression in brain or peripheral tissues of leptin-deficient mice
Source: PeerJ. 2018 Feb 19;6:e4423. doi: 10.7717/peerj.4423 (PMC5822834; doi:10.7717/peerj.4423)
Supplement: Supplemental Information 3 [file peerj-06-4423-s003.xlsx]

## Sheet: Jennie OB Heart IL-1B Study 12.
Plate Name: Jennie OB Heart IL1B Plate 12.6.14
Detector	Reporter		Start	End	Threshold							IL1B
IL1 Mouse	FAM		3	15	0.2							std1	5	28.0506
Well	SampleName		Ct	Average CT	x for IL1	x for 18s		relative expression				std2	0.5	31.6584
1	S1		28.6364	28.0506	4.66622	6.05114		0.771131				std3	0.05	35.9666
2	S1		27.4648									std4	0.005	39.8189
3	1	OBSD H1	35.1456	34.8411	0.0900296	49.8848		0.00180475				std5	0.0005
4	1	OBSD H1	34.5366
5	2	OBSD H2	34.931	34.5228	0.108335	51.8173		0.00209071
6	2	OBSD H2	34.1145
7	3	OBSD H3	33.3833	32.8773	0.281993	55.8342		0.00505055
8	3	OBSD H3	32.3713
9	4	OBSD H4	34.8733	34.3833	0.117487	55.1448		0.00213052
10	4	OBSD H4	33.8932
11	5	OBSD H5	33.6959	33.5588	0.189741	52.1354		0.0036394
12	5	OBSD H5	33.4217
13	S2		32.5175	31.6584	0.572805	0.558121		1.02631
14	S2		30.7993
15	6	OBSD H7	34.7408	34.0186	0.145233	57.4752		0.00252688
16	6	OBSD H7	33.2964
17	7	OBSD H8	35.2554	34.895	0.0872521	52.0841		0.00167522
18	7	OBSD H8	34.5346
19	8	OBSD H9	34.9504	34.9124	0.0863714	53.9373		0.00160133
20	8	OBSD H9	34.8745
21	9	OBC H1	34.2478	33.6435	0.180619	41.9458		0.00430601
22	9	OBC H1	33.0393
23	10	OBC H2	35.4204	34.802	0.0921024	44.7204		0.00205951
24	10	OBC H2	34.1835
25	S3		36.3008	35.9666	0.0467951	0.0286576		1.6329
26	S3		35.6324
27	11	OBC H3	34.0287	33.926	0.15327	51.2642		0.00298981
28	11	OBC H3	33.8232
29	12	OBC H4	35.1691	35.1915	0.0734384	31.4037		0.00233853
30	12	OBC H4	35.2138
31	13	OBC H5	33.9589	33.6711	0.177749	54.9586		0.00323423
32	13	OBC H5	33.3833
33	14	OBC H6	34.7545	34.5814	0.104703	47.5279		0.00220298
34	14	OBC H6	34.4083
35	15	OBC H7	34.81	34.664	0.0997936	21.2084		0.00470538
36	15	OBC H7	34.518
37	S4		39.7716	39.8189	0.00498318	0.00509472		0.978108
38	S4		39.8662
39	16	OBC H8	33.9572	33.79	0.165881	51.0911		0.00324678
40	16	OBC H8	33.6227
41	17	OBC H9	34.0581	33.9186	0.153931	29.6342		0.00519437
42	17	OBC H9	33.779
43	18	SD1 H1	32.4309	32.386	0.375213	49.6568		0.00755612
44	18	SD1 H1	32.3412
45	19	SD1 H2	33.3215	33.0373	0.256944	38.4002		0.00669123
46	19	SD1 H2	32.7531
47	20	SD1 H3	31.3544	31.3227	0.696238	44.2798		0.0157236
48	20	SD1 H3	31.2911
49	S5					0.000634308
50	S5
51	21	SD1 H4	32.0529	31.8895	0.500789	33.4234		0.0149832
52	21	SD1 H4	31.7261
53	22	C2 H1	35.2326	34.9018	0.0869053	35.9424		0.0024179
54	22	C2 H1	34.5711
55	23	C2 H2	33.1148	33.1044	0.247114	50.1818		0.00492437
56	23	C2 H2	33.094
57	24	C2 H3	32.4748	32.5724	0.336696	43.156		0.00780183
58	24	C2 H3	32.6699
59	25	C2 H4	31.535	31.3008	0.70518	45.6401		0.0154509
60	25	C2 H4	31.0666
61	26	SD3 H1	34.4358	34.0459	0.142946	17.5028		0.00816701
62	26	SD3 H1	33.656
63	27	SD3 H2	32.9745	32.6454	0.322686	29.9309		0.010781
64	27	SD3 H2	32.3164
65	28	SD3 H3	30.4709	30.1681	1.36243	36.3358		0.0374956
66	28	SD3 H3	29.8652
67	29	SD3 H4	32.6435	33.0363	0.257094	26.0286		0.00987738
68	29	SD3 H4	33.4291
69	30	C3 H1	34.1047	34.0363	0.143742	27.5149		0.00522413
70	30	C3 H1	33.968
71	31	C3 H2	31.151	30.9473	0.866079	52.5571		0.0164788
72	31	C3 H2	30.7436
73	32	C3 H3	31.2026	31.1117	0.787154	41.8659		0.0188018
74	32	C3 H3	31.0207
75	33	C3 H4	32.149	31.7492	0.543351	41.9135		0.0129636
76	33	C3 H4	31.3494
Plate Name: Jennie OB Heart IL1B Plate 12.6.14
Detector	Reporter		Start		Threshold							18s
18S Mouse	VIC		3		0.2							std1	5	16.6648
Well	SampleName		Ct	Average CT	x for 18s							std2	0.5	20.5403
1	S1		17.1492	16.6648	6.05114							std3	0.05	25.3681
2	S1		16.1804									std4	0.005	28.1765
3	1	OBSD H1	13.347	13.2348	49.8848							std5	0.0005	31.5642
4	1	OBSD H1	13.1226
5	2	OBSD H2	13.2526	13.173	51.8173
6	2	OBSD H2	13.0934
7	3	OBSD H3	13.1286	13.0516	55.8342
8	3	OBSD H3	12.9746
9	4	OBSD H4	13.1488	13.0718	55.1448
10	4	OBSD H4	12.9948
11	5	OBSD H5	13.187	13.163	52.1354
12	5	OBSD H5	13.1391
13	S2		21.4102	20.5403	0.558121
14	S2		19.6703
15	6	OBSD H7	13.0573	13.0045	57.4752
16	6	OBSD H7	12.9517
17	7	OBSD H8	13.2501	13.1646	52.0841
18	7	OBSD H8	13.0792
19	8	OBSD H9	13.1189	13.1078	53.9373
20	8	OBSD H9	13.0967
21	9	OBC H1	13.7382	13.5167	41.9458
22	9	OBC H1	13.2951
23	10	OBC H2	13.5518	13.4125	44.7204
24	10	OBC H2	13.2732
25	S3		26.0545	25.3681	0.0286576
26	S3		24.6817
27	11	OBC H3	13.2413	13.1905	51.2642
28	11	OBC H3	13.1396
29	12	OBC H4	14.0508	13.9873	31.4037
30	12	OBC H4	13.9238
31	13	OBC H5	13.1272	13.0773	54.9586
32	13	OBC H5	13.0274
33	14	OBC H6	13.3546	13.3135	47.5279
34	14	OBC H6	13.2724
35	15	OBC H7	14.7386	14.6256	21.2084
36	15	OBC H7	14.5125
37	S4		28.3729	28.1765	0.00509472
38	S4		27.9802
39	16	OBC H8	13.2571	13.1959	51.0911
40	16	OBC H8	13.1348
41	17	OBC H9	14.0904	14.0816	29.6342
42	17	OBC H9	14.0728
43	18	SD1 H1	13.2712	13.2423	49.6568
44	18	SD1 H1	13.2133
45	19	SD1 H2	13.7628	13.6603	38.4002
46	19	SD1 H2	13.5577
47	20	SD1 H3	13.4602	13.4286	44.2798
48	20	SD1 H3	13.397
49	S5		31.9264	31.5642	0.000634308
50	S5		31.202
51	21	SD1 H4	14.0148	13.8859	33.4234
52	21	SD1 H4	13.7571
53	22	C2 H1	13.8412	13.7678	35.9424
54	22	C2 H1	13.6944
55	23	C2 H2	13.2631	13.2251	50.1818
56	23	C2 H2	13.1872
57	24	C2 H3	13.487	13.4704	43.156
58	24	C2 H3	13.4538
59	25	C2 H4	13.4798	13.3794	45.6401
60	25	C2 H4	13.279
61	26	SD3 H1	15.0331	14.9378	17.5028
62	26	SD3 H1	14.8425
63	27	SD3 H2	14.2152	14.0654	29.9309
64	27	SD3 H2	13.9156
65	28	SD3 H3	13.9194	13.7501	36.3358
66	28	SD3 H3	13.5808
67	29	SD3 H4	13.7643	14.2926	26.0286
68	29	SD3 H4	14.8208
69	30	C3 H1	14.3112	14.2022	27.5149
70	30	C3 H1	14.0933
71	31	C3 H2	13.1567	13.15	52.5571
72	31	C3 H2	13.1432
73	32	C3 H3	13.5843	13.5198	41.8659
74	32	C3 H3	13.4552
75	33	C3 H4	13.6754	13.5179	41.9135
76	33	C3 H4	13.3604

## Sheet: group means
control				SD				OB control				OB SD
heart				heart				heart				heart
0.0024179				0.00755612				0.00430601				0.00180475
0.00492437				0.00669123				0.00205951				0.00209071
0.00780183				0.0157236				0.00298981				0.00505055
0.0154509				0.0149832				0.00233853				0.00213052
0.00522413				0.00816701				0.00323423				0.0036394
0.0164788				0.010781				0.00220298				NA
0.0188018				0.0374956				0.00470538				0.00252688
0.0129636				0.00987738				0.00324678				0.00167522
								0.00519437				0.00160133
0.0105079				0.0139094				0.00336418				0.00256492
Standard Deviation								Standard Deviation
control				SD				OB control				OB SD
0.00617332				0.010087				0.00113516				0.00119796
Sample Size				Sample size				Sample Size				sample size
8				8				9				8
Standard Error								Standard Error
0.0021826				0.00356631				0.000378388				0.000423544

## Sheet: graph
	control	HSF	OB control	OB HSF
heart	0.0105079	0.0139094	0.00336418	0.00256492
Standard Error
	control	HSF	OB control	OB HSF
heart	0.0021826	0.00356631	0.000378388	0.000423544
