# Supplementary material for: Acute sleep fragmentation does not alter pro-inflammatory cytokine gene expression in brain or peripheral tissues of leptin-deficient mice
Source: PeerJ. 2018 Feb 19;6:e4423. doi: 10.7717/peerj.4423 (PMC5822834; doi:10.7717/peerj.4423)
Supplement: Supplemental Information 4 [file peerj-06-4423-s004.xls]

## Sheet: Jennie OB Periphery IL1B 12.5.1
Plate Name: Jennie OB Periphery1 IL-1B 11.9.14
Detector	Reporter			Start	End	Threshold							IL1B
IL1 Mouse	FAM			3	15	0.2							std1	5	25.4002
Well	SampleName			Ct	average CT	x for IL1	X for 18s		relative expression				std2	0.5	28.706
1	S1			26.3913	25.4002	4.32293	5.05532		0.855125				std3	0.05	32.4629
2	S1			24.409									std4	0.005	36.7331
3	1		OBSD1 L1	33.295	32.9943	0.042146	30.3731		0.00138761				std5	0.0005
4	1		OBSD1 L1	32.6935
5	2		OBSD1 S1	27.7155	27.5359	1.17544	31.2815		0.0375764
6	2		OBSD1 S1	27.3563
7	3		OBSD1 F1	31.6051	31.4739	0.106504	32.804		0.00324668
8	3		OBSD1 F1	31.3427
9	4		OBSD1 L2	32.1329	31.6833	0.0937404	37.1561		0.00252288
10	4		OBSD1 L2	31.2336
11	5		OBSD1 S2	28.4208	28.272	0.750365	25.4139		0.0295258
12	5		OBSD1 S2	28.1232
13	S2			29.4203	28.706	0.575895	0.502316		1.14648
14	S2			27.9917
15	6		OBSD1 F2	29.6664	29.1534	0.438395	13.5817		0.0322783
16	6		OBSD1 F2	28.6404
17	7		OBC1 L1	31.4592	31.2397	0.122853	18.313		0.00670852
18	7		OBC1 L1	31.0202
19	8		OBC1 S1	29.6656	29.5923	0.335459	3.90854		0.0858271
20	8		OBC1 S1	29.519
21	9		OBC1 F1	30.0739	29.5545	0.343281	29.4875		0.0116415
22	9		OBC1 F1	29.0351
23	10		OBC1 L2	31.7202	31.4175	0.110227	29.7675		0.00370293
24	10		OBC1 L2	31.1149
25	S3			33.3085	32.4629	0.0582745	0.0478635		1.21751
26	S3			31.6172
27	11		OBC1 S2	33.0357	32.791	0.0477053	1.44938		0.0329143
28	11		OBC1 S2	32.5464
29	12		OBC1 F2	30.3719	30.3065	0.217025	34.3145		0.00632458
30	12		OBC1 F2	30.2411
31	25		OBSD2 L5	34.0392	33.8247	0.0254012	6.16266		0.0041218
32	25		OBSD2 L5	33.6101
33	26		OBSD2 S5	28.938	28.6028	0.613318	11.5607		0.0530518
34	26		OBSD2 S5	28.2675
35	27		OBSD2 F5	28.5999	28.8923	0.514054	30.8491		0.0166635
36	27		OBSD2 F5	29.1847
37	S4			38.0139	36.7331	0.00431166	0.00513188		0.840171
38	S4			35.4524
39	28		OBC2 L5	30.9181	31.1189	0.13224	32.0821		0.00412192
40	28		OBC2 L5	31.3198
41	29		OBC2 S5	27.7734	27.4654	1.22711	30.3209		0.0404709
42	29		OBC2 S5	27.1573
43	30		OBC2 F5	31.0091	30.6743	0.17343	28.7204		0.00603856
44	30		OBC2 F5	30.3394
45	31		OBC2 L6	31.1049	31.0282	0.139759	34.5567		0.00404434
46	31		OBC2 L6	30.9516
47	32		OBC2 S6	31.1702	30.8771	0.153252	7.04909		0.0217407
48	32		OBC2 S6	30.584
49	S5						0.000667328
50	S5
51	33		OBC2 F6	31.372	30.6901	0.171762	29.79		0.00576576
52	33		OBC2 F6	30.0082
53	34		OBC2 L7	31.406	30.7174	0.168926	31.2947		0.00539792
54	34		OBC2 L7	30.0288
55	35		OBC2 S7	27.9514	27.9441	0.916442	14.8815		0.0615825
56	35		OBC2 S7	27.9368
57	36		OBC2 F7	28.6159	27.9569	0.90929	39.6241		0.0229479
58	36		OBC2 F7	27.298
59	49		C2 L1	32.3004	32.5834	0.0541429	33.8524		0.00159938
60	49		C2 L1	32.8665
61	50		C2 S1	29.9931	29.2157	0.422054	6.52003		0.0647319
62	50		C2 S1	28.4383
63	51		C2 F1	29.9326	29.5723	0.339575	22.9927		0.0147688
64	51		C2 F1	29.212
65	52		C2 L2	33.6898	33.0857	0.0398614	21.9262		0.00181798
66	52		C2 L2	32.4815
67	53		C2 S2	31.6503	30.9188	0.1494	5.63476		0.026514
68	53		C2 S2	30.1874
69	54		C2 F2	32.1521	32.0583	0.0745754	36.6281		0.00203602
70	54		C2 F2	31.9646
71	55		C2 L3	33.0931	32.8753	0.0453178	28.3226		0.00160006
72	55		C2 L3	32.6574
73	56		C2 S3	30.4444	30.482	0.195006	1.03496		0.188419
74	56		C2 S3	30.5195
75	57		C2 F3	27.7068	27.5621	1.15682	11.0946		0.104268
76	57		C2 F3	27.4174
77	58		C2 L4	31.9567	31.7658	0.0891388	21.8891		0.00407228
78	58		C2 L4	31.5749
79	59		C2 S4				0.021308
80	59		C2 S4
81	60		C2 F4	29.7301	29.7664	0.301672	18.5237		0.0162857
82	60		C2 F4	29.8027
83	73		C3 L1	32.2818	32.237	0.0668805	4.22225		0.01584
84	73		C3 L1	32.1921
85	74		C3 S1	31.8853	31.6349	0.0965482	0.0645251		1.49629
86	74		C3 S1	31.3844
87	75		C3 F1	28.279	28.6983	0.578606	26.7484		0.0216314
88	75		C3 F1	29.1176
89	76		C3 L2	31.3032	31.2649	0.120983	15.3785		0.00786703
90	76		C3 L2	31.2265
91	77		C3 S2	29.8709	30.0617	0.251955	1.94227		0.129722
92	77		C3 S2	30.2526
93	78		C3 F2	30.1622	30.0319	0.256583	32.8615		0.00780801
94	78		C3 F2	29.9016
95	79		C3 L3	30.4735	30.2696	0.22197	26.7613		0.00829444
96	79		C3 L3	30.0656
Plate Name: Jennie OB Periphery1 IL-1B 11.9.14													18s
Detector	Reporter			Start	3	Threshold							std1	5	18.2435
18S Mouse	VIC			3		0.2							std2	0.5	22.0672
Well	SampleName			Ct	average CT	X for 18s							std3	0.05	25.9603
1	S1			19.1399	18.2435	5.05532							std4	0.005	29.6579
2	S1			17.3472									std5	0.0005
3	1		OBSD1 L1	15.3858	15.2741	30.3731
4	1		OBSD1 L1	15.1625
5	2		OBSD1 S1	15.3008	15.2254	31.2815
6	2		OBSD1 S1	15.1499
7	3		OBSD1 F1	15.0828	15.1467	32.804
8	3		OBSD1 F1	15.2105
9	4		OBSD1 L2	14.998	14.9403	37.1561
10	4		OBSD1 L2	14.8827
11	5		OBSD1 S2	15.7989	15.5694	25.4139
12	5		OBSD1 S2	15.3398
13	S2			22.7684	22.0672	0.502316
14	S2			21.366
15	6		OBSD1 F2	17.2271	16.607	13.5817
16	6		OBSD1 F2	15.9868
17	7		OBC1 L1	16.1322	16.112	18.313
18	7		OBC1 L1	16.0918
19	8		OBC1 S1	18.734	18.6696	3.90854
20	8		OBC1 S1	18.6052
21	9		OBC1 F1	15.3848	15.3232	29.4875
22	9		OBC1 F1	15.2615
23	10		OBC1 L2	15.4238	15.3075	29.7675
24	10		OBC1 L2	15.1912
25	S3			26.8769	25.9603	0.0478635
26	S3			25.0436
27	11		OBC1 S2	21.0271	20.3124	1.44938
28	11		OBC1 S2	19.5977
29	12		OBC1 F2	15.2549	15.0721	34.3145
30	12		OBC1 F2	14.8893
31	25		OBSD2 L5	18.4653	17.9155	6.16266
32	25		OBSD2 L5	17.3658
33	26		OBSD2 S5	17.192	16.8738	11.5607
34	26		OBSD2 S5	16.5555
35	27		OBSD2 F5	15.1984	15.2484	30.8491
36	27		OBSD2 F5	15.2984
37	S4			30.5934	29.6579	0.00513188
38	S4			28.7224
39	28		OBC2 L5	15.3381	15.1835	32.0821
40	28		OBC2 L5	15.0289
41	29		OBC2 S5	15.4672	15.277	30.3209
42	29		OBC2 S5	15.0868
43	30		OBC2 F5	15.6247	15.3668	28.7204
44	30		OBC2 F5	15.1089
45	31		OBC2 L6	15.1026	15.0604	34.5567
46	31		OBC2 L6	15.0183
47	32		OBC2 S6	18.2227	17.693	7.04909
48	32		OBC2 S6	17.1633
49	S5			32.5614	33.0361	0.000667328
50	S5			33.5107
51	33		OBC2 F6	15.7192	15.3063	29.79
52	33		OBC2 F6	14.8933
53	34		OBC2 L7	15.3882	15.2247	31.2947
54	34		OBC2 L7	15.0611
55	35		OBC2 S7	16.7703	16.4556	14.8815
56	35		OBC2 S7	16.1409
57	36		OBC2 F7	14.8199	14.8338	39.6241
58	36		OBC2 F7	14.8478
59	49		C2 L1	15.1256	15.0945	33.8524
60	49		C2 L1	15.0635
61	50		C2 S1	18.3191	17.8222	6.52003
62	50		C2 S1	17.3253
63	51		C2 F1	15.9482	15.7352	22.9927
64	51		C2 F1	15.5221
65	52		C2 L2	16.2326	15.8138	21.9262
66	52		C2 L2	15.395
67	53		C2 S2	18.7755	18.0639	5.63476
68	53		C2 S2	17.3522
69	54		C2 F2	15.0511	14.9641	36.6281
70	54		C2 F2	14.877
71	55		C2 L3	15.4872	15.3899	28.3226
72	55		C2 L3	15.2926
73	56		C2 S3	21.284	20.8701	1.03496
74	56		C2 S3	20.4562
75	57		C2 F3	17.0548	16.9419	11.0946
76	57		C2 F3	16.829
77	58		C2 L4	16.0311	15.8166	21.8891
78	58		C2 L4	15.6021
79	59		C2 S4	28.3938	27.3004	0.021308
80	59		C2 S4	26.207
81	60		C2 F4	16.1912	16.093	18.5237
82	60		C2 F4	15.9949
83	73		C3 L1	19.0442	18.5418	4.22225
84	73		C3 L1	18.0393
85	74		C3 S1	25.9958	25.4656	0.0645251
86	74		C3 S1	24.9354
87	75		C3 F1	15.4979	15.4846	26.7484
88	75		C3 F1	15.4713
89	76		C3 L2	16.3948	16.4012	15.3785
90	76		C3 L2	16.4076
91	77		C3 S2	19.8641	19.8276	1.94227
92	77		C3 S2	19.7912
93	78		C3 F2	15.2868	15.1438	32.8615
94	78		C3 F2	15.0007
95	79		C3 L3	15.6476	15.4838	26.7613
96	79		C3 L3	15.32									1L1B
Plate Name: Jennie OB Periphery IL-1B Plate 2 11.10													std1	5	25.3687
Detector	Reporter			Start		Threshold							std2	0.5	28.8304
IL1 Mouse	FAM			3	3	0.2							std3	0.05	32.5649
Well	SampleName			Ct	average CT	x for 1L1	X for 18s		relative expression				std4	0.005	37.315
1	S1			25.4424	25.3687	4.23518	4.61324		0.918049				std5	0.0005
2	S1			25.2951
3	13		OBC1 L3	35.6413	35.7856	0.00988857	2.74212		0.00360618
4	13		OBC1 L3	35.9298
5	14		OBC1 S3	32.5994	32.2303	0.0782249	0.969257		0.080706
6	14		OBC1 S3	31.8612
7	15		OBC1 F3	36.0068	35.3721	0.0125777	0.109071		0.115316
8	15		OBC1 F3	34.7373
9	16		OBC1 L4	34.1716	33.805	0.0312964	1.97757		0.0158257
10	16		OBC1 L4	33.4385
11	17		OBC1 S4	30.4823	30.5648	0.206127	3.6162		0.0570012
12	17		OBC1 S4	30.6472
13	S2			29.3427	28.8304	0.565354	0.502835		1.12433
14	S2			28.318
15	18		OBC1 F4	32.8139	32.3734	0.0719745	20.13		0.00357549
16	18		OBC1 F4	31.933
17	19		OBSD2 L3	32.7707	32.5606	0.0645482	12.6069		0.00512005
18	19		OBSD2 L3	32.3506
19	20		OBSD2 S3	28.2504	28.2257	0.803701	23.387		0.0343652
20	20		OBSD2 S3	28.2009
21	21		OBSD2 F3	31.5744	31.8954	0.0950535	39.5376		0.00240413
22	21		OBSD2 F3	32.2163
23	22		OBSD2 L4	32.5508	32.3463	0.0731203	26.3948		0.00277025
24	22		OBSD2 L4	32.1418
25	S3			33.3113	32.5649	0.0643888	0.0544047		1.18351
26	S3			31.8185
27	23		OBSD2 S4	28.7981	28.5111	0.680734	17.1069		0.039793
28	23		OBSD2 S4	28.2241
29	24		OBSD2 F4	32.1455	31.963	0.0913853	38.451		0.00237667
30	24		OBSD2 F4	31.7805
31	37		SD1 L1	32.7383	32.2757	0.0761859	32.4151		0.00235033
32	37		SD1 L1	31.8131
33	38		SD1 S1	29.5399	29.2808	0.435028	7.07268		0.0615083
34	38		SD1 S1	29.0217
35	39		SD1 F1	28.1203	27.9756	0.92954	17.1193		0.0542977
36	39		SD1 F1	27.8309
37	S4			37.8415	37.315	0.00406188	0.00574659		0.706834
38	S4			36.7885
39	40		SD1 L2	33.4099	33.4143	0.0392828	14.2965		0.00274771
40	40		SD1 L2	33.4188
41	41		SD1 S2				0.0167287		0
42	41		SD1 S2
43	42		SD1 F2	29.734	29.6215	0.356803	5.03463		0.0708698
44	42		SD1 F2	29.5091
45	43		SD1 L3	34.3577	34.0315	0.0274336	28.1154		0.00097575
46	43		SD1 L3	33.7053
47	44		SD1 S3	29.4009	29.2471	0.443628	10.5929		0.0418797
48	44		SD1 S3	29.0934
49	S5						0.000432457		0
50	S5
51	45		SD1 F3	26.6895	26.514	2.17543	24.007		0.0906165
52	45		SD1 F3	26.3384
53	46		SD1 L4	33.6629	33.5833	0.0356045	24.5703		0.00144909
54	46		SD1 L4	33.5038
55	47		SD1 S4				0.0335784		0
56	47		SD1 S4
57	48		SD1 F4	28.1834	27.8255	1.01433	27.8726		0.0363915
58	48		SD1 F4	27.4677
59	61		SD3 L1				0.0719519		0
60	61		SD3 L1
61	62		SD3 S1	33.0318	32.6448	0.0614627	0.371188		0.165584
62	62		SD3 S1	32.2579
63	63		SD3 F1	31.2431	30.6305	0.198386	1.00626		0.197152
64	63		SD3 F1	30.018
65	64		SD3 L2	34.0017	33.358	0.0405918	12.7813		0.00317587
66	64		SD3 L2	32.7143
67	65		SD3 S2	30.6135	30.4562	0.219557	3.04572		0.072087
68	65		SD3 S2	30.299
69	66		SD3 F2	33.0603	32.9043	0.0528522	6.83858		0.00772854
70	66		SD3 F2	32.7483
71	67		SD3 L3	32.0429	31.9576	0.0916729	24.8295		0.0036921
72	67		SD3 L3	31.8723
73	68		SD3 S3	32.977	32.8536	0.0544342	0.341704		0.159302
74	68		SD3 S3	32.7302
75	69		SD3 F3	32.8404	32.9036	0.0528753	0.37646		0.140454
76	69		SD3 F3	32.9667
77	70		SD3 L4				0.0121938
78	70		SD3 L4
79	71		SD3 S4	29.0166	29.1472	0.470173	5.0092		0.093862
80	71		SD3 S4	29.2779
81	72		SD3 F4	28.5607	28.45	0.705385	0.0792881		8.89648
82	72		SD3 F4	28.3392
83	80		C3 S3	33.2057	33.5003	0.0373669	1.34075		0.0278702
84	80		C3 S3	33.7949
85	81		C3 F3	31.381	31.5587	0.115613	25.9743		0.00445107
86	81		C3 F3	31.7365
87	82		C3 L4	35.9874	35.8122	0.00973616	10.5852		0.00091979
88	82		C3 L4	35.6371
89	83		C3 S4	28.2735	28.1345	0.847492	22.2408		0.0381052
90	83		C3 S4	27.9954
91	84		C3 F4	31.454	31.5027	0.119449	19.3599		0.00616988
92	84		C3 F4	31.5513
Plate Name: Jennie OB Periphery IL-1B Plate 2 11.10
Detector	Reporter			Start		Threshold
18S Mouse	VIC			3	3	0.2
Well	SampleName			Ct	average CT	X for 18s							18s
1	S1			17.6311	17.4468	4.61324							std1	5	17.4468		17.8712
2	S1			17.2625									std2	0.5	21.4076		21.7886
3	13		OBC1 L3	18.5681	18.3764	2.74212							std3	0.05	25.3815		26.221
4	13		OBC1 L3	18.1847									std4	0.005	29.3984		29.2597
5	14		OBC1 S3	20.5129	20.2348	0.969257							std5	0.0005	34.0211		32.7274
6	14		OBC1 S3	19.9567
7	15		OBC1 F3	24.7888	24.1385	0.109071
8	15		OBC1 F3	23.4883
9	16		OBC1 L4	19.2345	18.9605	1.97757
10	16		OBC1 L4	18.6865
11	17		OBC1 S4	18.1821	17.8819	3.6162
12	17		OBC1 S4	17.5818
13	S2			21.9109	21.4076	0.502835
14	S2			20.9042
15	18		OBC1 F4	15.0738	14.814	20.13
16	18		OBC1 F4	14.5543
17	19		OBSD2 L3	15.7159	15.6503	12.6069
18	19		OBSD2 L3	15.5847
19	20		OBSD2 S3	14.6096	14.5461	23.387
20	20		OBSD2 S3	14.4825
21	21		OBSD2 F3	13.5964	13.6077	39.5376
22	21		OBSD2 F3	13.6191
23	22		OBSD2 L4	14.2992	14.3299	26.3948
24	22		OBSD2 L4	14.3605
25	S3			25.9911	25.3815	0.0544047
26	S3			24.7719
27	23		OBSD2 S4	15.1878	15.1048	17.1069
28	23		OBSD2 S4	15.0219
29	24		OBSD2 F4	13.7162	13.6576	38.451
30	24		OBSD2 F4	13.5989
31	37		SD1 L1	14.1989	13.9627	32.4151
32	37		SD1 L1	13.7265
33	38		SD1 S1	16.9046	16.6832	7.07268
34	38		SD1 S1	16.4618
35	39		SD1 F1	15.3864	15.1036	17.1193
36	39		SD1 F1	14.8207
37	S4			29.7763	29.3984	0.00574659
38	S4			29.0205
39	40		SD1 L2	15.6637	15.4256	14.2965
40	40		SD1 L2	15.1874
41	41		SD1 S2	27.5683	27.489	0.0167287
42	41		SD1 S2	27.4096
43	42		SD1 F2	17.5701	17.2906	5.03463
44	42		SD1 F2	17.0111
45	43		SD1 L3	14.3735	14.217	28.1154
46	43		SD1 L3	14.0605
47	44		SD1 S3	16.2838	15.9613	10.5929
48	44		SD1 S3	15.6389
49	S5			34.2153	34.0211	0.000432457
50	S5			33.827
51	45		SD1 F3	14.6944	14.4993	24.007
52	45		SD1 F3	14.3042
53	46		SD1 L4	14.5685	14.4579	24.5703
54	46		SD1 L4	14.3472
55	47		SD1 S4	26.6379	26.2438	0.0335784
56	47		SD1 S4	25.8498
57	48		SD1 F4	14.4306	14.2325	27.8726
58	48		SD1 F4	14.0344
59	61		SD3 L1	24.8666	24.8819	0.0719519
60	61		SD3 L1	24.8973
61	62		SD3 S1	22.317	21.95	0.371188
62	62		SD3 S1	21.583
63	63		SD3 F1	21.0074	20.1679	1.00626
64	63		SD3 F1	19.3283
65	64		SD3 L2	16.1358	15.6258	12.7813
66	64		SD3 L2	15.1157
67	65		SD3 S2	18.3683	18.1887	3.04572
68	65		SD3 S2	18.0092
69	66		SD3 F2	17.0408	16.7433	6.83858
70	66		SD3 F2	16.4459
71	67		SD3 L3	14.4958	14.4391	24.8295
72	67		SD3 L3	14.3824
73	68		SD3 S3	22.1956	22.0979	0.341704
74	68		SD3 S3	22.0002
75	69		SD3 F3	21.875	21.9248	0.37646
76	69		SD3 F3	21.9746
77	70		SD3 L4	28.22	28.054	0.0121938
78	70		SD3 L4	27.888
79	71		SD3 S4	17.3453	17.2996	5.0092
80	71		SD3 S4	17.254
81	72		SD3 F4	24.8837	24.7084	0.0792881
82	72		SD3 F4	24.5332
83	80		C3 S3	19.5944	19.655	1.34075
84	80		C3 S3	19.7156
85	81		C3 F3	14.4697	14.3586	25.9743
86	81		C3 F3	14.2474
87	82		C3 L4	15.9892	15.9627	10.5852
88	82		C3 L4	15.9361
89	83		C3 S4	14.6575	14.6359	22.2408
90	83		C3 S4	14.6142
91	84		C3 F4	14.8648	14.8837	19.3599
92	84		C3 F4	14.9027
Plate Name: Jennie IL-1B Brain and Periphery Plate 3 12.3.14													IL1B
Detector	Reporter			Start		Threshold							std1	5	27.9807
IL1 Mouse	FAM			3		0.2							std2	0.5	32.3027
Well	SampleName			Ct	average CT	x for IL1	x for 18s		relative expression				std3	0.05	36.1745
1	S1			28.1984	27.9807	5.4635	5.8938		0.926992				std4	0.005	39.9493
2	S1			27.763									std5	0.0005
3	85		OBSD3 L7	35.2596	35.3145	0.0783918	0.0277113		2.82887
4	85		OBSD3 L7	35.3695
5	86		OBSD3 S7	31.7694	31.7726	0.608781	0.165601		3.67619
6	86		OBSD3 S7	31.7758
7	87		OBSD3 F7	33.8104	33.6354	0.207157	0.0408254		5.07423
8	87		OBSD3 F7	33.4603
9	88		OBSD3 L8	33.4509	33.4901	0.225317	0.0264653		8.51365
10	88		OBSD3 L8	33.5294
11	89		OBSD3 S8	30.8979	31.1207	0.887773	0.118349		7.50131
12	89		OBSD3 S8	31.3435
13	S2			32.8556	32.3027	0.447953	0.521141		0.859561
14	S2			31.7498
15	90		OBSD3 L9	38.7105	38.7105	0.0109843	0.139686		0.078636
16	90		OBSD3 L9
17	91		OBSD3 S9	36.7255	36.9286	0.0308054	0.404924		0.0760771
18	91		OBSD3 S9	37.1316
19	92		OBSD3 F9	35.1065	35.1752	0.0849779	0.0292342		2.90679
20	92		OBSD3 F9	35.2438
21	93		OBC3 L8	35.525	35.3489	0.0768489	0.0338163		2.27254
22	93		OBC3 L8	35.1728
23	94		OBC3 S8	33.7352	33.5707	0.215055	0.225073		0.955489
24	94		OBC3 S8	33.4062
25	S3			36.3882	36.1745	0.0476586	0.0334985		1.42271
26	S3			35.9608
27	95		OBC3 F8	32.9356	32.888	0.319249	0.0329932		9.67623
28	95		OBC3 F8	32.8404
29	96		OBC3 L9				0.0194995		0
30	96		OBC3 L9
31	97		OBC3 S9	34.1039	34.2622	0.144135	0.257361		0.560048
32	97		OBC3 S9	34.4204
33	98		OBC3 F9	33.8969	33.9269	0.175	0.0296609		5.90003
34	98		OBC3 F9	33.9568
35	99		OBSD3 F8	34.3779	34.4169	0.131788	31.9067		0.0041304
36	99		OBSD3 F8	34.4559
37	S4				39.9493	0.00536326	0.00510348		1.0509
38	S4			39.9493
49	S5						0.000596152		0
50	S5
Plate Name: Jennie IL-1B Brain and Periphery Plate 3 12.3.14													18s
Detector	Reporter			Start		Threshold							std1	5	17.8712
18S Mouse	VIC			3		0.2							std2	0.5	21.7886
Well	SampleName			Ct	average CT	x for 18s							std3	0.05	26.221
1	S1			18.104	17.8712	5.8938							std4	0.005	29.2597
2	S1			17.6383									std5	0.0005	32.7274
3	85		OBSD3 L7	26.5799	26.5272	0.0277113
4	85		OBSD3 L7	26.4746
5	86		OBSD3 S7	23.618	23.64	0.165601
6	86		OBSD3 S7	23.6621
7	87		OBSD3 F7	25.9404	25.9015	0.0408254
8	87		OBSD3 F7	25.8626
9	88		OBSD3 L8	26.5671	26.6015	0.0264653
10	88		OBSD3 L8	26.636
11	89		OBSD3 S8	24.0927	24.1826	0.118349
12	89		OBSD3 S8	24.2725
13	S2			22.3283	21.7886	0.521141
14	S2			21.2488
15	90		OBSD3 L9	23.9715	23.9149	0.139686
16	90		OBSD3 L9	23.8583
17	91		OBSD3 S9	22.2059	22.196	0.404924
18	91		OBSD3 S9	22.1862
19	92		OBSD3 F9	26.4721	26.4409	0.0292342
20	92		OBSD3 F9	26.4096
21	93		OBC3 L8	26.1828	26.2057	0.0338163
22	93		OBC3 L8	26.2286
23	94		OBC3 S8	23.0413	23.1445	0.225073
24	94		OBC3 S8	23.2477
25	S3			26.9298	26.221	0.0334985
26	S3			25.5121
27	95		OBC3 F8	26.3334	26.2455	0.0329932
28	95		OBC3 F8	26.1576
29	96		OBC3 L9	27.7151	27.0949	0.0194995
30	96		OBC3 L9	26.4746
31	97		OBC3 S9	22.9596	22.928	0.257361
32	97		OBC3 S9	22.8964
33	98		OBC3 F9	26.3778	26.4175	0.0296609
34	98		OBC3 F9	26.4571
35	99		OBSD3 F8	15.125	15.1436	31.9067
36	99		OBSD3 F8	15.1621
37	S4			29.5782	29.2597	0.00510348
38	S4			28.9412
49	S5			32.9884	32.7274	0.000596152
50	S5			32.4664
Plate Name: Jennie OB Periphery Plate3 Redo 12.9.14
Detector	Reporter		Start	End	Threshold
IL1 Mouse	FAM		3	15	0.2
Well	SampleName		Ct	average CT	x for IL1	x for 18s			relative expression			IL1
1	S1		26.6856	26.6204	6.01777	5.30441			1.13448			std1	5	26.6204
2	S1		26.5551									std2	0.5	29.99
3	88	OBSD3 L8	31.6239	31.5975	0.184837	43.672			0.0042324			std3	0.05	33.9006
4	88	OBSD3 L8	31.5712									std4	0.005	37.4963
5	96	OBC3 L9	33.7765	33.4384	0.0509716	28.7553			0.0017726			std5	0.0005	39.3156
6	96	OBC3 L9	33.1003
13	S2		30.432	29.99	0.56931	0.611506			0.930995
14	S2		29.548
15	89	OBSD3 S8	28.721	28.5785	1.52876	45.3958			0.0336763
16	89	OBSD3 S8	28.4359
17	97	OBC3 S9	30.7337	30.5389	0.387717	10.0453			0.038597
18	97	OBC3 S9	30.3442
25	S3		34.3172	33.9006	0.0368857	0.0327155			1.12747
26	S3		33.484
27	90	OBSD3 L9	37.2973	37.8268	0.00236389	0.095457			0.0247639
28	90	OBSD3 L9	38.3563
29	98	OBC3 F9	31.8966	31.7251	0.169048	47.014			0.0035957
30	98	OBC3 F9	31.5537
37	S4		38.3971	37.4963	0.00297901	0.00502895			0.592371
38	S4		36.5955
39	91	OBSD3 S9	33.5473	33.7555	0.0408264	3.07633			0.0132711
40	91	OBSD3 S9	33.9638
49	S5			39.3156	0.000833987	0.000583206			1.43
50	S5		39.3156
51	92	OBSD3 F9	33.2524	33.1553	0.0621393	47.9108			0.00129698
52	92	OBSD3 F9	33.0582
61	85	OBSD3 L7	32.7423	32.9031	0.0741308	35.9848			0.00206006
62	85	OBSD3 L7	33.064
63	93	OBC3 L8	33.2594	32.9934	0.0695938	41.6076			0.00167262
64	93	OBC3 L8	32.7274
73	86	OBSD3 S7	29.5243	29.5613	0.768514	35.0656			0.0219165
74	86	OBSD3 S7	29.5982
75	94	OBC3 S8	30.3973	30.3565	0.440503	22.9988			0.0191533
76	94	OBC3 S8	30.3158
85	87	OBSD3 F7	31.4983	31.4275	0.208195	39.2995			0.00529765
86	87	OBSD3 F7	31.3567
87	95	OBC3 F8	31.126	30.7893	0.325409	42.0987			0.00772966
88	95	OBC3 F8	30.4526
Plate Name: Jennie OB Periphery Plate3 Redo 12.9.14
Detector	Reporter		Start		Threshold							18s
18S Mouse	VIC		3	3	0.2							std1	5	18.1718
Well	SampleName		Ct	average CT	x for 18s							std2	0.5	21.8077
1	S1		18.2871	18.1718	5.30441							std3	0.05	26.7357
2	S1		18.0566									std4	0.005	29.8873
3	88	OBSD3 L8	14.6296	14.6238	43.672							std5	0.0005	33.5132
4	88	OBSD3 L8	14.618
5	96	OBC3 L9	15.3809	15.3271	28.7553
6	96	OBC3 L9	15.2733
13	S2		22.2354	21.8077	0.611506
14	S2		21.3801
15	89	OBSD3 S8	14.5985	14.5587	45.3958
16	89	OBSD3 S8	14.5188
17	97	OBC3 S9	17.126	17.0971	10.0453
18	97	OBC3 S9	17.0683
25	S3		27.1688	26.7357	0.0327155
26	S3		26.3026
27	90	OBSD3 L9	24.9974	24.9335	0.095457
28	90	OBSD3 L9	24.8696
29	98	OBC3 F9	14.4864	14.4997	47.014
30	98	OBC3 F9	14.513
37	S4		30.8099	29.8873	0.00502895
38	S4		28.9648
39	91	OBSD3 S9	19.1961	19.0888	3.07633
40	91	OBSD3 S9	18.9814
49	S5		34.3303	33.5132	0.000583206
50	S5		32.6962
51	92	OBSD3 F9	14.5654	14.4679	47.9108
52	92	OBSD3 F9	14.3704
61	85	OBSD3 L7	15.0022	14.9497	35.9848
62	85	OBSD3 L7	14.8971
63	93	OBC3 L8	14.7505	14.7053	41.6076
64	93	OBC3 L8	14.6601
73	86	OBSD3 S7	15.118	14.9932	35.0656
74	86	OBSD3 S7	14.8684
75	94	OBC3 S8	15.7476	15.7031	22.9988
76	94	OBC3 S8	15.6585
85	87	OBSD3 F7	14.97	14.8013	39.2995
86	87	OBSD3 F7	14.6327
87	95	OBC3 F8	14.7043	14.6855	42.0987
88	95	OBC3 F8	14.6668

## Sheet: group means
control				SD				OB control				OB SD
LIV	SPL	FAT		LIV	SPL	FAT		LIV	SPL	FAT		LIV	SPL	FAT
0.00159938	0.0647319	0.0147688		0.00138761	0.0375764	0.00324668		0.00670852	0.0858271	0.0116415		0.00138761	0.0375764	0.00324668
0.00181798	0.026514	0.00203602		0.00252288	0.0295258	0.0322783		0.00370293	0.0329143	0.00632458		0.00252288	0.0295258	0.0322783
0.00160006	0.188419	0.104268		0.00097575	0.0418797	0.0906165		0.00360618	0.080706	0.115316		0.00512005	0.0343652	0.00240413
0.00407228	na	0.0162857		0.00144909	NA	0.0363915		0.0158257	0.0570012	0.00357549		0.00277025	0.039793	0.00237667
0.01584		0.0216314		NA	0.165584	0.197152		0.00412192	0.0404709	0.00603856		0.0041218	0.0530518	0.0166635
0.00786703	0.129722	0.00780801		0.00317587	0.072087	0.00772854		0.00404434	0.0217407	0.00576576		NA	NA	NA
0.00829444	0.0278702	0.00445107		0.0036921	0.159302	0.140454		0.00539792	0.0615825	0.0229479		0.00529765	0.0219165	0.00529765
0.00091979	0.0381052	0.00616988		NA	0.093862			0.00167262	0.0191533	0.00772966		0.0042324	0.0336763	0.0041304
								0.0017726	0.038597	0.0035957		0.0247639	0.0132711	0.00129698
	1.49629
						8.89648
0.00525137	0.079227	0.0221774		0.00220055	0.0856881	0.0725526		0.00520586	0.0486659	0.0203262		0.00627707	0.032897	0.00846179
Standard Deviation								Standard Deviation
control				SD				OB control				OB SD
0.00516626	0.0660151	0.0338302		0.00109595	0.0569243	0.0734814		0.00428206	0.0241259	0.0361192		0.00758934	0.0119256	0.0107937
Sample Size								Sample Size
8	6	8		6	8	7		9	9	9		8	8	8
Standard Error								Standard Error
0.00182655	0.0269505	0.0119608		0.000447421	0.0201258	0.0277734		0.00142735	0.00804195	0.0120397		0.00268324	0.00421634	0.00381614

## Sheet: graph
	control	HSF	OB control	OB HSF
liver	0.00525137	0.00220055	0.00520586	0.00627707
spleen	0.079227	0.0856881	0.0486659	0.032897
fat	0.0221774	0.0725526	0.0203262	0.00846179
	OB control	OB HSF
liver	0.00520586	0.00627707
spleen	0.0486659	0.032897
fat	0.0203262	0.00846179
Standard Error
	control	HSF	OB control	OB HSF
liver	0.00182655	0.000447421	0.00142735	0.00268324
spleen	0.0269505	0.0201258	0.00804195	0.00421634
fat	0.0119608	0.0277734	0.0120397	0.00381614

## Sheet: without outliers
	control	HSF	OB control	OB HSF
liver	0.00525137	0.00220055	0.00620107	0.00318452
spleen	0.079227	0.0856881	0.166966	0.0388624
fat	0.0221774	0.0725526	0.0245157	0.0101833
Standard Error
	control	HSF	OB control	OB HSF
liver	0.00182655	0.000447421	0.0016582	0.000593824
spleen	0.0269505	0.0201258	0.106462	0.00360125
fat	0.0119608	0.0277734	0.0153338	0.00495444
