# Supplementary material for: Acute sleep fragmentation does not alter pro-inflammatory cytokine gene expression in brain or peripheral tissues of leptin-deficient mice
Source: PeerJ. 2018 Feb 19;6:e4423. doi: 10.7717/peerj.4423 (PMC5822834; doi:10.7717/peerj.4423)
Supplement: Supplemental Information 8 [file peerj-06-4423-s008.xls]

## Sheet: Sheet1
						mass lost (g)
						control	HSF	OB control	OB HSF		SD1 (1-4)	C2 (1-4)	SD3 (1-4)	C3 (1-4)
						-1.31	-3.48	-0.51	-2.68		-3.48	-1.31	-2.08	-0.94
						-0.79	-4.62	-0.97	-3.4		-4.62	-0.79	-1.93	-1.43
						-1.23	-3.27	-1.43	-2.94		-3.27	-1.23	-0.85	0.25
						-1.56	-3.85	-0.86	-1.76		-3.85	-1.56	-1.47	0.21
						-0.94	-2.08	-0.24	-3.25
						-1.43	-1.93	-0.91	-2.18
						0.25	-0.85	-0.62	-2.87
						0.21	-1.47	0.08	-1.77
								-0.68	-1.6
						control	HSF	OB control	OB HSF
						-0.85	-2.69375	-0.682222	-2.49444
						0.711317	1.30135	0.438115	0.682644
						8	8	9	9
						0.251488	0.460097	0.146038	0.227548

## Sheet: % mass lost
mass lost (g)
control	HSF	OB control	OB HSF		control	HSF	OB control	OB HSF
3.77	7.87	1.12	6.09		-2.975	-6.2575	-1.57778	-5.84222
2.43	10.86	2.11	7.89
3.96	4.73	2.99	7.06
4.74	6.95	1.99	4.42
2.82	6.28	0.51	7.93
4.59	6.23	2.35	5.2
0.76	2.81	1.47	6.12
0.73	4.33	0.17	3.95
		1.49	3.92
2.975	6.2575	1.57778	5.84222
SD
1.58533	2.45525	0.894061	1.57656
8	8	9	9
SE
0.198167	0.306906	0.0993401	0.175173
