# Supplementary material for: Acute sleep fragmentation does not alter pro-inflammatory cytokine gene expression in brain or peripheral tissues of leptin-deficient mice
Source: PeerJ. 2018 Feb 19;6:e4423. doi: 10.7717/peerj.4423 (PMC5822834; doi:10.7717/peerj.4423)
Supplement: Supplemental Information 9 [file peerj-06-4423-s009.xlsx]

## Sheet: Jennie OB Brain TNFa Study Stud
Plate Name: Jennie OB Brain TNFa Plate1 11.18.14
Detector	Reporter		Start	End	Threshold							TNFa
TNF-mouse	FAM		3	15	0.2							std1	5	26.3318
Well	SampleName		Ct	average CT	x for TNFa	x for 18s		relative expression				std2	0.5	29.5968
1	S1		26.4908	26.3318	4.62037	3.69959		1.24889				std3	0.05	33.0444
2	S1		26.1728									std4	0.005	36.8181
3	1	OBSD1 HYP1	32.2279	32.21	0.095659	36.5696		0.00261581				std5	0.0005
4	1	OBSD1 HYP1	32.1921
5	2	OBSD1 PRE1	32.6204	32.6123	0.0733655	34.5718		0.00212212
6	2	OBSD1 PRE1	32.6041
7	3	OBSD1 HIP1	33.2335	32.882	0.0614066	31.2058		0.0019678
8	3	OBSD1 HIP1	32.5305
9	4	OBSD1 HYP2	32.2878	32.0183	0.10855	36.5778		0.00296764
10	4	OBSD1 HYP2	31.7489
11	5	OBSD1 PRE2	34.4478	34.3621	0.0231308	7.28768		0.00317396
12	5	OBSD1 PRE2	34.2765
13	S2		30.2777	29.5968	0.536198	0.493733		1.08601
14	S2		28.916
15	6	OBSD1 HIP2	31.0597	31.6055	0.142528	31.5233		0.00452134
16	6	OBSD1 HIP2	32.1513
17	7	OBC1 HYP1	32.089	32.1726	0.0980515	26.4395		0.00370852
18	7	OBC1 HYP1	32.2561
19	8	OBC1 PRE1	34.7216	34.8286	0.017004	12.4383		0.00136707
20	8	OBC1 PRE1	34.9357
21	9	OBC1 HIP1	33.0542	32.5835	0.0747701	34.1318		0.00219063
22	9	OBC1 HIP1	32.1128
23	10	OBC1 HYP2	33.2304	33.2264	0.0489276	36.6597		0.00133464
24	10	OBC1 HYP2	33.2224
25	S3		33.7074	33.0444	0.0551668	0.0780162		0.70712
26	S3		32.3815
27	11	OBC1 PRE2	32.2832	32.6079	0.0735763	36.4807		0.00201685
28	11	OBC1 PRE2	32.9326
29	12	OBC1 HIP2	30.9643	31.1727	0.189627	33.6203		0.00564025
30	12	OBC1 HIP2	31.381
31	25	OBSD2 HYP5	32.4817	32.7988	0.0648709	37.8155		0.00171546
32	25	OBSD2 HYP5	33.1159
33	26	OBSD2 PRE5	31.4558	31.334	0.170476	39.8266		0.00428045
34	26	OBSD2 PRE5	31.2123
35	27	OBSD2 HIP5	32.0827	32.2807	0.0913033	25.8351		0.00353408
36	27	OBSD2 HIP5	32.4786
37	S4		36.1274	36.8181	0.00457747	0.0071337		0.641668
38	S4		37.5088
39	28	OBSD2 HYP6	32.184	32.1928	0.0967505	34.5727		0.00279846
40	28	OBSD2 HYP6	32.2016
41	29	OBSD2 PRE6	32.2988	32.0326	0.107534	35.9863		0.0029882
42	29	OBSD2 PRE6	31.7664
43	30	OBSD2 HIP6	31.6663	31.49	0.153816	33.4851		0.00459356
44	30	OBSD2 HIP6	31.3136
45	31	OBC2 HYP5	32.0454	32.6942	0.0695048	38.0925		0.00182463
46	31	OBC2 HYP5	33.343
47	32	OBC2 ORE5	34.1656	34.0849	0.0277726	35.9782		0.000771927
48	32	OBC2 PRE5	34.0042
49	S5					0.000308502		0
50	S5
51	33	OBC2 HIP5	32.5758	32.2698	0.0919621	34.8201		0.00264106
52	33	OBC2 HIP5	31.9637
53	34	OBC2 HYP6				0.0515077		0
54	34	OBC2 HYP6
55	35	OBC2 PRE6	32.3649	32.7746	0.0659147	36.0709		0.00182737
56	35	OBC2 PRE6	33.1843
57	36	OBC2 HIP6	32.2274	31.9995	0.109908	38.1981		0.00287731
58	36	OBC2 HIP6	31.7716
59	49	SD1 HYP4	34.8615	34.6268	0.0194256	33.159		0.000585833
60	49	SD1 HYP4	34.3921
61	50	SD1 PRE4	36.099	35.3687	0.0119077	30.952		0.000384713
62	50	SD1 PRE4	34.6385
63	51	SD1 HIP4	35.3256	35.2812	0.0126152	33.7682		0.000373581
64	51	SD1 HIP4	35.2369
65	52	C2 HYP1	35.1215	34.7621	0.0177665	31.3949		0.000565904
66	52	C2 HYP1	34.4028
67	53	C2 PRE1	34.8131	35.1572	0.0136908	14.1414		0.00096814
68	53	C2 PRE1	35.5013
69	54	C2 HIP1	33.3783	33.9022	0.0313306	26.4588		0.00118413
70	54	C2 HIP1	34.426
71	55	C2 HYP2	36.0523	35.6378	0.00997127	25.4999		0.000391032
72	55	C2 HYP2	35.2233
73	56	C2 PRE2	34.2133	34.5429	0.020531	25.3619		0.000809521
74	56	C2 PRE2	34.8725
75	57	C2 HIP2	34.1622	33.7588	0.0344378	31.5004		0.00109325
76	57	C2 HIP2	33.3554
77	58	C2 HYP3	34.9984	34.9869	0.0153185	29.0231		0.000527803
78	58	C2 HYP3	34.9754
79	59	C2 PRE3	34.3829	33.964	0.0300781	32.0531		0.000938384
80	59	C2 PRE3	33.5451
81	60	C2 HIP3	35.0359	34.6075	0.0196745	28.2907		0.000695442
82	60	C2 HIP3	34.1791
83	73	SD3 HYP4	35.4323	35.244	0.012929	31.13		0.000415322
84	73	SD3 HYP4	35.0557
85	74	SD3 PRE4	36.6862	36.1059	0.00732213	27.1445		0.000269746
86	74	SD3 PRE4	35.5257
87	75	SD3 HIP4	34.0577	35.1382	0.013863	28.9672		0.000478578
88	75	SD3 HIP4	36.2188
89	76	C3 HYP1	34.3618	34.345	0.023394	24.059		0.000972359
90	76	C3 HYP1	34.3282
91	77	C3 PRE1	34.2439	34.5647	0.0202386	29.8045		0.000679045
92	77	C3 PRE1	34.8854
93	78	C3 HIP1	35.0612	34.7011	0.0184965	22.0593		0.00083849
94	78	C3 HIP1	34.341
95	79	C3 HYP2	35.0211	34.255	0.0248248	29.3381		0.000846164
96	79	C3 HYP2	33.4889
Plate Name: Jennie OB Brain TNFa Plate1 11.18.14
Detector	Reporter		Start		Threshold							18s
18S Mouse	VIC		3		0.2							std1	5	17.8509
Well	SampleName		Ct	average CT	x for 18s							std2	0.5	21.4519
1	S1		18.2194	17.8509	3.69959							std3	0.05	24.7509
2	S1		17.4824									std4	0.005	29.028
3	1	OBSD1 HYP1	13.8055	13.7546	36.5696							std5	0.0005	34.6438
4	1	OBSD1 HYP1	13.7037
5	2	OBSD1 PRE1	13.8696	13.8551	34.5718
6	2	OBSD1 PRE1	13.8405
7	3	OBSD1 HIP1	13.9856	14.0382	31.2058
8	3	OBSD1 HIP1	14.0908
9	4	OBSD1 HYP2	13.7192	13.7542	36.5778
10	4	OBSD1 HYP2	13.7892
11	5	OBSD1 PRE2	16.537	16.6387	7.28768
12	5	OBSD1 PRE2	16.7404
13	S2		22.1292	21.4519	0.493733
14	S2		20.7746
15	6	OBSD1 HIP2	14.0232	14.0201	31.5233
16	6	OBSD1 HIP2	14.017
17	7	OBC1 HYP1	14.3186	14.3346	26.4395
18	7	OBC1 HYP1	14.3505
19	8	OBC1 PRE1	15.6997	15.6829	12.4383
20	8	OBC1 PRE1	15.666
21	9	OBC1 HIP1	13.8422	13.878	34.1318
22	9	OBC1 HIP1	13.9137
23	10	OBC1 HYP2	13.6718	13.7502	36.6597
24	10	OBC1 HYP2	13.8286
25	S3		25.0827	24.7509	0.0780162
26	S3		24.4191
27	11	OBC1 PRE2	13.8217	13.7589	36.4807
28	11	OBC1 PRE2	13.6962
29	12	OBC1 HIP2	13.922	13.9049	33.6203
30	12	OBC1 HIP2	13.8879
31	25	OBSD2 HYP5	13.6864	13.6947	37.8155
32	25	OBSD2 HYP5	13.703
33	26	OBSD2 PRE5	13.6148	13.6021	39.8266
34	26	OBSD2 PRE5	13.5893
35	27	OBSD2 HIP5	14.3279	14.3759	25.8351
36	27	OBSD2 HIP5	14.4239
37	S4		29.1557	29.028	0.0071337
38	S4		28.9002
39	28	OBSD2 HYP6	13.8787	13.855	34.5727
40	28	OBSD2 HYP6	13.8313
41	29	OBSD2 PRE6	13.7699	13.7833	35.9863
42	29	OBSD2 PRE6	13.7968
43	30	OBSD2 HIP6	14.0632	13.9122	33.4851
44	30	OBSD2 HIP6	13.7611
45	31	OBC2 HYP5	13.7005	13.6817	38.0925
46	31	OBC2 HYP5	13.6628
47	32	OBC2 ORE5	13.7724	13.7837	35.9782
48	32	OBC2 PRE5	13.7951
49	S5		34.4624	34.6438	0.000308502
50	S5		34.8252
51	33	OBC2 HIP5	13.9216	13.8422	34.8201
52	33	OBC2 HIP5	13.7629
53	34	OBC2 HYP6	26.3639	25.4932	0.0515077
54	34	OBC2 HYP6	24.6226
55	35	OBC2 PRE6	13.8362	13.7791	36.0709
56	35	OBC2 PRE6	13.7221
57	36	OBC2 HIP6	13.7064	13.6767	38.1981
58	36	OBC2 HIP6	13.647
59	49	SD1 HYP4	13.9353	13.9296	33.159
60	49	SD1 HYP4	13.924
61	50	SD1 PRE4	14.1465	14.0528	30.952
62	50	SD1 PRE4	13.9591
63	51	SD1 HIP4	14.0107	13.8971	33.7682
64	51	SD1 HIP4	13.7835
65	52	C2 HYP1	14.1665	14.0274	31.3949
66	52	C2 HYP1	13.8883
67	53	C2 PRE1	14.0156	15.4534	14.1414
68	53	C2 PRE1	16.8912
69	54	C2 HIP1	14.383	14.3332	26.4588
70	54	C2 HIP1	14.2835
71	55	C2 HYP2	14.4105	14.3993	25.4999
72	55	C2 HYP2	14.388
73	56	C2 PRE2	14.4991	14.409	25.3619
74	56	C2 PRE2	14.3188
75	57	C2 HIP2	14.0302	14.0214	31.5004
76	57	C2 HIP2	14.0126
77	58	C2 HYP3	14.165	14.1678	29.0231
78	58	C2 HYP3	14.1707
79	59	C2 PRE3	14.0273	13.9903	32.0531
80	59	C2 PRE3	13.9533
81	60	C2 HIP3	14.2435	14.2135	28.2907
82	60	C2 HIP3	14.1836
83	73	SD3 HYP4	13.9629	14.0425	31.13
84	73	SD3 HYP4	14.1222
85	74	SD3 PRE4	14.2823	14.2875	27.1445
86	74	SD3 PRE4	14.2927
87	75	SD3 HIP4	14.1705	14.1713	28.9672
88	75	SD3 HIP4	14.1721
89	76	C3 HYP1	14.1956	14.5033	24.059
90	76	C3 HYP1	14.8109
91	77	C3 PRE1	14.1497	14.1203	29.8045
92	77	C3 PRE1	14.091
93	78	C3 HIP1	14.7631	14.6584	22.0593
94	78	C3 HIP1	14.5537
95	79	C3 HYP2	14.1113	14.1486	29.3381
96	79	C3 HYP2	14.1858
Plate Name: Jennie OB Brain TNFa Plate2 11.19.14												TNFa
Detector	Reporter		Start									std1	5	26.861
TNF-mouse	FAM		3									std2	0.5	30.0388
Well	SampleName		Ct	average CT	x for TNFa	x for 18s		relative expression				std3	0.05	33.3225
1	S1		26.9923	26.861	4.61491	4.54073		1.01634				std4	0.005	37.0328
2	S1		26.7297									std5	0.0005
3	13	OB C1 HYP3	34.4906	34.669	0.0226067	33.013		0.000684782
4	13	OBC1 HYP3	34.8474
5	14	OBC1 PRE3	35.2674	34.9026	0.0192816	41.628		0.000463189
6	14	OBC1 PRE3	34.5377
7	15	OBC1 HIP3	36.0455	35.5896	0.012075	41.4576		0.00029126
8	15	OBC1 HIP3	35.1337
9	16	OBC1 HYP4	36.8236	36.5598	0.00623556	6.40378		0.000973732
10	16	OBC1 HYP4	36.2959
11	17	OBC1 PRE4	36.2026	35.9029	0.00975469	43.0731		0.000226468
12	17	OBC1 PRE4	35.6031
13	S2		30.0406	30.0388	0.52973	0.516389		1.02584
14	S2		30.0369
15	18	OBC1 HIP4	36.9552	35.8867	0.00986226	45.1711		0.000218331
16	18	OBC1 HIP4	34.8183
17	19	OBSD2 HYP3	35.5104	34.7814	0.0209397	45.3724		0.000461507
18	19	OBSD2 HYP3	34.0525
19	20	OBSD2 PRE3	35.6193	35.4823	0.0129911	45.5874		0.00028497
20	20	OBSD2 PRE3	35.3452
21	21	OBSD2 HIP3	36.3729	35.7185	0.0110599	15.5163		0.000712793
22	21	OBSD2 HIP3	35.0641
23	22	OBSD2 HYP4	35.211	34.7762	0.0210147	46.1474		0.000455382
24	22	OBSD2 HYP4	34.3414
25	S3		33.8242	33.3225	0.0565701	0.0625146		0.904909
26	S3		32.8208
27	23	OBSD2 PRE4	38.2292	37.2688	0.00384689	369410		1.04136e-08
28	23	OBSD2 PRE4	36.3084
29	24	OBSD2 HIP4	35.9272	35.8909	0.00983442	10.4987		0.000936727
30	24	OBSD2 HIP4	35.8546
31	37	OBC2 HYP7	35.4964	34.99	0.0181665	44.3041		0.000410042
32	37	OBC2 HYP7	34.4836
33	38	OBC2 PRE7	35.3576	35.3192	0.0145176	47.7375		0.000304114
34	38	OBC2 PRE7	35.2807
35	39	OBC2 HIP7	34.8268	34.4477	0.026284	41.2324		0.000637461
36	39	OBC2 HIP7	34.0687
37	S4		36.2762	37.0328	0.00451781	0.00426975		1.0581
38	S4		37.7894
39	40	SD1 HYP1	35.8895	36.0391	0.00889037	42.4307		0.000209527
40	40	SD1 HYP1	36.1886
41	41	SD1 PRE1	35.2684	34.938	0.0188222	32.0134		0.000587947
42	41	SD1 PRE1	34.6075
43	42	SD1 HIP1	35.4169	35.2441	0.0152797	43.7637		0.00034914
44	42	SD1 HIP1	35.0712
45	43	SD1 HYP2	36.3776	35.9268	0.00959684	47.7868		0.000200826
46	43	SD1 HYP2	35.476
47	44	SD1 PRE2	36.5857	36.9211	0.00487515	45.0496		0.000108217
48	44	SD1 PRE2	37.2564
49	S5			#DIV/0!	#DIV/0!	0.00706702
50	S5
51	45	SD1 HIP2	35.8916	35.7968	0.0104858	45.5446		0.000230232
52	45	SD1 HIP2	35.7019
53	46	SD1 HYP3	38.0056	36.802	0.00528699	43.1852		0.000122426
54	46	SD1 HYP3	35.5984
55	47	SD1 PRE3	36.1664	35.6931	0.0112529	45.5859		0.000246851
56	47	SD1 PRE3	35.2198
57	48	SD1 HIP3	35.3083	35.2593	0.0151223	46.8095		0.00032306
58	48	SD1 HIP3	35.2102
59	61	C2 HYP4	37.0902	36.5038	0.00647759	52.1798		0.00012414
60	61	C2 HYP4	35.9175
61	62	C2 PRE4	36.1708	36.13	0.00835629	50.8032		0.000164484
62	62	C2 PRE4	36.0892
63	63	C2 HIP4	36.3539	36.3539	0.00717422	24.006		0.000298851
64	63	C2 HIP4
65	64	SD3 HYP1	35.1739	35.374	0.0139852	52.7053		0.000265348
66	64	SD3 HYP1	35.5741
67	65	SD3 PRE1	35.2525	34.8175	0.0204317	21.0079		0.000972574
68	65	SD3 PRE1	34.3825
69	66	SD3 HIP1	34.1902	34.8331	0.0202157	51.7714		0.000390481
70	66	SD3 HIP1	35.476
71	67	SD3 HYP2	34.8144	34.7406	0.0215305	52.1194		0.0004131
72	67	SD3 HYP2	34.6668
73	68	SD3 PRE2	35.0761	35.0117	0.0179006	50.4102		0.000355098
74	68	SD3 PRE2	34.9472
75	69	SD3 HIP2	35.5996	34.9162	0.0191032	51.773		0.000368979
76	69	SD3 HIP2	34.2328
77	70	SD3 HYP3	35.4128	34.8387	0.0201388	50.6967		0.00039724
78	70	SD3 HYP3	34.2646
79	71	SD3 PRE3	34.6417	34.861	0.0198351	53.2643		0.000372391
80	71	SD3 PRE3	35.0803
81	72	SD3 HIP3	35.5877	34.9015	0.0192954	56.0496		0.000344256
82	72	SD3 HIP3	34.2153
83	80	C3 PRE2	34.5384	34.439	0.0264421	51.9939		0.00050856
84	80	C3 PRE2	34.3395
85	81	C3 HIP2	35.0078	35.2624	0.0150898	48.8671		0.000308794
86	81	C3 HIP2	35.517
87	82	C3 HYP3	35.0141	35.0394	0.0175654	53.9389		0.000325653
88	82	C3 HYP3	35.0647
89	83	C3 PPRE3	34.2298	34.0857	0.0336369	52.1619		0.000644856
90	83	C3 PRE3	33.9415
91	84	C3 HIP3	34.8269	34.8312	0.0202419	51.0855		0.000396236
92	84	C3 HIP3	34.8355
93	85	C3 HYP4	35.1854	35.4823	0.0129906	46.8755		0.00027713
94	85	C3 HYP4	35.7792
95	86	C3 PRE4	35.0534	36.2253	0.00783131	46.1922		0.000169537
96	86	C3 PRE4	37.3971
Plate Name: Jennie OB Brain TNFa Plate2 11.19.14
Detector	Reporter		Start
18S Mouse	VIC		3
Well	SampleName		Ct	average CT	x for 18s							18s
1	S1		18.3369	18.0566	4.54073							std1	5	18.0566
2	S1		17.7763									std2	0.5	21.5284
3	13	OB C1 HYP3	14.784	14.8885	33.013							std3	0.05	24.9004
4	13	OBC1 HYP3	14.9929									std4	0.005	29.1866
5	14	OBC1 PRE3	14.5272	14.5182	41.628							std5	0.0005
6	14	OBC1 PRE3	14.5091
7	15	OBC1 HIP3	14.5961	14.5247	41.4576
8	15	OBC1 HIP3	14.4533
9	16	OBC1 HYP4	17.7879	17.5076	6.40378
10	16	OBC1 HYP4	17.2272
11	17	OBC1 PRE4	14.3794	14.4637	43.0731
12	17	OBC1 PRE4	14.5479
13	S2		21.8296	21.5284	0.516389
14	S2		21.2273
15	18	OBC1 HIP4	14.5217	14.3877	45.1711
16	18	OBC1 HIP4	14.2537
17	19	OBSD2 HYP3	14.3672	14.3806	45.3724
18	19	OBSD2 HYP3	14.394
19	20	OBSD2 PRE3	14.371	14.373	45.5874
20	20	OBSD2 PRE3	14.3751
21	21	OBSD2 HIP3	15.7322	16.0942	15.5163
22	21	OBSD2 HIP3	16.4562
23	22	OBSD2 HYP4	14.2264	14.3536	46.1474
24	22	OBSD2 HYP4	14.4807
25	S3		25.2442	24.9004	0.0625146
26	S3		24.5567
27	23	OBSD2 PRE4			369410
28	23	OBSD2 PRE4
29	24	OBSD2 HIP4	16.5558	16.718	10.4987
30	24	OBSD2 HIP4	16.8803
31	37	OBC2 HYP7	14.4655	14.4186	44.3041
32	37	OBC2 HYP7	14.3718
33	38	OBC2 PRE7	14.3595	14.2995	47.7375
34	38	OBC2 PRE7	14.2394
35	39	OBC2 HIP7	14.3782	14.5334	41.2324
36	39	OBC2 HIP7	14.6886
37	S4		29.2351	29.1866	0.00426975
38	S4		29.138
39	40	SD1 HYP1	14.5524	14.4877	42.4307
40	40	SD1 HYP1	14.4229
41	41	SD1 PRE1	14.9307	14.9375	32.0134
42	41	SD1 PRE1	14.9444
43	42	SD1 HIP1	14.5508	14.4383	43.7637
44	42	SD1 HIP1	14.3257
45	43	SD1 HYP2	14.3255	14.2978	47.7868
46	43	SD1 HYP2	14.2701
47	44	SD1 PRE2	14.3465	14.392	45.0496
48	44	SD1 PRE2	14.4375
49	S5		28.3588	28.3819	0.00706702
50	S5		28.4049
51	45	SD1 HIP2	14.4451	14.3745	45.5446
52	45	SD1 HIP2	14.304
53	46	SD1 HYP3	14.4976	14.4595	43.1852
54	46	SD1 HYP3	14.4214
55	47	SD1 PRE3	14.4659	14.3731	45.5859
56	47	SD1 PRE3	14.2803
57	48	SD1 HIP3	14.3355	14.3308	46.8095
58	48	SD1 HIP3	14.3261
59	61	C2 HYP4	14.1736	14.1574	52.1798
60	61	C2 HYP4	14.1411
61	62	C2 PRE4	14.3693	14.2001	50.8032
62	62	C2 PRE4	14.0308
63	63	C2 HIP4	15.7241	15.3972	24.006
64	63	C2 HIP4	15.0704
65	64	SD3 HYP1	14.2188	14.1413	52.7053
66	64	SD3 HYP1	14.0639
67	65	SD3 PRE1	14.4303	15.6103	21.0079
68	65	SD3 PRE1	16.7903
69	66	SD3 HIP1	14.2814	14.1699	51.7714
70	66	SD3 HIP1	14.0584
71	67	SD3 HYP2	14.2197	14.1592	52.1194
72	67	SD3 HYP2	14.0987
73	68	SD3 PRE2	14.3594	14.2125	50.4102
74	68	SD3 PRE2	14.0655
75	69	SD3 HIP2	14.1572	14.1699	51.773
76	69	SD3 HIP2	14.1825
77	70	SD3 HYP3	14.2187	14.2034	50.6967
78	70	SD3 HYP3	14.1881
79	71	SD3 PRE3	14.0989	14.1245	53.2643
80	71	SD3 PRE3	14.1501
81	72	SD3 HIP3	14.0594	14.0431	56.0496
82	72	SD3 HIP3	14.0268
83	80	C3 PRE2	14.1058	14.1631	51.9939
84	80	C3 PRE2	14.2203
85	81	C3 HIP2	14.3218	14.2621	48.8671
86	81	C3 HIP2	14.2024
87	82	C3 HYP3	14.079	14.1044	53.9389
88	82	C3 HYP3	14.1298
89	83	C3 PPRE3	14.1332	14.1579	52.1619
90	83	C3 PRE3	14.1826
91	84	C3 HIP3	14.1941	14.1912	51.0855
92	84	C3 HIP3	14.1883
93	85	C3 HYP4	14.316	14.3285	46.8755
94	85	C3 HYP4	14.3411
95	86	C3 PRE4	14.3396	14.352	46.1922
96	86	C3 PRE4	14.3644
Plate Name: Jennie OB TNFa Brain and Periphery Plate3 12.4.14
Detector	Reporter		Start		Threshold							TNFa
TNF-mouse	FAM		3		0.2							std1	5	28.0948
Well	SampleName		Ct	average CT	x for TNFa	x for 18s		relative expression				std2	0.5	32.1745
1	S1		28.3122	28.0948	4.9333	5.678		0.868845				std3	0.05	36.4031
2	S1		27.8774									std4	0.005
13	S2		32.4413	32.1745	0.51402	0.558723		0.91999				std5	0.0005
14	S2		31.9078
25	S3		37.6099	36.4031	0.0493174	0.0318446		1.54869
26	S3		35.1963
37	S4			37.7253	0.023697	0.005317		4.45684
38	S4		37.7253
49	S5					0.000583343		0
50	S5
51	B88	OBSD3 HYP7	34.0155	34.0925	0.177522	65.5336		0.00270888
52	B88	OBSD3 HYP7	34.1695
53	B89	OBSD3 PRE7	34.4149	34.6637	0.129346	59.9272		0.00215839
54	B89	OBSD3 PRE7	34.9124
55	B90	OBSD3 HIP7	34.8605	34.7815	0.121167	57.1909		0.00211864
56	B90	OBSD3 HIP7	34.7025
57	B91	OBSD3 HYP8	35.3521	35.2387	0.0940384	63.6278		0.00147795
58	B91	OBSD3 HYP8	35.1254
59	B92	OBSD3 PRE8	36.3041	36.1292	0.0574035	60.9869		0.000941243
60	B92	OBSD3 PRE8	35.9543
61	B93	OBSD3 HIP8	35.9579	35.6874	0.0733347	58.9548		0.00124391
62	B93	OBSD3 HIP8	35.4168
63	B94	OBSD3 HYP9	36.1541	35.6476	0.0749664	60.6515		0.00123602
64	B94	OBSD3 HYP9	35.1412
65	B95	OBSD3 PRE9	34.598	35.1009	0.101509	60.5936		0.00167524
66	B95	OBSD3 PRE9	35.6037
67	B96	OBSD3 HIP9	34.1918	35.1422	0.0992112	25.8261		0.00384151
68	B96	OBSD3 HIP9	36.0925
69	B97	OBC3 HYP8	33.9035	34.1112	0.175687	59.504		0.00295252
70	B97	OBC3 HYP8	34.319
71	B98	OBC3 PRE8	34.2428	34.4037	0.149395	60.6534		0.00246309
72	B98	OBC3 PRE8	34.5646
73	B99	OBC3 HIP8	36.7083	36.1743	0.0559878	48.225		0.00116097
74	B99	OBC3 HIP8	35.6402
75	B100	OBC3 HYP9	34.6063	34.6167	0.132753	56.5619		0.00234704
76	B100	OBC3 HYP9	34.6272
77	B101	OBC3 PRE9	34.7665	34.728	0.124814	59.0948		0.0021121
78	B101	OBC3 PRE9	34.6895
79	B102	OBC3 HIP9	34.8785	34.8783	0.11484	56.5114		0.00203215
80	B102	OBC3 HIP9	34.878
81	B55	C2 HYP2	38.3493	37.4264	0.0279673	50.2575		0.000556481
82	B55	C2 HYP2	36.5035
Plate Name: Jennie OB TNFa Brain and Periphery Plate3 12.4.14
Detector	Reporter		Start		Threshold							18s
18S Mouse	VIC		3		0.2							std1	5	18.1435
Well	SampleName		Ct	average CT	x for 18s							std2	0.5	21.9068
1	S1		17.834	18.1435	5.678							std3	0.05	26.5563
2	S1		18.453									std4	0.005	29.4614
13	S2		22.2944	21.9068	0.558723							std5	0.0005	33.0481
14	S2		21.5191
25	S3		27.4429	26.5563	0.0318446
26	S3		25.6697
37	S4		30.1526	29.4614	0.005317
38	S4		28.7702
49	S5		33.4006	33.0481	0.000583343
50	S5		32.6955
51	B88	OBSD3 HYP7	14.1552	14.1737	65.5336
52	B88	OBSD3 HYP7	14.1922
53	B89	OBSD3 PRE7	14.3404	14.3189	59.9272
54	B89	OBSD3 PRE7	14.2973
55	B90	OBSD3 HIP7	14.4212	14.3947	57.1909
56	B90	OBSD3 HIP7	14.3682
57	B91	OBSD3 HYP8	14.2706	14.2216	63.6278
58	B91	OBSD3 HYP8	14.1726
59	B92	OBSD3 PRE8	14.2736	14.2904	60.9869
60	B92	OBSD3 PRE8	14.3072
61	B93	OBSD3 HIP8	14.39	14.3454	58.9548
62	B93	OBSD3 HIP8	14.3008
63	B94	OBSD3 HYP9	14.3208	14.2994	60.6515
64	B94	OBSD3 HYP9	14.2779
65	B95	OBSD3 PRE9	14.2815	14.3009	60.5936
66	B95	OBSD3 PRE9	14.3203
67	B96	OBSD3 HIP9	14.3768	15.685	25.8261
68	B96	OBSD3 HIP9	16.9932
69	B97	OBC3 HYP8	14.3838	14.3303	59.504
70	B97	OBC3 HYP8	14.2769
71	B98	OBC3 PRE8	14.2833	14.2993	60.6534
72	B98	OBC3 PRE8	14.3153
73	B99	OBC3 HIP8	14.7673	14.6715	48.225
74	B99	OBC3 HIP8	14.5756
75	B100	OBC3 HYP9	14.4107	14.4126	56.5619
76	B100	OBC3 HYP9	14.4146
77	B101	OBC3 PRE9	14.3213	14.3416	59.0948
78	B101	OBC3 PRE9	14.3618
79	B102	OBC3 HIP9	14.4467	14.4141	56.5114
80	B102	OBC3 HIP9	14.3815
81	B55	C2 HYP2	14.6068	14.6044	50.2575
82	B55	C2 HYP2	14.6021

## Sheet: group means
control				SD				OB control				OB SD
HYP	PRE	HIP		HYP	PRE	HIP		HYP	PRE	HIP		HYP	PRE	HIP
0.000565904	0.00096814	0.00118413		0.000209527	0.000587947	0.00034914			0.00136707	0.00219063		0.00261581	0.00212212	0.0019678
0.000391032	0.000809521	0.00109325		0.000200826		0.000230232		0.00370852	0.00201685	0.00564025			0.00317396	0.00452134
0.000556481	0.000938384	0.000695442		0.000122426	0.000246851	0.00032306		0.00133464	0.000463189	0.00029126		0.000461507	0.00028497	0.000712793
0.000527803	0.000164484	0.000298851		0.000585833	0.000384713	0.000373581		NA	0.000226468	0.000218331		0.000455382	1.04136e-08	0.000936727
0.00012414		0.00083849		0.000265348	0.000972574	0.000390481		0.000973732		0.00264106		0.00171546	0.00428045	0.00353408
0.000972359	0.000679045	0.000308794			0.000355098	0.000368979		0.00182463	0.00182737	0.00287731		0.00279846	0.0029882	0.00459356
0.000846164	0.00050856	0.000396236		0.00039724	0.000372391	0.000344256		NA	0.000304114	0.000637461		0.00270888	0.00215839	0.00211864
	0.000169537			0.000415322	0.000269746	0.000478578		0.000410042	0.00246309	0.00116097		0.00147795	0.000941243	0.00124391
0.00027713								0.00295252	0.0021121	0.00203215		0.00123602	0.00167524	0.00384151
								0.00234704
0.413971	0.548928			0.437119	0.264936			0.635828	0.610264			1.13483
0.000532626	0.000605382	0.000687885		0.000313789	0.000455617	0.000357288		0.00193588	0.00134753	0.00196549		0.00168368	0.00195829	0.00260782
Standard Deviation								Standard Deviation
control				SD				OB control				OB SD
0.000279172	0.000337468	0.000368202		0.000160145	0.000253293	6.9453e-05		0.00124703	0.000897234	0.00169976		0.000956839	0.001403	0.00153613
Sample Size								Sample Size
8	7	7		7	7	8		7	8	9		8	9	9
Standard Error								Standard Error
9.87022e-05	0.000127551	0.000139167		6.05292e-05	9.57359e-05	2.45554e-05		0.000471332	0.00031722	0.000566585		0.000338294	0.000467666	0.000512043

## Sheet: graph
	control	HSF	OB control	OB HSF
Hypothalamus	0.000532626	0.000313789	0.00193588	0.00168368
Prefrontal Cortex	0.000605382	0.000455617	0.00134753	0.00195829
Hippocampus	0.000687885	0.000357288	0.00196549	0.00260782
	OB control	OB HSF
Hyp	0.00193588	0.00168368
Pre	0.00134753	0.00195829
Hip	0.00196549	0.00260782
Standard Error
	control	HSF	OB control	OB HSF
Hyp	9.87022e-05	6.05292e-05	0.000471332	0.000338294
Pre	0.000127551	9.57359e-05	0.00031722	0.000467666
Hip	0.000139167	2.45554e-05	0.000566585	0.000512043
	hyp	pre	hip
control	9.87022e-05	0.000127551	0.000139167
hsf	6.05292e-05	9.57359e-05	2.45554e-05
ob control	0.000471332	0.00031722	0.000566585
ob hsf	0.000338294	0.000467666	0.000512043

## Sheet: copy
69	54	C2 HIP1	33.3783	33.9022	0.0313306	26.4588		0.00118413
70	54	C2 HIP1	34.426
69	54	C2 HIP1	14.383	14.3332	26.4588
70	54	C2 HIP1	14.2835
75	57	C2 HIP2	34.1622	33.7588	0.0344378	31.5004		0.00109325
76	57	C2 HIP2	33.3554
75	57	C2 HIP2	14.0302	14.0214	31.5004
76	57	C2 HIP2	14.0126
81	60	C2 HIP3	35.0359	34.6075	0.0196745	28.2907		0.000695442
82	60	C2 HIP3	34.1791
81	60	C2 HIP3	14.2435	14.2135	28.2907
82	60	C2 HIP3	14.1836
63	63	C2 HIP4	36.3539	36.3539	0.00717422	24.006		0.000298851
64	63	C2 HIP4
63	63	C2 HIP4	15.7241	15.3972	24.006
64	63	C2 HIP4	15.0704
65	52	C2 HYP1	35.1215	34.7621	0.0177665	31.3949		0.000565904
66	52	C2 HYP1	34.4028
65	52	C2 HYP1	14.1665	14.0274	31.3949
66	52	C2 HYP1	13.8883
71	55	C2 HYP2	36.0523	35.6378	0.00997127	25.4999		0.000391032
72	55	C2 HYP2	35.2233
71	55	C2 HYP2	14.4105	14.3993	25.4999
72	55	C2 HYP2	14.388
81	B55	C2 HYP2	38.3493	37.4264	0.0279673	50.2575		0.000556481
82	B55	C2 HYP2	36.5035
77	58	C2 HYP3	34.9984	34.9869	0.0153185	29.0231		0.000527803
78	58	C2 HYP3	34.9754
77	58	C2 HYP3	14.165	14.1678	29.0231
78	58	C2 HYP3	14.1707
59	61	C2 HYP4	37.0902	36.5038	0.00647759	52.1798		0.00012414
60	61	C2 HYP4	35.9175
59	61	C2 HYP4	14.1736	14.1574	52.1798
60	61	C2 HYP4	14.1411
67	53	C2 PRE1	34.8131	35.1572	0.0136908	14.1414		0.00096814
68	53	C2 PRE1	35.5013
67	53	C2 PRE1	14.0156	15.4534	14.1414
68	53	C2 PRE1	16.8912
73	56	C2 PRE2	34.2133	34.5429	0.020531	25.3619		0.000809521
74	56	C2 PRE2	34.8725
73	56	C2 PRE2	14.4991	14.409	25.3619
74	56	C2 PRE2	14.3188
79	59	C2 PRE3	34.3829	33.964	0.0300781	32.0531		0.000938384
80	59	C2 PRE3	33.5451
79	59	C2 PRE3	14.0273	13.9903	32.0531
80	59	C2 PRE3	13.9533
61	62	C2 PRE4	36.1708	36.13	0.00835629	50.8032		0.000164484
62	62	C2 PRE4	36.0892
61	62	C2 PRE4	14.3693	14.2001	50.8032
62	62	C2 PRE4	14.0308
93	78	C3 HIP1	35.0612	34.7011	0.0184965	22.0593		0.00083849
94	78	C3 HIP1	34.341
93	78	C3 HIP1	14.7631	14.6584	22.0593
94	78	C3 HIP1	14.5537
85	81	C3 HIP2	35.0078	35.2624	0.0150898	48.8671		0.000308794
86	81	C3 HIP2	35.517
85	81	C3 HIP2	14.3218	14.2621	48.8671
86	81	C3 HIP2	14.2024
91	84	C3 HIP3	34.8269	34.8312	0.0202419	51.0855		0.000396236
92	84	C3 HIP3	34.8355
91	84	C3 HIP3	14.1941	14.1912	51.0855
92	84	C3 HIP3	14.1883
89	76	C3 HYP1	34.3618	34.345	0.023394	24.059		0.000972359
90	76	C3 HYP1	34.3282
89	76	C3 HYP1	14.1956	14.5033	24.059
90	76	C3 HYP1	14.8109
95	79	C3 HYP2	35.0211	34.255	0.0248248	29.3381		0.000846164
96	79	C3 HYP2	33.4889
95	79	C3 HYP2	14.1113	14.1486	29.3381
96	79	C3 HYP2	14.1858
87	82	C3 HYP3	35.0141	24.5465	22.3291	53.9389		0.413971
87	82	C3 HYP3	14.079	24.5719	0.0767967
88	82	C3 HYP3	35.0647
88	82	C3 HYP3	14.1298
93	85	C3 HYP4	35.1854	35.4823	0.0129906	46.8755		0.00027713
94	85	C3 HYP4	35.7792
93	85	C3 HYP4	14.316	14.3285	46.8755
94	85	C3 HYP4	14.3411
89	83	C3 PPRE3	34.2298	24.1815	28.6331	52.1619		0.548928
89	83	C3 PPRE3	14.1332	24.1885	0.097629
91	77	C3 PRE1	34.2439	34.5647	0.0202386	29.8045		0.000679045
92	77	C3 PRE1	34.8854
91	77	C3 PRE1	14.1497	14.1203	29.8045
92	77	C3 PRE1	14.091
83	80	C3 PRE2	34.5384	34.439	0.0264421	51.9939		0.00050856
84	80	C3 PRE2	34.3395
83	80	C3 PRE2	14.1058	14.1631	51.9939
84	80	C3 PRE2	14.2203
90	83	C3 PRE3	33.9415
90	83	C3 PRE3	14.1826
95	86	C3 PRE4	35.0534	36.2253	0.00783131	46.1922		0.000169537
96	86	C3 PRE4	37.3971
95	86	C3 PRE4	14.3396	14.352	46.1922
96	86	C3 PRE4	14.3644
3	13	OB C1 HYP3	34.4906	24.6373	20.9906	33.013		0.635828
3	13	OB C1 HYP3	14.784	23.9191	0.115572
21	9	OBC1 HIP1	33.0542	32.5835	0.0747701	34.1318		0.00219063
22	9	OBC1 HIP1	32.1128
21	9	OBC1 HIP1	13.8422	13.878	34.1318
22	9	OBC1 HIP1	13.9137
29	12	OBC1 HIP2	30.9643	31.1727	0.189627	33.6203		0.00564025
30	12	OBC1 HIP2	31.381
29	12	OBC1 HIP2	13.922	13.9049	33.6203
30	12	OBC1 HIP2	13.8879
7	15	OBC1 HIP3	36.0455	35.5896	0.012075	41.4576		0.00029126
8	15	OBC1 HIP3	35.1337
7	15	OBC1 HIP3	14.5961	14.5247	41.4576
8	15	OBC1 HIP3	14.4533
15	18	OBC1 HIP4	36.9552	35.8867	0.00986226	45.1711		0.000218331
16	18	OBC1 HIP4	34.8183
15	18	OBC1 HIP4	14.5217	14.3877	45.1711
16	18	OBC1 HIP4	14.2537
17	7	OBC1 HYP1	32.089	32.1726	0.0980515	26.4395		0.00370852
18	7	OBC1 HYP1	32.2561
17	7	OBC1 HYP1	14.3186	14.3346	26.4395
18	7	OBC1 HYP1	14.3505
23	10	OBC1 HYP2	33.2304	33.2264	0.0489276	36.6597		0.00133464
24	10	OBC1 HYP2	33.2224
23	10	OBC1 HYP2	13.6718	13.7502	36.6597
24	10	OBC1 HYP2	13.8286
4	13	OBC1 HYP3	34.8474
4	13	OBC1 HYP3	14.9929
9	16	OBC1 HYP4	36.8236	36.5598	0.00623556	6.40378		0.000973732
10	16	OBC1 HYP4	36.2959
9	16	OBC1 HYP4	17.7879	17.5076	6.40378
10	16	OBC1 HYP4	17.2272
19	8	OBC1 PRE1	34.7216	34.8286	0.017004	12.4383		0.00136707
20	8	OBC1 PRE1	34.9357
19	8	OBC1 PRE1	15.6997	15.6829	12.4383
20	8	OBC1 PRE1	15.666
27	11	OBC1 PRE2	32.2832	32.6079	0.0735763	36.4807		0.00201685
28	11	OBC1 PRE2	32.9326
27	11	OBC1 PRE2	13.8217	13.7589	36.4807
28	11	OBC1 PRE2	13.6962
5	14	OBC1 PRE3	35.2674	34.9026	0.0192816	41.628		0.000463189
6	14	OBC1 PRE3	34.5377
5	14	OBC1 PRE3	14.5272	14.5182	41.628
6	14	OBC1 PRE3	14.5091
11	17	OBC1 PRE4	36.2026	35.9029	0.00975469	43.0731		0.000226468
12	17	OBC1 PRE4	35.6031
11	17	OBC1 PRE4	14.3794	14.4637	43.0731
12	17	OBC1 PRE4	14.5479
51	33	OBC2 HIP5	32.5758	32.2698	0.0919621	34.8201		0.00264106
52	33	OBC2 HIP5	31.9637
51	33	OBC2 HIP5	13.9216	13.8422	34.8201
52	33	OBC2 HIP5	13.7629
57	36	OBC2 HIP6	32.2274	31.9995	0.109908	38.1981		0.00287731
58	36	OBC2 HIP6	31.7716
57	36	OBC2 HIP6	13.7064	13.6767	38.1981
58	36	OBC2 HIP6	13.647
35	39	OBC2 HIP7	34.8268	34.4477	0.026284	41.2324		0.000637461
36	39	OBC2 HIP7	34.0687
35	39	OBC2 HIP7	14.3782	14.5334	41.2324
36	39	OBC2 HIP7	14.6886
45	31	OBC2 HYP5	32.0454	32.6942	0.0695048	38.0925		0.00182463
46	31	OBC2 HYP5	33.343
45	31	OBC2 HYP5	13.7005	13.6817	38.0925
46	31	OBC2 HYP5	13.6628
53	34	OBC2 HYP6				0.0515077		0
54	34	OBC2 HYP6
53	34	OBC2 HYP6	26.3639	25.4932	0.0515077
54	34	OBC2 HYP6	24.6226
31	37	OBC2 HYP7	35.4964	34.99	0.0181665	44.3041		0.000410042
32	37	OBC2 HYP7	34.4836
31	37	OBC2 HYP7	14.4655	14.4186	44.3041
32	37	OBC2 HYP7	14.3718
47	32	OBC2 ORE5	34.1656	23.969	21.9562	35.9782		0.610264
47	32	OBC2 ORE5	13.7724	23.8883	0.126388
48	32	OBC2 PRE5	34.0042
48	32	OBC2 PRE5	13.7951
55	35	OBC2 PRE6	32.3649	32.7746	0.0659147	36.0709		0.00182737
56	35	OBC2 PRE6	33.1843
55	35	OBC2 PRE6	13.8362	13.7791	36.0709
56	35	OBC2 PRE6	13.7221
33	38	OBC2 PRE7	35.3576	35.3192	0.0145176	47.7375		0.000304114
34	38	OBC2 PRE7	35.2807
33	38	OBC2 PRE7	14.3595	14.2995	47.7375
34	38	OBC2 PRE7	14.2394
73	B99	OBC3 HIP8	36.7083	36.1743	0.0559878	48.225		0.00116097
74	B99	OBC3 HIP8	35.6402
79	B102	OBC3 HIP9	34.8785	34.8783	0.11484	56.5114		0.00203215
80	B102	OBC3 HIP9	34.878
69	B97	OBC3 HYP8	33.9035	34.1112	0.175687	59.504		0.00295252
70	B97	OBC3 HYP8	34.319
75	B100	OBC3 HYP9	34.6063	34.6167	0.132753	56.5619		0.00234704
76	B100	OBC3 HYP9	34.6272
71	B98	OBC3 PRE8	34.2428	34.4037	0.149395	60.6534		0.00246309
72	B98	OBC3 PRE8	34.5646
77	B101	OBC3 PRE9	34.7665	34.728	0.124814	59.0948		0.0021121
78	B101	OBC3 PRE9	34.6895
7	3	OBSD1 HIP1	33.2335	32.882	0.0614066	31.2058		0.0019678
8	3	OBSD1 HIP1	32.5305
7	3	OBSD1 HIP1	13.9856	14.0382	31.2058
8	3	OBSD1 HIP1	14.0908
15	6	OBSD1 HIP2	31.0597	31.6055	0.142528	31.5233		0.00452134
16	6	OBSD1 HIP2	32.1513
15	6	OBSD1 HIP2	14.0232	14.0201	31.5233
16	6	OBSD1 HIP2	14.017
3	1	OBSD1 HYP1	32.2279	32.21	0.095659	36.5696		0.00261581
4	1	OBSD1 HYP1	32.1921
3	1	OBSD1 HYP1	13.8055	13.7546	36.5696
4	1	OBSD1 HYP1	13.7037
9	4	OBSD1 HYP2	32.2878	23.0035	41.5095	36.5778		1.13483
9	4	OBSD1 HYP2	13.7192	22.734	0.241027
10	4	OBSD1 HYP2	31.7489
10	4	OBSD1 HYP2	13.7892
5	2	OBSD1 PRE1	32.6204	32.6123	0.0733655	34.5718		0.00212212
6	2	OBSD1 PRE1	32.6041
5	2	OBSD1 PRE1	13.8696	13.8551	34.5718
6	2	OBSD1 PRE1	13.8405
11	5	OBSD1 PRE2	34.4478	34.3621	0.0231308	7.28768		0.00317396
12	5	OBSD1 PRE2	34.2765
11	5	OBSD1 PRE2	16.537	16.6387	7.28768
12	5	OBSD1 PRE2	16.7404
21	21	OBSD2 HIP3	36.3729	35.7185	0.0110599	15.5163		0.000712793
22	21	OBSD2 HIP3	35.0641
21	21	OBSD2 HIP3	15.7322	16.0942	15.5163
22	21	OBSD2 HIP3	16.4562
29	24	OBSD2 HIP4	35.9272	35.8909	0.00983442	10.4987		0.000936727
30	24	OBSD2 HIP4	35.8546
29	24	OBSD2 HIP4	16.5558	16.718	10.4987
30	24	OBSD2 HIP4	16.8803
35	27	OBSD2 HIP5	32.0827	32.2807	0.0913033	25.8351		0.00353408
36	27	OBSD2 HIP5	32.4786
35	27	OBSD2 HIP5	14.3279	14.3759	25.8351
36	27	OBSD2 HIP5	14.4239
43	30	OBSD2 HIP6	31.6663	31.49	0.153816	33.4851		0.00459356
44	30	OBSD2 HIP6	31.3136
43	30	OBSD2 HIP6	14.0632	13.9122	33.4851
44	30	OBSD2 HIP6	13.7611
17	19	OBSD2 HYP3	35.5104	34.7814	0.0209397	45.3724		0.000461507
18	19	OBSD2 HYP3	34.0525
17	19	OBSD2 HYP3	14.3672	14.3806	45.3724
18	19	OBSD2 HYP3	14.394
23	22	OBSD2 HYP4	35.211	34.7762	0.0210147	46.1474		0.000455382
24	22	OBSD2 HYP4	34.3414
23	22	OBSD2 HYP4	14.2264	14.3536	46.1474
24	22	OBSD2 HYP4	14.4807
31	25	OBSD2 HYP5	32.4817	32.7988	0.0648709	37.8155		0.00171546
32	25	OBSD2 HYP5	33.1159
31	25	OBSD2 HYP5	13.6864	13.6947	37.8155
32	25	OBSD2 HYP5	13.703
39	28	OBSD2 HYP6	32.184	32.1928	0.0967505	34.5727		0.00279846
40	28	OBSD2 HYP6	32.2016
39	28	OBSD2 HYP6	13.8787	13.855	34.5727
40	28	OBSD2 HYP6	13.8313
19	20	OBSD2 PRE3	35.6193	35.4823	0.0129911	45.5874		0.00028497
20	20	OBSD2 PRE3	35.3452
19	20	OBSD2 PRE3	14.371	14.373	45.5874
20	20	OBSD2 PRE3	14.3751
27	23	OBSD2 PRE4	38.2292	37.2688	0.00384689	369410		1.04136e-08
28	23	OBSD2 PRE4	36.3084
27	23	OBSD2 PRE4			369410
28	23	OBSD2 PRE4
33	26	OBSD2 PRE5	31.4558	31.334	0.170476	39.8266		0.00428045
34	26	OBSD2 PRE5	31.2123
33	26	OBSD2 PRE5	13.6148	13.6021	39.8266
34	26	OBSD2 PRE5	13.5893
41	29	OBSD2 PRE6	32.2988	32.0326	0.107534	35.9863		0.0029882
42	29	OBSD2 PRE6	31.7664
41	29	OBSD2 PRE6	13.7699	13.7833	35.9863
42	29	OBSD2 PRE6	13.7968
55	B90	OBSD3 HIP7	34.8605	34.7815	0.121167	57.1909		0.00211864
56	B90	OBSD3 HIP7	34.7025
61	B93	OBSD3 HIP8	35.9579	35.6874	0.0733347	58.9548		0.00124391
62	B93	OBSD3 HIP8	35.4168
67	B96	OBSD3 HIP9	34.1918	35.1422	0.0992112	25.8261		0.00384151
68	B96	OBSD3 HIP9	36.0925
51	B88	OBSD3 HYP7	34.0155	34.0925	0.177522	65.5336		0.00270888
52	B88	OBSD3 HYP7	34.1695
57	B91	OBSD3 HYP8	35.3521	35.2387	0.0940384	63.6278		0.00147795
58	B91	OBSD3 HYP8	35.1254
63	B94	OBSD3 HYP9	36.1541	35.6476	0.0749664	60.6515		0.00123602
64	B94	OBSD3 HYP9	35.1412
53	B89	OBSD3 PRE7	34.4149	34.6637	0.129346	59.9272		0.00215839
54	B89	OBSD3 PRE7	34.9124
59	B92	OBSD3 PRE8	36.3041	36.1292	0.0574035	60.9869		0.000941243
60	B92	OBSD3 PRE8	35.9543
65	B95	OBSD3 PRE9	34.598	35.1009	0.101509	60.5936		0.00167524
66	B95	OBSD3 PRE9	35.6037
43	42	SD1 HIP1	35.4169	35.2441	0.0152797	43.7637		0.00034914
44	42	SD1 HIP1	35.0712
43	42	SD1 HIP1	14.5508	14.4383	43.7637
44	42	SD1 HIP1	14.3257
51	45	SD1 HIP2	35.8916	35.7968	0.0104858	45.5446		0.000230232
52	45	SD1 HIP2	35.7019
51	45	SD1 HIP2	14.4451	14.3745	45.5446
52	45	SD1 HIP2	14.304
57	48	SD1 HIP3	35.3083	35.2593	0.0151223	46.8095		0.00032306
58	48	SD1 HIP3	35.2102
57	48	SD1 HIP3	14.3355	14.3308	46.8095
58	48	SD1 HIP3	14.3261
63	51	SD1 HIP4	35.3256	35.2812	0.0126152	33.7682		0.000373581
64	51	SD1 HIP4	35.2369
63	51	SD1 HIP4	14.0107	13.8971	33.7682
64	51	SD1 HIP4	13.7835
39	40	SD1 HYP1	35.8895	36.0391	0.00889037	42.4307		0.000209527
40	40	SD1 HYP1	36.1886
39	40	SD1 HYP1	14.5524	14.4877	42.4307
40	40	SD1 HYP1	14.4229
45	43	SD1 HYP2	36.3776	35.9268	0.00959684	47.7868		0.000200826
46	43	SD1 HYP2	35.476
45	43	SD1 HYP2	14.3255	14.2978	47.7868
46	43	SD1 HYP2	14.2701
53	46	SD1 HYP3	38.0056	36.802	0.00528699	43.1852		0.000122426
54	46	SD1 HYP3	35.5984
53	46	SD1 HYP3	14.4976	14.4595	43.1852
54	46	SD1 HYP3	14.4214
59	49	SD1 HYP4	34.8615	34.6268	0.0194256	33.159		0.000585833
60	49	SD1 HYP4	34.3921
59	49	SD1 HYP4	13.9353	13.9296	33.159
60	49	SD1 HYP4	13.924
41	41	SD1 PRE1	35.2684	34.938	0.0188222	32.0134		0.000587947
42	41	SD1 PRE1	34.6075
41	41	SD1 PRE1	14.9307	14.9375	32.0134
42	41	SD1 PRE1	14.9444
47	44	SD1 PRE2	36.5857	25.4661	11.9352	45.0496		0.264936
47	44	SD1 PRE2	14.3465	25.8014	0.0355599
48	44	SD1 PRE2	37.2564
48	44	SD1 PRE2	14.4375
55	47	SD1 PRE3	36.1664	35.6931	0.0112529	45.5859		0.000246851
56	47	SD1 PRE3	35.2198
55	47	SD1 PRE3	14.4659	14.3731	45.5859
56	47	SD1 PRE3	14.2803
61	50	SD1 PRE4	36.099	35.3687	0.0119077	30.952		0.000384713
62	50	SD1 PRE4	34.6385
61	50	SD1 PRE4	14.1465	14.0528	30.952
62	50	SD1 PRE4	13.9591
69	66	SD3 HIP1	34.1902	34.8331	0.0202157	51.7714		0.000390481
70	66	SD3 HIP1	35.476
69	66	SD3 HIP1	14.2814	14.1699	51.7714
70	66	SD3 HIP1	14.0584
75	69	SD3 HIP2	35.5996	34.9162	0.0191032	51.773		0.000368979
76	69	SD3 HIP2	34.2328
75	69	SD3 HIP2	14.1572	14.1699	51.773
76	69	SD3 HIP2	14.1825
81	72	SD3 HIP3	35.5877	34.9015	0.0192954	56.0496		0.000344256
82	72	SD3 HIP3	34.2153
81	72	SD3 HIP3	14.0594	14.0431	56.0496
82	72	SD3 HIP3	14.0268
87	75	SD3 HIP4	34.0577	35.1382	0.013863	28.9672		0.000478578
88	75	SD3 HIP4	36.2188
87	75	SD3 HIP4	14.1705	14.1713	28.9672
88	75	SD3 HIP4	14.1721
65	64	SD3 HYP1	35.1739	35.374	0.0139852	52.7053		0.000265348
66	64	SD3 HYP1	35.5741
65	64	SD3 HYP1	14.2188	14.1413	52.7053
66	64	SD3 HYP1	14.0639
71	67	SD3 HYP2	34.8144	24.517	22.7824	52.1194		0.437119
71	67	SD3 HYP2	14.2197	24.4432	0.0832366
72	67	SD3 HYP2	34.6668
72	67	SD3 HYP2	14.0987
77	70	SD3 HYP3	35.4128	34.8387	0.0201388	50.6967		0.00039724
78	70	SD3 HYP3	34.2646
77	70	SD3 HYP3	14.2187	14.2034	50.6967
78	70	SD3 HYP3	14.1881
83	73	SD3 HYP4	35.4323	35.244	0.012929	31.13		0.000415322
84	73	SD3 HYP4	35.0557
83	73	SD3 HYP4	13.9629	14.0425	31.13
84	73	SD3 HYP4	14.1222
67	65	SD3 PRE1	35.2525	34.8175	0.0204317	21.0079		0.000972574
68	65	SD3 PRE1	34.3825
67	65	SD3 PRE1	14.4303	15.6103	21.0079
68	65	SD3 PRE1	16.7903
73	68	SD3 PRE2	35.0761	35.0117	0.0179006	50.4102		0.000355098
74	68	SD3 PRE2	34.9472
73	68	SD3 PRE2	14.3594	14.2125	50.4102
74	68	SD3 PRE2	14.0655
79	71	SD3 PRE3	34.6417	34.861	0.0198351	53.2643		0.000372391
80	71	SD3 PRE3	35.0803
79	71	SD3 PRE3	14.0989	14.1245	53.2643
80	71	SD3 PRE3	14.1501
85	74	SD3 PRE4	36.6862	36.1059	0.00732213	27.1445		0.000269746
86	74	SD3 PRE4	35.5257
85	74	SD3 PRE4	14.2823	14.2875	27.1445
86	74	SD3 PRE4	14.2927
TNF-mouse	FAM		3	15	0.2
Well	SampleName		Ct	average CT	x for TNFa	x for 18s		relative expression
1	S1		26.4908	26.3318	4.62037	3.69959		1.24889
2	S1		26.1728
13	S2		30.2777	29.5968	0.536198	0.493733		1.08601
14	S2		28.916
25	S3		33.7074	33.0444	0.0551668	0.0780162		0.70712
26	S3		32.3815
37	S4		36.1274	36.8181	0.00457747	0.0071337		0.641668
38	S4		37.5088
49	S5					0.000308502		0
50	S5
Plate Name: Jennie OB Brain TNFa Plate1 11.18.14
Detector	Reporter		Start		Threshold
18S Mouse	VIC		3		0.2
Well	SampleName		Ct	average CT	x for 18s
1	S1		18.2194	17.8509	3.69959
2	S1		17.4824
13	S2		22.1292	21.4519	0.493733
14	S2		20.7746
25	S3		25.0827	24.7509	0.0780162
26	S3		24.4191
37	S4		29.1557	29.028	0.0071337
38	S4		28.9002
49	S5		34.4624	34.6438	0.000308502
50	S5		34.8252
Plate Name: Jennie OB Brain TNFa Plate2 11.19.14
Detector	Reporter		Start
TNF-mouse	FAM		3
Well	SampleName		Ct	average CT	x for TNFa	x for 18s		relative expression
1	S1		26.9923	26.861	4.61491	4.54073		1.01634
2	S1		26.7297
13	S2		30.0406	30.0388	0.52973	0.516389		1.02584
14	S2		30.0369
25	S3		33.8242	33.3225	0.0565701	0.0625146		0.904909
26	S3		32.8208
37	S4		36.2762	37.0328	0.00451781	0.00426975		1.0581
38	S4		37.7894
49	S5			#DIV/0!	#DIV/0!	0.00706702
50	S5
Plate Name: Jennie OB Brain TNFa Plate2 11.19.14
Detector	Reporter		Start
18S Mouse	VIC		3
Well	SampleName		Ct	average CT	x for 18s
1	S1		18.3369	18.0566	4.54073
2	S1		17.7763
13	S2		21.8296	21.5284	0.516389
14	S2		21.2273
25	S3		25.2442	24.9004	0.0625146
26	S3		24.5567
37	S4		29.2351	29.1866	0.00426975
38	S4		29.138
49	S5		28.3588	28.3819	0.00706702
50	S5		28.4049
Plate Name: Jennie OB TNFa Brain and Periphery Plate3 12.4.14
Detector	Reporter		Start		Threshold
TNF-mouse	FAM		3		0.2
Well	SampleName		Ct	average CT	x for TNFa	x for 18s		relative expression
1	S1		28.3122	28.0948	4.9333	5.678		0.868845
2	S1		27.8774
13	S2		32.4413	32.1745	0.51402	0.558723		0.91999
14	S2		31.9078
25	S3		37.6099	36.4031	0.0493174	0.0318446		1.54869
26	S3		35.1963
37	S4			37.7253	0.023697	0.005317		4.45684
38	S4		37.7253
49	S5					0.000583343		0
50	S5
