# Supplementary material for: Acute sleep fragmentation does not alter pro-inflammatory cytokine gene expression in brain or peripheral tissues of leptin-deficient mice
Source: PeerJ. 2018 Feb 19;6:e4423. doi: 10.7717/peerj.4423 (PMC5822834; doi:10.7717/peerj.4423)
Supplement: Supplemental Information 10 [file peerj-06-4423-s010.xlsx]

## Sheet: Jennie OB TNFa Periphery Study 
Plate Name: Jennie OB Periphery TNFa Plate1 11.11.14
Detector	Reporter			Start	End	Threshold							TNFa
TNF-mouse	FAM			3	15	0.2							std1	5	27.7497
Well	SampleName			Ct	Average CT	x for TNF	x for 18s		relative expression				std2	0.5	31.1948
1	S1			27.761	27.7497	4.39666	4.02797		1.09153				std3	0.05	35.0423
2	S1			27.7384									std4	0.005	39.3665
3	1		OBSD1 L1	35.4391	35.5791	0.0417214	26.3944		0.00158069				std5	0.0005
4	1		OBSD1 L1	35.7191
5	2		OBSD1 S1	30.2979	30.1724	1.04041	26.8407		0.0387626
6	2		OBSD1 S1	30.0469
7	3		OBSD1 F1	32.0712	31.9069	0.370746	29.9052		0.0123974
8	3		OBSD1 F1	31.7427
9	4		OBSD1 L2	35.1121	34.9982	0.058942	26.9102		0.00219032
10	4		OBSD1 L2	34.8844
11	5		OBSD1 S2	31.1902	30.899	0.675283	19.5266		0.0345827
12	5		OBSD1 S2	30.6078
13	S2			31.3498	31.1948	0.566306	0.562879		1.00609
14	S2			31.0399
15	6		OBSD1 F2	30.7458	30.639	0.788239	11.5232		0.0684043
16	6		OBSD1 F2	30.5322
17	7		OBC1 L1	35.3624	35.4306	0.0455748	14.1838		0.00321315
18	7		OBC1 L1	35.4988
19	8		OBC1 S1	32.4263	32.3362	0.287204	3.79002		0.0757791
20	8		OBC1 S1	32.246
21	9		OBC1 F1	31.4335	31.2955	0.533378	17.8181		0.0299346
22	9		OBC1 F1	31.1576
23	10		OBC1 L2	34.6727	34.6144	0.0740596	20.9956		0.00352739
24	10		OBC1 L2	34.5562
25	S3			35.0401	35.0423	0.0574158	0.0553013		1.03824
26	S3			35.0446
27	11		OBC1 S2	35.0174	34.9261	0.0615251	1.50459		0.0408917
28	11		OBC1 S2	34.8349
29	12		OBC1 F2	30.7546	30.5387	0.836727	27.1858		0.0307781
30	12		OBC1 F2	30.3227
31	25		OBSD2 L5	38.7135	38.3106	0.00821629	4.88831		0.00168081
32	25		OBSD2 L5	37.9076
33	26		OBSD2 S5	32.0595	31.9075	0.370625	8.4745		0.0437342
34	26		OBSD2 S5	31.7555
35	27		OBSD2 F5	31.908	31.863	0.380568	24.4322		0.0155765
36	27		OBSD2 F5	31.818
37	S4			39.6698	39.3665	0.00438396	0.00679632		0.645049
38	S4			39.0632
39	28		OBC2 L5	34.3362	34.3747	0.0854151	23.864		0.00357924
40	28		OBC2 L5	34.4131
41	29		OBC2 S5	28.926	28.8502	2.2845	25.5606		0.0893757
42	29		OBC2 S5	28.7745
43	30		OBC2 F5	29.7514	29.8201	1.28303	25.5392		0.0502377
44	30		OBC2 F5	29.8887
45	31		OBC2 L6	33.725	33.8079	0.119666	30.3518		0.00394262
46	31		OBC2 L6	33.8907
47	32		OBC2 S6	32.391	32.2792	0.297101	5.66519		0.0524433
48	32		OBC2 S6	32.1674
49	S5						0.000367441
50	S5
51	33		OBC2 F6	30.0118	30.0188	1.13996	27.4398		0.041544
52	33		OBC2 F6	30.0258
53	34		OBC2 L7	33.3026	33.2401	0.167746	26.6813		0.00628702
54	34		OBC2 L7	33.1776
55	35		OBC2 S7	31.7016	31.6041	0.443922	10.0392		0.044219
56	35		OBC2 S7	31.5067
57	36		OBC2 F7	30.4535	30.5041	0.854077	27.0462		0.0315784
58	36		OBC2 F7	30.5548
59	49		C2 L1	36.5883	36.6692	0.0218142	24.1709		0.0009025
60	49		C2 L1	36.75
61	50		C2 S1	32.4875	32.404	0.275843	5.5394		0.0497965
62	50		C2 S1	32.3205
63	51		C2 F1	31.6071	31.5112	0.469174	18.4083		0.025487
64	51		C2 F1	31.4152
65	52		C2 L2		39.3907	0.0043213	17.1934		0.000251334
66	52		C2 L2	39.3907
67	53		C2 S2	33.4536	33.4814	0.145315	5.47306		0.0265509
68	53		C2 S2	33.5092
69	54		C2 F2	33.521	33.6349	0.132637	26.565		0.00499293
70	54		C2 F2	33.7487
71	55		C2 L3	38.2873	38.3529	0.00801165	19.2331		0.000416556
72	55		C2 L3	38.4186
73	56		C2 S3	34.7103	34.4634	0.0810201	0.628093		0.128994
74	56		C2 S3	34.2166
75	57		C2 F3	30.8539	30.8901	0.678868	8.49554		0.0799087
76	57		C2 F3	30.9263
77	58		C2 L4	35.3263	35.4025	0.0463431	16.7245		0.00277097
78	58		C2 L4	35.4787
79	59		C2 S4				0.0309197
80	59		C2 S4
81	60		C2 F4	33.1748	33.1992	0.171882	14.0268		0.0122538
82	60		C2 F4	33.2235
83	73		C3 L1	38.3021	37.5632	0.0128158	3.46989		0.00369342
84	73		C3 L1	36.8244
85	74		C3 S1	33.8247	33.6492	0.13151	0.0841936		1.56199
86	74		C3 S1	33.4737
87	75		C3 F1	31.2112	31.2032	0.5635	20.709		0.0272105
88	75		C3 F1	31.1952
89	76		C3 L2	37.2246	37.1653	0.0162394	11.0491		0.00146975
90	76		C3 L2	37.1059
91	77		C3 S2	34.5505	34.4503	0.0816564	1.78878		0.0456491
92	77		C3 S2	34.3501
93	78		C3 F2	32.4047	32.4183	0.273506	24.1963		0.0113036
94	78		C3 F2	32.4319
95	79		C3 L3	37.3619	37.1006	0.0168761	20.1397		0.000837951
96	79		C3 L3	36.8393									18s
Plate Name: Jennie OB Periphery TNFa Plate1 11.11.14													std1	5	18.0435
Detector	Reporter			Start		Threshold							std2	0.5	21.6941
18S Mouse	VIC			3		0.2							std3	0.05	25.9981
Well	SampleName			Ct	Average CT	x for 18s							std4	0.005	29.887
1	S1			18.1436	18.0435	4.02797							std5	0.0005	35.2991
2	S1			17.9434
3	1		OBSD1 L1	14.5951	14.5563	26.3944
4	1		OBSD1 L1	14.5175
5	2		OBSD1 S1	14.6457	14.5252	26.8407
6	2		OBSD1 S1	14.4047
7	3		OBSD1 F1	14.3449	14.3247	29.9052
8	3		OBSD1 F1	14.3044
9	4		OBSD1 L2	14.5542	14.5204	26.9102
10	4		OBSD1 L2	14.4866
11	5		OBSD1 S2	15.3337	15.1153	19.5266
12	5		OBSD1 S2	14.897
13	S2			21.9253	21.6941	0.562879
14	S2			21.4628
15	6		OBSD1 F2	16.134	16.0937	11.5232
16	6		OBSD1 F2	16.0534
17	7		OBC1 L1	15.7452	15.7083	14.1838
18	7		OBC1 L1	15.6715
19	8		OBC1 S1	18.177	18.1564	3.79002
20	8		OBC1 S1	18.1359
21	9		OBC1 F1	15.3059	15.2852	17.8181
22	9		OBC1 F1	15.2645
23	10		OBC1 L2	14.8968	14.9808	20.9956
24	10		OBC1 L2	15.0648
25	S3			26.0292	25.9981	0.0553013
26	S3			25.9671
27	11		OBC1 S2	19.9458	19.8702	1.50459
28	11		OBC1 S2	19.7946
29	12		OBC1 F2	14.5877	14.5015	27.1858
30	12		OBC1 F2	14.4153
31	25		OBSD2 L5	17.7365	17.6844	4.88831
32	25		OBSD2 L5	17.6323
33	26		OBSD2 S5	16.797	16.6638	8.4745
34	26		OBSD2 S5	16.5305
35	27		OBSD2 F5	14.7213	14.6996	24.4322
36	27		OBSD2 F5	14.6779
37	S4			29.9267	29.887	0.00679632
38	S4			29.8473
39	28		OBC2 L5	14.8422	14.7432	23.864
40	28		OBC2 L5	14.6443
41	29		OBC2 S5	14.6031	14.6159	25.5606
42	29		OBC2 S5	14.6286
43	30		OBC2 F5	14.7031	14.6174	25.5392
44	30		OBC2 F5	14.5317
45	31		OBC2 L6	14.2926	14.2972	30.3518
46	31		OBC2 L6	14.3017
47	32		OBC2 S6	17.4094	17.4108	5.66519
48	32		OBC2 S6	17.4122
49	S5			35.2549	35.2991	0.000367441
50	S5			35.3433
51	33		OBC2 F6	14.5738	14.4842	27.4398
52	33		OBC2 F6	14.3947
53	34		OBC2 L7	14.534	14.5363	26.6813
54	34		OBC2 L7	14.5385
55	35		OBC2 S7	16.3509	16.3494	10.0392
56	35		OBC2 S7	16.348
57	36		OBC2 F7	14.5078	14.5111	27.0462
58	36		OBC2 F7	14.5143
59	49		C2 L1	14.6657	14.7195	24.1709
60	49		C2 L1	14.7734
61	50		C2 S1	17.3939	17.4524	5.5394
62	50		C2 S1	17.511
63	51		C2 F1	15.2163	15.2248	18.4083
64	51		C2 F1	15.2332
65	52		C2 L2	15.3992	15.3514	17.1934
66	52		C2 L2	15.3036
67	53		C2 S2	17.3976	17.4748	5.47306
68	53		C2 S2	17.552
69	54		C2 F2	14.5603	14.5443	26.565
70	54		C2 F2	14.5284
71	55		C2 L3	15.1158	15.1434	19.2331
72	55		C2 L3	15.1711
73	56		C2 S3	21.5431	21.4907	0.628093
74	56		C2 S3	21.4383
75	57		C2 F3	16.6882	16.6591	8.49554
76	57		C2 F3	16.6301
77	58		C2 L4	15.392	15.4027	16.7245
78	58		C2 L4	15.4134
79	59		C2 S4	27.0811	27.0767	0.0309197
80	59		C2 S4	27.0722
81	60		C2 F4	15.8422	15.729	14.0268
82	60		C2 F4	15.6158
83	73		C3 L1	18.3709	18.3201	3.46989
84	73		C3 L1	18.2694
85	74		C3 S1	25.292	25.2185	0.0841936
86	74		C3 S1	25.1449
87	75		C3 F1	14.9467	15.0063	20.709
88	75		C3 F1	15.0659
89	76		C3 L2	16.1144	16.1716	11.0491
90	76		C3 L2	16.2289
91	77		C3 S2	19.518	19.5493	1.78878
92	77		C3 S2	19.5805
93	78		C3 F2	14.7246	14.7176	24.1963
94	78		C3 F2	14.7106
95	79		C3 L3	15.0837	15.058	20.1397
96	79		C3 L3	15.0323
Plate Name: Jennie OB Periphery TNFa Plate2 11.12.14
Detector	Reporter			Start		Threshold
TNF-mouse	FAM			3		0.2
Well	SampleName			Ct	Average CT	x for TNF	x for 18s		relative expression				TNFa
1	S1			27.5107	27.1527	5.44571	4.19116		1.29933				std1	5	27.1527
2	S1			26.7946									std2	0.5	30.7111
3	13		OBC1 L3	35.3049	33.0072	0.0884579	2.14881		0.041166				std3	0.05	33.8523
4	13		OBC1 L3	30.7096									std4	0.005	37.0089
5	14		OBC1 S3	31.4282	31.2313	0.308694	0.708458		0.435726				std5	0.0005
6	14		OBC1 S3	31.0343
7	15		OBC1 F3	32.3734	31.5385	0.248671	0.116724		2.13042
8	15		OBC1 F3	30.7036
9	16		OBC1 L4	29.9785	28.6613	1.88353	1.6004		1.17691
10	16		OBC1 L4	27.3441
11	17		OBC1 S4	29.3944	29.4685	1.0673	3.58597		0.297632
12	17		OBC1 S4	29.5425
13	S2			31.3314	30.7111	0.445143	0.423499		1.05111
14	S2			30.0908
15	18		OBC1 F4	28.4767	28.3754	2.3033	17.8731		0.128869
16	18		OBC1 F4	28.2741
17	19		OBSD2 L3	28.5981	30.0195	0.724194	10.4314		0.0694242
18	19		OBSD2 L3	31.441
19	20		OBSD2 S3	27.3892	26.7215	7.37607	18.3628		0.401686
20	20		OBSD2 S3	26.0538
21	21		OBSD2 F3	30.8935	30.6667	0.459271	6.75529		0.0679869
22	21		OBSD2 F3	30.4399
23	22		OBSD2 L4	29.9673	30.7999	0.418177	20.9168		0.0199923
24	22		OBSD2 L4	31.6325
25	S3			34.4265	33.8523	0.0488053	0.072214		0.675843
26	S3			33.2781
27	23		OBSD2 S4	26.8477	26.4867	8.70133	14.9845		0.580689
28	23		OBSD2 S4	26.1257
29	24		OBSD2 F4	30.3074	29.7325	0.886309	26.42		0.033547
30	24		OBSD2 F4	29.1576
31	37		SD1 L1	30.3097	31.3292	0.288122	25.239		0.0114158
32	37		SD1 L1	32.3488
33	38		SD1 S1	29.5424	29.2806	1.21814	6.62693		0.183817
34	38		SD1 S1	29.0188
35	39		SD1 F1	28.5023	28.7452	1.7756	14.7848		0.120097
36	39		SD1 F1	28.988
37	S4			37.4453	37.0089	0.00529351	0.00796554		0.664551
38	S4			36.5724
39	40		SD1 L2	36.0757	36.0499	0.0103946	3.45541		0.00300821
40	40		SD1 L2	36.0242
41	41		SD1 S2				0.00228741		0
42	41		SD1 S2
43	42		SD1 F2	30.5559	30.37	0.565912	3.66695		0.154328
44	42		SD1 F2	30.1841
45	43		SD1 L3	33.2644	33.4108	0.0665911	21.3579		0.00311788
46	43		SD1 L3	33.5571
47	44		SD1 S3	29.0754	29.3203	1.18458	9.71106		0.121982
48	44		SD1 S3	29.5652
49	S5						0.000304708
50	S5
51	45		SD1 F3	28.3565	27.8298	3.38154	20.2653		0.166863
52	45		SD1 F3	27.303
53	46		SD1 L4	31.1486	31.7615	0.212547	19.1264		0.0111128
54	46		SD1 L4	32.3745
55	47		SD1 S4		36.6924	0.00661392	0.0270611		0.244407
56	47		SD1 S4	36.6924
57	48		SD1 F4	28.9975	29.1349	1.34962	22.0463		0.0612177
58	48		SD1 F4	29.2724
59	61		SD3 L1				0.0656355
60	61		SD3 L1
61	62		SD3 S1	32.6199	32.7356	0.107096	0.399484		0.268087
62	62		SD3 S1	32.8512
63	63		SD3 F1	30.877	31.2668	0.301056	1.04336		0.288544
64	63		SD3 F1	31.6567
65	64		SD3 L2	34.7466	34.8479	0.0242198	12.0577		0.00200866
66	64		SD3 L2	34.9493
67	65		SD3 S2	31.7502	31.6218	0.234513	3.5122		0.0667708
68	65		SD3 S2	31.4934
69	66		SD3 F2	33.339	33.3098	0.071494	6.69571		0.0106776
70	66		SD3 F2	33.2806
71	67		SD3 L3	34.2352	34.6952	0.0269684	21.8378		0.00123494
72	67		SD3 L3	35.1552
73	68		SD3 S3	34.6402	34.3346	0.0347587	0.683085		0.050885
74	68		SD3 S3	34.029
75	69		SD3 F3	33.3458	33.217	0.0763188	0.466679		0.163536
76	69		SD3 F3	33.0882
77	70		SD3 L4				0.0178744
78	70		SD3 L4
79	71		SD3 S4	31.372	31.1714	0.321985	4.41805		0.0728793
80	71		SD3 S4	30.9707
81	72		SD3 F4	33.5296	33.3542	0.0692946	0.0942813		0.734978
82	72		SD3 F4	33.1788
83	80		C3 S3	36.4753	36.0485	0.0104056	1.06377		0.0097818
84	80		C3 S3	35.6216
85	81		C3 F3	31.7926	31.7259	0.217954	21.1137		0.0103229
86	81		C3 F3	31.6591
87	82		C3 L4		37.8516	0.00292535	9.37801		0.000311937
88	82		C3 L4	37.8516
89	83		C3 S4	30.5463	30.0082	0.730028	18.7705		0.0388924
90	83		C3 S4	29.47
91	84		C3 F4	31.5501	31.4168	0.270906	18.8136		0.0143995
92	84		C3 F4	31.2835
Plate Name: Jennie OB Periphery TNFa Plate2 11.12.14
Detector	Reporter			Start		Threshold
18S Mouse	VIC			3		0.2
Well	SampleName			Ct	Average CT	x for 18s							18s
1	S1			18.9905	18.5406	4.19116							std1	5	18.5406
2	S1			18.0907									std2	0.5	22.8361
3	13		OBC1 L3	20.7809	19.7925	2.14881							std3	0.05	26.1511
4	13		OBC1 L3	18.8042									std4	0.005	30.2824
5	14		OBC1 S3	22.753	21.8719	0.708458							std5	0.0005	36.3982
6	14		OBC1 S3	20.9908
7	15		OBC1 F3	25.7658	25.2512	0.116724
8	15		OBC1 F3	24.7367
9	16		OBC1 L4	20.7923	20.3448	1.6004
10	16		OBC1 L4	19.8972
11	17		OBC1 S4	19.2046	18.8329	3.58597
12	17		OBC1 S4	18.4611
13	S2			23.661	22.8361	0.423499
14	S2			22.0113
15	18		OBC1 F4	15.883	15.8227	17.8731
16	18		OBC1 F4	15.7624
17	19		OBSD2 L3	16.9874	16.8318	10.4314
18	19		OBSD2 L3	16.6762
19	20		OBSD2 S3	15.8821	15.7721	18.3628
20	20		OBSD2 S3	15.662
21	21		OBSD2 F3	17.2709	17.6461	6.75529
22	21		OBSD2 F3	18.0212
23	22		OBSD2 L4	15.4789	15.528	20.9168
24	22		OBSD2 L4	15.5771
25	S3			27.0308	26.1511	0.072214
26	S3			25.2714
27	23		OBSD2 S4	16.446	16.1531	14.9845
28	23		OBSD2 S4	15.8601
29	24		OBSD2 F4	15.1444	15.0903	26.42
30	24		OBSD2 F4	15.0362
31	37		SD1 L1	15.2382	15.176	25.239
32	37		SD1 L1	15.1138
33	38		SD1 S1	17.9543	17.682	6.62693
34	38		SD1 S1	17.4097
35	39		SD1 F1	16.0552	16.1782	14.7848
36	39		SD1 F1	16.3012
37	S4			31.3829	30.2824	0.00796554
38	S4			29.1818
39	40		SD1 L2	19.1889	18.9023	3.45541
40	40		SD1 L2	18.6158
41	41		SD1 S2	32.4144	32.6206	0.00228741
42	41		SD1 S2	32.8267
43	42		SD1 F2	18.9377	18.791	3.66695
44	42		SD1 F2	18.6443
45	43		SD1 L3	15.4853	15.4889	21.3579
46	43		SD1 L3	15.4925
47	44		SD1 S3	17.0583	16.9659	9.71106
48	44		SD1 S3	16.8735
49	S5			36.6558	36.3982	0.000304708
50	S5			36.1406
51	45		SD1 F3	15.7049	15.5873	20.2653
52	45		SD1 F3	15.4697
53	46		SD1 L4	15.6929	15.6957	19.1264
54	46		SD1 L4	15.6985
55	47		SD1 S4	28.1964	27.9905	0.0270611
56	47		SD1 S4	27.7846
57	48		SD1 F4	15.3993	15.4294	22.0463
58	48		SD1 F4	15.4596
59	61		SD3 L1	26.7974	26.3301	0.0656355
60	61		SD3 L1	25.8628
61	62		SD3 S1	23.2265	22.9456	0.399484
62	62		SD3 S1	22.6646
63	63		SD3 F1	21.273	21.1465	1.04336
64	63		SD3 F1	21.0199
65	64		SD3 L2	16.6605	16.5603	12.0577
66	64		SD3 L2	16.4601
67	65		SD3 S2	18.9517	18.8718	3.5122
68	65		SD3 S2	18.7919
69	66		SD3 F2	17.7884	17.6626	6.69571
70	66		SD3 F2	17.5369
71	67		SD3 L3	15.5018	15.4473	21.8378
72	67		SD3 L3	15.3927
73	68		SD3 S3	22.0525	21.9402	0.683085
74	68		SD3 S3	21.828
75	69		SD3 F3	22.665	22.6542	0.466679
76	69		SD3 F3	22.6434
77	70		SD3 L4	29.4572	28.7677	0.0178744
78	70		SD3 L4	28.0782
79	71		SD3 S4	18.8091	18.4418	4.41805
80	71		SD3 S4	18.0745
81	72		SD3 F4	26.2173	25.6514	0.0942813
82	72		SD3 F4	25.0855
83	80		C3 S3	21.7066	21.1102	1.06377
84	80		C3 S3	20.5137
85	81		C3 F3	15.6149	15.5105	21.1137
86	81		C3 F3	15.406
87	82		C3 L4	17.2364	17.0313	9.37801
88	82		C3 L4	16.8262
89	83		C3 S4	16.0211	15.7309	18.7705
90	83		C3 S4	15.4407
91	84		C3 F4	15.8065	15.7266	18.8136
92	84		C3 F4	15.6467
Plate Name: Jennie OB TNFa Brain and Periphery Plate3 12.4.14
Detector	Reporter			Start		Threshold
TNF-mouse	FAM			3		0.2
Well	SampleName			Ct	Average CT	x for TNF	x for 18s		relative expression				TNFa
1	S1			28.5244	28.3112	7.18178	5.63407		1.27471				std1	5	28.3112
2	S1			28.098									std2	0.5	32.3868
3	85		OBSD3 L7	36.5656	36.6244	0.023061	0.0199051		1.15855				std3	0.05	36.6427
4	85		OBSD3 L7	36.6832									std4	0.005	38.0046
5	86		OBSD3 S7	31.1274	31.1474	1.01296	0.181182		5.59085				std5	0.0005
6	86		OBSD3 S7	31.1673
7	87		OBSD3 F7	31.6019	31.4963	0.796038	0.0413944		19.2306
8	87		OBSD3 F7	31.3907
9	88		OBSD3 L8	35.3714	35.2576	0.0592677	0.0259254		2.28609
10	88		OBSD3 L8	35.1438
11	89		OBSD3 S8	30.7195	30.9249	1.18117	0.138826		8.5083
12	89		OBSD3 S8	31.1303
13	S2			32.6611	32.3868	0.430362	0.563035		0.764361
14	S2			32.1126
15	90		OBSD3 L9	39.6909	39.6909	0.00277429	0.148422		0.0186919
16	90		OBSD3 L9
17	91		OBSD3 S9	37.1737	36.7463	0.0211998	0.368118		0.0575896
18	91		OBSD3 S9	36.3188
19	92		OBSD3 F9	32.4471	32.2662	0.467757	0.0282991		16.529
20	92		OBSD3 F9	32.0853
21	93		OBC3 L8	37.2931	36.9515	0.0183987	0.0329124		0.55902
22	93		OBC3 L8	36.6098
23	94		OBC3 S8	32.7829	32.6427	0.36066	0.252293		1.42953
24	94		OBC3 S8	32.5025
25	S3			37.8731	36.6427	0.0227722	0.0318833		0.714235
26	S3			35.4122
27	95		OBC3 F8	31.3607	31.3045	0.908751	0.0348854		26.0496
28	95		OBC3 F8	31.2484
29	96		OBC3 L9				0.0155141
30	96		OBC3 L9
31	97		OBC3 S9	33.0324	33.2039	0.24479	0.277726		0.881407
32	97		OBC3 S9	33.3753
33	98		OBC3 F9	31.9409	31.8662	0.616582	0.0268317		22.9796
34	98		OBC3 F9	31.7915
35	99		OBSD3 F8	31.1957	31.2233	0.961201	41.1712		0.0233465
36	99		OBSD3 F8	31.2509
37	S4				38.0046	0.00889034	0.00533269		1.66714
38	S4			38.0046
49	S5						0.000577163
50	S5
Plate Name: Jennie OB TNFa Brain and Periphery Plate3 12.4.14													18s
Detector	Reporter			Start	End	Threshold							std1	5	18.4707
18S Mouse	VIC			3	15	0.2							std2	0.5	22.1974
Well	SampleName			Ct	average CT	x for 18s							std3	0.05	26.8431		average CT from plate 3 of IL-1B
1	S1			18.1288	18.4707	5.63407							std4	0.005	29.7364		17.8712
2	S1			18.8127									std5	0.0005	33.334
3	85			27.5348	27.6054	0.0199051											26.5272
4	85			27.6759
5	86			24.0842	24.032	0.181182											23.64
6	86			23.9797
7	87			26.4539	26.4207	0.0413944											25.9015
8	87			26.3875
9	88			27.2471	27.1778	0.0259254											26.6015
10	88			27.1085
11	89			24.4186	24.4628	0.138826											24.1826
12	89			24.507
13	S2			22.5792	22.1974	0.563035											21.7886
14	S2			21.8156
15	90			24.4373	24.3546	0.148422											23.9149
16	90			24.272
17	91			22.8895	22.885	0.368118											22.196
18	91			22.8804
19	92			27.0455	27.036	0.0282991											26.4409
20	92			27.0266
21	93			26.846	26.7917	0.0329124											26.2057
22	93			26.7374
23	94			23.3943	23.4962	0.252293											23.1445
24	94			23.5982
25	S3			27.7288	26.8431	0.0318833											26.221
26	S3			25.9574
27	95			26.8424	26.6975	0.0348854											26.2455
28	95			26.5526
29	96			28.3021	28.0086	0.0155141											27.0949
30	96			27.7151
31	97			23.3462	23.3408	0.277726											22.928
32	97			23.3355
33	98			27.1231	27.1222	0.0268317											26.4175
34	98			27.1213
35	99			15.257	15.2527	41.1712											15.1436
36	99			15.2484
37	S4			30.4197	29.7364	0.00533269											29.2597
38	S4			29.0532
49	S5			33.6793	33.334	0.000577163											32.7274
50	S5			32.9888
Plate Name: Jennie OB Periphery Plate3 Redo 12.9.14
Detector	Reporter		Start	End	Threshold
TNF-mouse	FAM		3	15	0.2
Well	SampleName		Ct	Average Ct	x for TNF	x for 18s			relative expression			TNF
7	S1		29.4202	29.0243	4.46954	5.42513			0.823858			std1	5	29.0243
8	S1		28.6285									std2	0.5	32.1744
9	88	OBSD3 L8	34.8899	34.5956	0.13801	47.2194			0.00292274			std3	0.05	36.4035
10	88	OBSD3 L8	34.3014									std4	0.005
11	96	OBC3 L9	36.2355	36.4326	0.0438452	29.156			0.00150381			std5	0.0005
12	96	OBC3 L9	36.6297
19	S2		32.6357	32.1744	0.625623	0.630376			0.992459
20	S2		31.713
21	89	OBSD3 S8	30.1215	29.7676	2.81042	49.0226			0.057329
22	89	OBSD3 S8	29.4137
23	97	OBC3 S9	32.1447	31.7647	0.807917	8.53841			0.0946214
24	97	OBC3 S9	31.3847
31	S3		37.1246	36.4035	0.0446489	0.0316356			1.41135
32	S3		35.6824
33	90	OBSD3 L9			3.30084e+08	0.0939723
34	90	OBSD3 L9
35	98	OBC3 F9	31.2176	30.8635	1.418	51.7409			0.0274059
36	98	OBC3 F9	30.5094
43	S4			#DIV/0!	#DIV/0!	0.00450218			#DIV/0!
44	S4
45	91	OBSD3 S9	35.5797	35.2093	0.0940919	2.85243			0.0329866
46	91	OBSD3 S9	34.8389
55	S5			#DIV/0!	#DIV/0!	0.00064106			#DIV/0!
56	S5
57	92	OBSD3 F9	31.9255	31.5405	0.92925	52.6567			0.0176473
58	92	OBSD3 F9	31.1556
67	85	OBSD3 L7	35.1203	35.3089	0.0884174	41.4693			0.00213212
68	85	OBSD3 L7	35.4976
69	93	OBC3 L8	36.1799	35.8866	0.0616509	42.044			0.00146634
70	93	OBC3 L8	35.5933
79	86	OBSD3 S7	30.7136	30.4822	1.79906	41.836			0.0430028
80	86	OBSD3 S7	30.2508
81	94	OBC3 S8	32.1967	31.6075	0.891188	20.4804			0.0435143
82	94	OBC3 S8	31.0184
91	87	OBSD3 F7	30.5531	30.4447	1.84173	45.5432			0.0404392
92	87	OBSD3 F7	30.3362
93	95	OBC3 F8	31.2765	30.6819	1.58821	48.4831			0.0327581
94	95	OBC3 F8	30.0873
Plate Name: Jennie OB Periphery Plate3 Redo 12.9.14
Detector	Reporter		Start	3	Threshold							18s
18S Mouse	VIC		3		0.2							std1	5	17.7133
Well	SampleName		Ct	Average Ct	x for 18s							std2	0.5	21.1853
7	S1		18.2101	17.7133	5.42513							std3	0.05	26.0114
8	S1		17.2166									std4	0.005	29.1563
9	88	OBSD3 L8	14.2357	14.2232	47.2194							std5	0.0005	32.3004
10	88	OBSD3 L8	14.2107
11	96	OBC3 L9	14.9843	15.0009	29.156
12	96	OBC3 L9	15.0175
19	S2		21.7929	21.1853	0.630376
20	S2		20.5777
21	89	OBSD3 S8	14.2361	14.1627	49.0226
22	89	OBSD3 S8	14.0894
23	97	OBC3 S9	17.1256	16.9818	8.53841
24	97	OBC3 S9	16.838
31	S3		26.7265	26.0114	0.0316356
32	S3		25.2964
33	90	OBSD3 L9	24.7744	24.2553	0.0939723
34	90	OBSD3 L9	23.7363
35	98	OBC3 F9	14.1473	14.0757	51.7409
36	98	OBC3 F9	14.0041
43	S4		29.7961	29.1563	0.00450218
44	S4		28.5166
45	91	OBSD3 S9	19.0549	18.7503	2.85243
46	91	OBSD3 S9	18.4457
55	S5		32.6282	32.3004	0.00064106
56	S5		31.9726
57	92	OBSD3 F9	14.1276	14.0474	52.6567
58	92	OBSD3 F9	13.9672
67	85	OBSD3 L7	14.5505	14.4326	41.4693
68	85	OBSD3 L7	14.3148
69	93	OBC3 L8	14.43	14.4105	42.044
70	93	OBC3 L8	14.3909
79	86	OBSD3 S7	14.5266	14.4184	41.836
80	86	OBSD3 S7	14.3103
81	94	OBC3 S8	16.1302	15.5706	20.4804
82	94	OBC3 S8	15.011
91	87	OBSD3 F7	14.308	14.2815	45.5432
92	87	OBSD3 F7	14.255
93	95	OBC3 F8	14.2965	14.1806	48.4831
94	95	OBC3 F8	14.0647

## Sheet: group means
control				SD				OB control				OB SD
LIV	SPL	FAT		LIV	SPL	FAT		LIV	SPL	FAT		LIV	SPL	FAT
0.0009025	0.0497965	0.025487		0.00158069	0.0387626	0.0123974		0.00321315	0.0757791	0.0299346		0.00158069	0.0387626	0.0123974
0.000251334	0.0265509	0.00499293		0.00219032	0.0345827	0.0684043		0.00352739	0.0408917	0.0307781		0.00219032	0.0345827	0.0684043
0.000416556	0.128994	0.0799087		0.00311788	0.121982	0.166863		0.041166	0.435726			0.0694242	0.401686	0.0679869
0.00277097	NA	0.0122538		0.0111128	0.244407	0.0612177			0.297632	0.128869		0.0199923	0.580689	0.033547
0.00369342	1.56199	0.0272105		NA	0.268087	0.288544		0.00357924	0.0893757	0.0502377		0.00168081	0.0437342	0.0155765
0.00146975	0.0456491	0.0113036		0.00200866	0.0667708	0.0106776		0.00394262	0.0524433	0.041544		NA	NA	NA
0.000837951	0.0097818	0.0103229		0.00123494	0.050885	0.163536		0.00628702	0.044219	0.0315784		0.00213212	0.0430028	0.0404392
0.000311937	0.0388924	0.0143995		NA	0.0728793	0.734978		0.00146634	0.0435143	0.0327581		0.00292274	0.057329	0.0233465
								0.00150381	0.0946214	0.0274059		NA	0.0329866	0.0176473
0.0013318	0.265951	0.0232349		0.00354088	0.112295	0.188327		0.00808569	0.130467	0.0466383		0.0142748	0.154097	0.0349181
								1.17691		2.13042
Standard Deviation								Standard Deviation
control				SD				OB control				OB SD
0.00126157	0.572746	0.0241226		0.00376415	0.0930915	0.239939		0.0134519	0.139733	0.0340604		0.0252199	0.213615	0.0225537
Sample Size								Sample Size
8	7	8		6	8	8		8	9	8		7	8	8
Standard Error								Standard Error
0.000446032	0.216478	0.00852861		0.00153671	0.0329128	0.0848312		0.00475595	0.0465777	0.0120422		0.00953221	0.0755244	0.00797395

## Sheet: graph
	control	HSF	OB control	OB HSF										control	HSF	OB control	OB HSF
liver	0.0013318	0.00354088	0.00808569	0.0142748									spleen	0.265951	0.112295	0.130467	0.154097
spleen	0.265951	0.112295	0.130467	0.154097									fat	0.0232349	0.188327	0.0466383	0.0349181
fat	0.0232349	0.188327	0.0466383	0.0349181
	OB control	OB HSF
liver	0.00808569	0.0142748
spleen	0.130467	0.154097
fat	0.0466383	0.0349181
Standard Error
	control	HSF	OB control	OB HSF
liver	0.000446032	0.00153671	0.00475595	0.00953221
spleen	0.216478	0.0329128	0.0465777	0.0755244
fat	0.00852861	0.0848312	0.0120422	0.00797395
	liver	spleen	fat
control	0.000446032	0.216478	0.00852861
HSF	0.00153671	0.0329128	0.0848312
OB control	0.00475595	0.0465777	0.0120422
OB HSF	0.00953221	0.0755244	0.00797395
