# Supplementary material for: Acute sleep fragmentation does not alter pro-inflammatory cytokine gene expression in brain or peripheral tissues of leptin-deficient mice
Source: PeerJ. 2018 Feb 19;6:e4423. doi: 10.7717/peerj.4423 (PMC5822834; doi:10.7717/peerj.4423)
Supplement: Supplemental Information 11 [file peerj-06-4423-s011.xlsx]

## Sheet: Jennie OB TGFB1 Periphery Study
Plate Name: Jennie OB Periphery TGFB1 Plate1 11.13.14												TGFB1
Detector	Reporter		Start	End	Threshold							std1	5	23.5945
Tgfb1- Mouse	FAM		3	15	0.2							std2	0.5	27.2444
Well	SampleName		Ct	average CT	x for TFGB	x for 18s		relative expression				std3	0.05	30.7456
1	S1		23.9148	23.5945	4.86802	4.31893		1.12713				std4	0.005	34.6877
2	S1		23.2741									std5	0.0005
3	1	OBSD1 L1	30.2069	30.1355	0.0810127	26.6811		0.00303633
4	1	OBSD1 L1	30.0641
5	2	OBSD1 S1	23.9914	23.873	4.08886	28.8189		0.141881
6	2	OBSD1 S1	23.7546
7	3	OBSD1 F1	24.0867	23.9497	3.89712	31.4995		0.12372
8	3	OBSD1 F1	23.8127
9	4	OBSD1 L2	29.2839	29.3019	0.136535	28.5902		0.0047756
10	4	OBSD1 L2	29.3199
11	5	OBSD1 S2	24.4019	24.6176	2.56515	21.2866		0.120505
12	5	OBSD1 S2	24.8333
13	S2		27.838	27.2444	0.495188	0.449054		1.10274
14	S2		26.6508
15	6	OBSD1 F2	25.1879	25.1218	1.87067	10.7222		0.174468
16	6	OBSD1 F2	25.0557
17	7	OBC1 L1	30.0779	29.9883	0.0888348	13.2218		0.00671882
18	7	OBC1 L1	29.8987
19	8	OBC1 S1	26.7819	26.6809	0.70471	4.34706		0.162112
20	8	OBC1 S1	26.5799
21	9	OBC1 F1	25.722	25.5677	1.41499	19.0847		0.0741425
22	9	OBC1 F1	25.4133
23	10	OBC1 L2	28.5489	28.4237	0.236628	23.409		0.0101084
24	10	OBC1 L2	28.2985
25	S3		31.0819	30.7456	0.0552909	0.062648		0.882564
26	S3		30.4092
27	11	OBC1 S2	29.31	29.2981	0.136861	1.62411		0.0842683
28	11	OBC1 S2	29.2862
29	12	OBC1 F2	24.5606	24.5049	2.7528	28.9742		0.0950085
30	12	OBC1 F2	24.4491
31	25	OBSD2 L5	31.9518	31.9969	0.0252547	6.22001		0.00406024
32	25	OBSD2 L5	32.0421
33	26	OBSD2 S5	26.1994	26.1841	0.961861	8.46376		0.113645
34	26	OBSD2 S5	26.1688
35	27	OBSD2 F5	25.4235	25.4869	1.48842	25.0581		0.0593987
36	27	OBSD2 F5	25.5502
37	S4		35.0925	34.6877	0.00468392	0.00789011		0.593645
38	S4		34.2829
39	28	OBC2 L5	29.1714	28.9857	0.166431	23.8746		0.00697106
40	28	OBC2 L5	28.8
41	29	OBC2 S5	23.8289	23.7861	4.31752	25.0735		0.172195
42	29	OBC2 S5	23.7433
43	30	OBC2 F5	24.6454	24.3697	2.99599	24.6765		0.121411
44	30	OBC2 F5	24.0939
45	31	OBC2 L6	27.9737	27.7321	0.364886	31.7621		0.0114881
46	31	OBC2 L6	27.4904
47	32	OBC2 S6	27.5318	27.0001	0.577058	6.27308		0.0919896
48	32	OBC2 S6	26.4683
49	S5					0.000325177		0
50	S5
51	33	OBC2 F6	25.0906	24.6946	2.44433	27.1028		0.0901872
52	33	OBC2 F6	24.2987
53	34	OBC2 L7	27.7591	27.425	0.442239	27.4768		0.016095
54	34	OBC2 L7	27.0909
55	35	OBC2 S7	26.1082	26.2634	0.915294	10.2828		0.0890121
56	35	OBC2 S7	26.4185
57	36	OBC2 F7	25.0009	24.9787	2.04604	27.6611		0.073968
58	36	OBC2 F7	24.9565
59	61	C2 L1	39.2464	39.1671	0.000283433	0.0625382		0.00453216
60	61	C2 L1	39.0879
61	50	C2 S1	27.9153	27.6178	0.391934	5.59714		0.0700239
62	50	C2 S1	27.3204
63	51	C2 F1	26.9816	26.4383	0.820347	18.2803		0.0448761
64	51	C2 F1	25.8949
65	52	C2 L2	33.5236	32.9321	0.0140616	18.9776		0.000740958
66	52	C2 L2	32.3406
67	53	C2 S2	28.9859	28.5834	0.214117	5.29238		0.0404576
68	53	C2 S2	28.1808
69	54	C2 F2	26.3823	25.8647	1.17482	28.2183		0.0416332
70	54	C2 F2	25.3471
71	55	C2 L3	33.2213	33.0238	0.0132765	21.4025		0.000620324
72	55	C2 L3	32.8264
73	56	C2 S3	29.5354	29.3888	0.129304	0.665835		0.194199
74	56	C2 S3	29.2422
75	57	C2 F3	24.5051	24.6883	2.45399	9.92651		0.247216
76	57	C2 F3	24.8716
77	58	C2 L4	31.0263	30.6899	0.0572515	16.8612		0.00339547
78	58	C2 L4	30.3535
79	59	C2 S4				0.0290983		0
80	59	C2 S4
81	60	C2 F4	27.7131	27.4959	0.423048	15.1554		0.027914
82	60	C2 F4	27.2786
83	73	C3 L1	31.5271	31.5438	0.0335398	3.61885		0.00926809
84	73	C3 L1	31.5606
85	74	C3 S1	29.5758	29.4047	0.128019	0.0686817		1.86395
86	74	C3 S1	29.2337
87	75	C3 F1	26.025	26.1056	1.01035	21.4503		0.0471021
88	75	C3 F1	26.1861
89	76	C3 L2	31.9884	31.7635	0.02923	12.3286		0.00237091
90	76	C3 L2	31.5386
91	77	C3 S2	29.2653	29.6587	0.109198	1.87385		0.0582749
92	77	C3 S2	30.0521
93	78	C3 F2	26.3145	26.2017	0.951319	24.5695		0.0387196
94	78	C3 F2	26.0889
95	79	C3 L3	31.5594	31.2858	0.039423	18.7469		0.0021029
96	79	C3 L3	31.0121
Plate Name: Jennie OB Periphery TGFB1 Plate1 11.13.14												18s
Detector	Reporter		Start		Threshold							std1	5	17.0779
18S Mouse	VIC		3	3	0.2							std2	0.5	21.1411
Well	SampleName		Ct	average CT	x for 18s							std3	0.05	24.6765
1	S1		17.3946	17.0779	4.31893							std4	0.005	28.3956
2	S1		16.7612									std5	0.0005	34.1199
3	1	OBSD1 L1	13.8714	13.8093	26.6811
4	1	OBSD1 L1	13.7472
5	2	OBSD1 S1	13.695	13.671	28.8189
6	2	OBSD1 S1	13.6469
7	3	OBSD1 F1	13.5257	13.5113	31.4995
8	3	OBSD1 F1	13.4969
9	4	OBSD1 L2	13.6727	13.6852	28.5902
10	4	OBSD1 L2	13.6978
11	5	OBSD1 S2	14.2159	14.2147	21.2866
12	5	OBSD1 S2	14.2136
13	S2		21.6259	21.1411	0.449054
14	S2		20.6563
15	6	OBSD1 F2	15.5143	15.4457	10.7222
16	6	OBSD1 F2	15.3771
17	7	OBC1 L1	15.1223	15.0695	13.2218
18	7	OBC1 L1	15.0168
19	8	OBC1 S1	17.3523	17.0663	4.34706
20	8	OBC1 S1	16.7802
21	9	OBC1 F1	14.3888	14.4108	19.0847
22	9	OBC1 F1	14.4327
23	10	OBC1 L2	14.0038	14.0442	23.409
24	10	OBC1 L2	14.0845
25	S3		24.8702	24.6765	0.062648
26	S3		24.4829
27	11	OBC1 S2	18.9373	18.8335	1.62411
28	11	OBC1 S2	18.7297
29	12	OBC1 F2	13.6961	13.6613	28.9742
30	12	OBC1 F2	13.6265
31	25	OBSD2 L5	16.4671	16.4231	6.22001
32	25	OBSD2 L5	16.3792
33	26	OBSD2 S5	15.931	15.8702	8.46376
34	26	OBSD2 S5	15.8095
35	27	OBSD2 F5	13.9228	13.9219	25.0581
36	27	OBSD2 F5	13.9211
37	S4		29.001	28.3956	0.00789011
38	S4		27.7903
39	28	OBC2 L5	14.1003	14.0088	23.8746
40	28	OBC2 L5	13.9173
41	29	OBC2 S5	13.9215	13.9208	25.0735
42	29	OBC2 S5	13.9202
43	30	OBC2 F5	14.1175	13.9495	24.6765
44	30	OBC2 F5	13.7815
45	31	OBC2 L6	13.5921	13.4964	31.7621
46	31	OBC2 L6	13.4007
47	32	OBC2 S6	16.7531	16.4079	6.27308
48	32	OBC2 S6	16.0627
49	S5		33.9956	34.1199	0.000325177
50	S5		34.2442
51	33	OBC2 F6	13.9879	13.7812	27.1028
52	33	OBC2 F6	13.5744
53	34	OBC2 L7	13.8899	13.7566	27.4768
54	34	OBC2 L7	13.6232
55	35	OBC2 S7	15.4558	15.5208	10.2828
56	35	OBC2 S7	15.5858
57	36	OBC2 F7	13.7673	13.7446	27.6611
58	36	OBC2 F7	13.7218
59	61	C2 L1	24.9286	24.6797	0.0625382
60	61	C2 L1	24.4308
61	50	C2 S1	16.8942	16.6125	5.59714
62	50	C2 S1	16.3309
63	51	C2 F1	14.7051	14.4881	18.2803
64	51	C2 F1	14.271
65	52	C2 L2	14.6454	14.4209	18.9776
66	52	C2 L2	14.1963
67	53	C2 S2	17.0266	16.713	5.29238
68	53	C2 S2	16.3995
69	54	C2 F2	13.9119	13.7087	28.2183
70	54	C2 F2	13.5056
71	55	C2 L3	14.2657	14.205	21.4025
72	55	C2 L3	14.1443
73	56	C2 S3	20.5049	20.434	0.665835
74	56	C2 S3	20.3632
75	57	C2 F3	15.5494	15.5841	9.92651
76	57	C2 F3	15.6188
77	58	C2 L4	14.8044	14.6331	16.8612
78	58	C2 L4	14.4618
79	59	C2 S4	26.1302	26.053	0.0290983
80	59	C2 S4	25.9759
81	60	C2 F4	15.082	14.8246	15.1554
82	60	C2 F4	14.5671
83	73	C3 L1	17.4851	17.3954	3.61885
84	73	C3 L1	17.3056
85	74	C3 S1	24.8466	24.5115	0.0686817
86	74	C3 S1	24.1764
87	75	C3 F1	14.2434	14.201	21.4503
88	75	C3 F1	14.1586
89	76	C3 L2	15.1944	15.1951	12.3286
90	76	C3 L2	15.1958
91	77	C3 S2	18.5101	18.5768	1.87385
92	77	C3 S2	18.6434
93	78	C3 F2	14.0235	13.9573	24.5695
94	78	C3 F2	13.8911
95	79	C3 L3	14.7819	14.4428	18.7469
96	79	C3 L3	14.1037
Plate Name: Jennie OB Periphery TGFB1 Plate2 11.14.14												TGFB
Detector	Reporter		Start		Threshold							std1	5	24.3456
Tgfb1- Mouse	FAM		3	3	0.2							std2	0.5	28.0979
Well	SampleName		Ct	average CT	x for TGFB	x for 18s		relative expression				std3	0.05	31.6408
1	S1		24.6015	24.3456	4.91975	6.26063		0.785823				std4	0.005	35.6273
2	S1		24.0896									std5	0.0005
3	13	OBC1 L3	34.4371	34.3447	0.0104221	4.15222		0.00251002
4	13	OBC1 L3	34.2522
5	14	OBC1 S3	30.1159	30.0932	0.142849	1.04614		0.136548
6	14	OBC1 S3	30.0706
7	15	OBC1 F3	30.8975	30.8993	0.086963	0.0973362		0.89343
8	15	OBC1 F3	30.901
9	16	OBC1 L4	33.155	33.4552	0.0180231	2.10775		0.00855084
10	16	OBC1 L4	33.7553
11	17	OBC1 S4	27.2665	27.3113	0.792198	5.93156		0.133556
12	17	OBC1 S4	27.3561
13	S2		28.8531	28.0979	0.488082	0.486706		1.00283
14	S2		27.3426
15	18	OBC1 F4	25.9946	25.8324	1.96936	45.1937		0.043576
16	18	OBC1 F4	25.6702
17	19	OBSD2 L3	29.3862	29.2924	0.233907	22.7901		0.0102635
18	19	OBSD2 L3	29.1986
19	20	OBSD2 S3	24.5683	24.4803	4.52801	51.3562		0.0881687
20	20	OBSD2 S3	24.3923
21	21	OBSD2 F3	25.4544	25.4505	2.49154	75.2992		0.0330885
22	21	OBSD2 F3	25.4465
23	22	OBSD2 L4	28.8831	28.844	0.308278	56.0098		0.00550399
24	22	OBSD2 L4	28.805
25	S3		32.0005	31.6408	0.0550859	0.0416348		1.32307
26	S3		31.281
27	23	OBSD2 S4	25.8669	25.7987	2.01066	30.8707		0.0651315
28	23	OBSD2 S4	25.7305
29	24	OBSD2 F4	25.8045	25.7446	2.07876	67.0559		0.0310004
30	24	OBSD2 F4	25.6847
31	37	SD1 L1	30.2706	30.27	0.128122	13.4165		0.00954958
32	37	SD1 L1	30.2693
33	38	SD1 S1	27.7435	27.7322	0.611349	14.0181		0.0436113
34	38	SD1 S1	27.7208
35	39	SD1 F1	27.3071	27.3528	0.772235	38.0748		0.020282
36	39	SD1 F1	27.3984
37	S4		36.0005	35.6273	0.00473108	0.00318085		1.48736
38	S4		35.254
39	40	SD1 L2	31.4895	31.4256	0.0628912	27.0815		0.0023223
40	40	SD1 L2	31.3616
41	41	SD1 S2				0.00113497		0
42	41	SD1 S2
43	42	SD1 F2	28.4422	28.4468	0.393697	7.66192		0.0513836
44	42	SD1 F2	28.4515
45	43	SD1 L3	32.2434	31.9938	0.0443228	50.0666		0.000885276
46	43	SD1 L3	31.7442
47	44	SD1 S3	27.1448	27.1426	0.878918	22.0284		0.0398993
48	44	SD1 S3	27.1404
49	S5					0.000772944		0
50	S5
51	45	SD1 F3	26.6033	26.3296	1.44998	47.3775		0.0306049
52	45	SD1 F3	26.0559
53	46	SD1 L4	30.81	30.6403	0.101996	49.3189		0.0020681
54	46	SD1 L4	30.4706
55	47	SD1 S4				0.0116027		0
56	47	SD1 S4
57	48	SD1 F4	27.6554	27.5951	0.665201	58.9474		0.0112847
58	48	SD1 F4	27.5347
59	49	SD3 L1	31.4151	31.3947	0.0640974	56.0295		0.00114399
60	49	SD3 L1	31.3743
61	62	SD3 S1	30.5456	30.4422	0.115229	0.279132		0.41281
62	62	SD3 S1	30.3388
63	63	SD3 F1	27.9787	27.8153	0.580835	0.795194		0.730432
64	63	SD3 F1	27.6519
65	64	SD3 L2	31.1464	30.8058	0.0921139	18.1185		0.00508397
66	64	SD3 L2	30.4652
67	65	SD3 S2	29.1319	29.6489	0.187811	1.61417		0.116352
68	65	SD3 S2	30.1658
69	66	SD3 F2	29.8061	29.8026	0.170846	9.68218		0.0176454
70	66	SD3 F2	29.7991
71	67	SD3 L3	30.5843	30.5202	0.109822	49.5875		0.00221471
72	67	SD3 L3	30.4562
73	68	SD3 S3	31.9217	31.9428	0.0457382	0.321489		0.14227
74	68	SD3 S3	31.9638
75	69	SD3 F3	29.4761	29.3627	0.223997	0.380795		0.588237
76	69	SD3 F3	29.2493
77	70	SD3 L4				0.00237715		0
78	70	SD3 L4
79	71	SD3 S4	28.7238	28.4085	0.403117	6.01534		0.0670148
80	71	SD3 S4	28.0931
81	72	SD3 F4	31.7691	31.5264	0.0591045	0.0292189		2.02282
82	72	SD3 F4	31.2837
83	80	C3 S3	32.0807	32.1962	0.0391304	1.14855		0.0340694
84	80	C3 S3	32.3116
85	81	C3 F3	26.7994	26.7418	1.12494	44.5387		0.0252577
86	81	C3 F3	26.6842
87	82	C3 L4	36.2216	36.2844	0.00315653	19.0322		0.000165852
88	82	C3 L4	36.3473
89	83	C3 S4	26.4425	26.3738	1.41105	40.978		0.0344344
90	83	C3 S4	26.3051
91	84	C3 F4	27.8529	27.7488	0.605132	33.506		0.0180604
92	84	C3 F4	27.6446
Plate Name: Jennie OB Periphery TGFB1 Plate2 11.14.14												18s
Detector	Reporter		Start		Threshold							std1	5	19.3963
18S Mouse	VIC		3	3	0.2							std2	0.5	23.394
Well	SampleName		Ct	average CT	x for 18s							std3	0.05	27.2418
1	S1		19.7317	19.3963	6.26063							std4	0.005	31.2667
2	S1		19.061									std5	0.0005	33.4807
3	13	OBC1 L3	20.0556	20.039	4.15222
4	13	OBC1 L3	20.0224
5	14	OBC1 S3	22.1694	22.1964	1.04614
6	14	OBC1 S3	22.2234
7	15	OBC1 F3	25.9885	25.9128	0.0973362
8	15	OBC1 F3	25.8371
9	16	OBC1 L4	21.163	21.1001	2.10775
10	16	OBC1 L4	21.0372
11	17	OBC1 S4	19.5259	19.4809	5.93156
12	17	OBC1 S4	19.4358
13	S2		24.1108	23.394	0.486706
14	S2		22.6771
15	18	OBC1 F4	16.4124	16.3028	45.1937
16	18	OBC1 F4	16.1933
17	19	OBSD2 L3	17.4286	17.3743	22.7901
18	19	OBSD2 L3	17.32
19	20	OBSD2 S3	16.2161	16.1028	51.3562
20	20	OBSD2 S3	15.9895
21	21	OBSD2 F3	15.4489	15.5039	75.2992
22	21	OBSD2 F3	15.5589
23	22	OBSD2 L4	15.861	15.9671	56.0098
24	22	OBSD2 L4	16.0731
25	S3		27.4553	27.2418	0.0416348
26	S3		27.0284
27	23	OBSD2 S4	16.9836	16.8993	30.8707
28	23	OBSD2 S4	16.8151
29	24	OBSD2 F4	15.6818	15.6853	67.0559
30	24	OBSD2 F4	15.6889
31	37	SD1 L1	18.1332	18.2035	13.4165
32	37	SD1 L1	18.2738
33	38	SD1 S1	18.2396	18.1349	14.0181
34	38	SD1 S1	18.0301
35	39	SD1 F1	16.5346	16.5711	38.0748
36	39	SD1 F1	16.6076
37	S4		31.3984	31.2667	0.00318085
38	S4		31.135
39	40	SD1 L2	17.1663	17.1043	27.0815
40	40	SD1 L2	17.0423
41	41	SD1 S2	33.4006	32.8795	0.00113497
42	41	SD1 S2	32.3584
43	42	SD1 F2	19.1703	19.0802	7.66192
44	42	SD1 F2	18.9902
45	43	SD1 L3	16.1958	16.1426	50.0666
46	43	SD1 L3	16.0894
47	44	SD1 S3	17.5053	17.4275	22.0284
48	44	SD1 S3	17.3497
49	S5		32.9091	33.4807	0.000772944
50	S5		34.0523
51	45	SD1 F3	16.3574	16.229	47.3775
52	45	SD1 F3	16.1006
53	46	SD1 L4	16.2923	16.1662	49.3189
54	46	SD1 L4	16.04
55	47	SD1 S4	29.4217	29.2415	0.0116027
56	47	SD1 S4	29.0612
57	48	SD1 F4	15.9051	15.887	58.9474
58	48	SD1 F4	15.869
59	49	SD3 L1	15.9746	15.9665	56.0295
60	49	SD3 L1	15.9584
61	62	SD3 S1	24.2931	24.264	0.279132
62	62	SD3 S1	24.235
63	63	SD3 F1	22.6904	22.6257	0.795194
64	63	SD3 F1	22.5609
65	64	SD3 L2	17.8201	17.7333	18.1185
66	64	SD3 L2	17.6465
67	65	SD3 S2	20.2294	21.5176	1.61417
68	65	SD3 S2	22.8059
69	66	SD3 F2	18.7864	18.714	9.68218
70	66	SD3 F2	18.6416
71	67	SD3 L3	16.1152	16.1577	49.5875
72	67	SD3 L3	16.2001
73	68	SD3 S3	24.0316	24.043	0.321489
74	68	SD3 S3	24.0543
75	69	SD3 F3	23.8915	23.778	0.380795
76	69	SD3 F3	23.6645
77	70	SD3 L4	31.9578	31.7225	0.00237715
78	70	SD3 L4	31.4872
79	71	SD3 S4	19.7484	19.4589	6.01534
80	71	SD3 S4	19.1694
81	72	SD3 F4	28.0199	27.7961	0.0292189
82	72	SD3 F4	27.5722
83	80	C3 S3	21.978	22.0502	1.14855
84	80	C3 S3	22.1225
85	81	C3 F3	16.4491	16.3257	44.5387
86	81	C3 F3	16.2023
87	82	C3 L4	17.6362	17.6563	19.0322
88	82	C3 L4	17.6764
89	83	C3 S4	16.3647	16.4561	40.978
90	83	C3 S4	16.5475
91	84	C3 F4	16.672	16.7711	33.506
92	84	C3 F4	16.8703
Plate Name: Jennie OB TGFB1 Brain and Periphery Plate3 12.4.14												TGFB
Detector	Reporter		Start		Threshold							std1	5	27.0689
Tgfb1- Mouse	FAM		3	3	0.2							std2	0.5	30.4967
Well	SampleName		Ct	average CT	x for TFGB	x for 18s		relative expression				std3	0.05	33.4963
1	S1		27.7232	27.0689	4.90076	4.86469		1.00741				std4	0.005	37.2865
2	S1		26.4146									std5	0.0005
3	85	OBSD3 L7	29.3784	28.7127	1.59085	47.2105		0.033697
4	85	OBSD3 L7	28.047
5	86	OBSD3 S7	24.9686	24.365	31.1904	46.3176		0.673403
6	86	OBSD3 S7	23.7614
7	87	OBSD3 F7	24.5271	23.9935	40.2209	60.0039		0.670305
8	87	OBSD3 F7	23.4599
9	88	OBSD3 L8	28.2227	27.8946	2.78505	60.5282		0.0460124
10	88	OBSD3 L8	27.5664
11	89	OBSD3 S8	23.7895	23.528	55.3128	62.8332		0.880312
12	89	OBSD3 S8	23.2665
13	S2		31.0836	30.4967	0.469144	0.692576		0.67739
14	S2		29.9099
15	90	OBSD3 L9	36.7756	36.1788	0.00959964	0.101183		0.0948744
16	90	OBSD3 L9	35.5821
17	91	OBSD3 S9	28.9264	28.5816	1.74015	3.94738		0.440836
18	91	OBSD3 S9	28.2369
19	92	OBSD3 F9	26.1066	26.0512	9.83521	68.8248		0.142902
20	92	OBSD3 F9	25.9958
21	93	OBC3 L8	29.671	29.3861	1.00336	54.3142		0.0184732
22	93	OBC3 L8	29.1012
23	94	OBC3 S8	25.8613	25.577	13.6064	27.5902		0.49316
24	94	OBC3 S8	25.2927
25	S3		33.6639	33.4963	0.0602075	0.0324421		1.85584
26	S3		33.3288
27	95	OBC3 F8	24.1248	24.0211	39.4682	74.8169		0.527531
28	95	OBC3 F8	23.9174
29	96	OBC3 L9	29.3136	29.1806	1.15494	40.9252		0.0282207
30	96	OBC3 L9	29.0475
31	97	OBC3 S9	25.9842	25.4489	14.8528	12.0334		1.23429
32	97	OBC3 S9	24.9137
33	98	OBC3 F9	24.3417	23.8458	44.4997	70.9583		0.627125
34	98	OBC3 F9	23.3499
35	99	OBSD3 F8	24.3224	24.2227	34.38	35.5425		0.967293
36	99	OBSD3 F8	24.1231
37	S4		37.6477	37.2865	0.00449792	0.0049775		0.903649
38	S4		36.9252
49	S5			37.6434	0.00352294	0.000574417		6.13306
50	S5		37.6434
Plate Name: Jennie OB TGFB1 Brain and Periphery Plate3 12.4.14												18s
Detector	Reporter		Start		Threshold							std1	5	17.1435
18S Mouse	VIC		3		0.2							std2	0.5	20.2468
Well	SampleName		Ct	average Ct	x for 18s							std3	0.05	25.1198
1	S1		17.5571	17.1435	4.86469							std4	0.005	28.1041
2	S1		16.7298									std5	0.0005	31.5418
3	85	OBSD3 L7	13.9577	13.5254	47.2105
4	85	OBSD3 L7	13.0932
5	86	OBSD3 S7	14.0086	13.5558	46.3176
6	86	OBSD3 S7	13.1031
7	87	OBSD3 F7	13.4662	13.1437	60.0039
8	87	OBSD3 F7	12.8212
9	88	OBSD3 L8	13.3471	13.1298	60.5282
10	88	OBSD3 L8	12.9126
11	89	OBSD3 S8	13.1768	13.0704	62.8332
12	89	OBSD3 S8	12.9639
13	S2		20.8743	20.2468	0.692576
14	S2		19.6193
15	90	OBSD3 L9	23.7467	23.309	0.101183
16	90	OBSD3 L9	22.8713
17	91	OBSD3 S9	17.7677	17.4761	3.94738
18	91	OBSD3 S9	17.1845
19	92	OBSD3 F9	13.1376	12.9254	68.8248
20	92	OBSD3 F9	12.7131
21	93	OBC3 L8	13.4637	13.3023	54.3142
22	93	OBC3 L8	13.1409
23	94	OBC3 S8	14.6034	14.3806	27.5902
24	94	OBC3 S8	14.1578
25	S3		25.1895	25.1198	0.0324421
26	S3		25.0502
27	95	OBC3 F8	12.8109	12.7924	74.8169
28	95	OBC3 F8	12.774
29	96	OBC3 L9	13.9651	13.7529	40.9252
30	96	OBC3 L9	13.5407
31	97	OBC3 S9	15.9516	15.7016	12.0334
32	97	OBC3 S9	15.4516
33	98	OBC3 F9	13.053	12.8768	70.9583
34	98	OBC3 F9	12.7005
35	99	OBSD3 F8	13.9638	13.9774	35.5425
36	99	OBSD3 F8	13.991
37	S4		28.7928	28.1041	0.0049775
38	S4		27.4154
49	S5		32.0014	31.5418	0.000574417
50	S5		31.0821

## Sheet: group means
control				SD				OB control				OB SD
LIV	SPL	FAT		LIV	SPL	FAT		LIV	SPL	FAT		LIV	SPL	FAT
0.00453216	0.0700239	0.0448761		0.00954958	0.0436113	0.020282		0.00671882	0.162112	0.0741425		0.00303633	0.141881	0.12372
0.000740958	0.0404576	1.49385		0.18365	NA	0.0513836		0.0101084	0.0842683	0.0950085		0.0047756	0.120505	0.174468
0.000620324	0.194199	0.247216		0.000885276	0.774975	0.0306049		0.198574	0.136548	0.89343		0.384662	0.0881687	0.0330885
0.00339547	NA	0.027914		0.0020681	NA	0.40504		0.00855084	0.133556	0.043576		0.00550399	0.962389	0.0310004
0.00926809		0.0471021		0.00114399	0.41281	0.730432		0.00697106	0.172195	0.121411		0.00406024	0.113645	0.0593987
0.00237091	0.0582749	0.0387196		0.00508397	0.116352	0.0176454		0.0114881	0.0919896	0.0901872		NA	NA	NA
0.0021029	0.0340694	0.0252577		0.00221471	0.14227	0.588237		0.016095	0.0890121	0.073968		0.033697	0.673403	0.670305
0.000165852	0.0344344	0.0180604		NA	0.874887			0.0184732	0.49316	0.527531		0.0460124	0.880312	0.967293
								0.0282207	1.23429	0.627125		0.0948744	0.440836	0.142902
						2.02282
	1.86395
0.00289958	0.0719098	0.242874		0.0292279	0.394151	0.263375		0.0339112	0.28857	0.282931		0.0720778	0.427642	0.275272
Standard Deviation								Standard Deviation
control				SD				OB control				OB SD
0.00296916	0.0615949	0.511059		0.0681612	0.357764	0.306144		0.0621287	0.376352	0.315062		0.130239	0.366697	0.348572
Sample Size								Sample Size
8	6	8		7	6	7		9	9	9		8	8	8
Standard Error								Standard Error
0.00104976	0.025146	0.180687		0.0257625	0.146057	0.115712		0.0207096	0.125451	0.105021		0.0460465	0.129647	0.123239

## Sheet: graph
	control	HSF	OB control	OB HSF											control	HSF	OB control	OB HSF
liver	0.00289958	0.0292279	0.0339112	0.0720778										spleen	0.0719098	0.394151	0.28857	0.427642
spleen	0.0719098	0.394151	0.28857	0.427642										fat	0.242874	0.263375	0.282931	0.275272
fat	0.242874	0.263375	0.282931	0.275272
	OB control	OB HSF
liver	0.0339112	0.0720778
spleen	0.28857	0.427642
fat	0.282931	0.275272
Standard Error
	control	HSF	OB control	OB HSF
liver	0.00104976	0.0257625	0.0207096	0.0460465
spleen	0.025146	0.146057	0.125451	0.129647
fat	0.180687	0.115712	0.105021	0.123239
	liver	spleen	fat
control	0.00104976	0.025146	0.180687
HSF	0.0257625	0.146057	0.115712
Ob control	0.0207096	0.125451	0.105021
OB HSF	0.0460465	0.129647	0.123239

## Sheet: Sheet2
63	51	C2 F1	26.9816	26.4383	0.820347	18.2803		0.0448761
64	51	C2 F1	25.8949
63	51	C2 F1	14.7051	14.4881	18.2803
64	51	C2 F1	14.271
69	54	C2 F2	26.3823	20.1471	42.1539	28.2183		1.49385
69	54	C2 F2	13.9119	19.6295	1.04238
70	54	C2 F2	25.3471
70	54	C2 F2	13.5056
75	57	C2 F3	24.5051	24.6883	2.45399	9.92651		0.247216
76	57	C2 F3	24.8716
75	57	C2 F3	15.5494	15.5841	9.92651
76	57	C2 F3	15.6188
81	60	C2 F4	27.7131	27.4959	0.423048	15.1554		0.027914
82	60	C2 F4	27.2786
81	60	C2 F4	15.082	14.8246	15.1554
82	60	C2 F4	14.5671
59	61	C2 L1	39.2464	39.1671	0.000283433	0.0625382		0.00453216
60	61	C2 L1	39.0879
59	61	C2 L1	24.9286	24.6797	0.0625382
60	61	C2 L1	24.4308
65	52	C2 L2	33.5236	32.9321	0.0140616	18.9776		0.000740958
66	52	C2 L2	32.3406
65	52	C2 L2	14.6454	14.4209	18.9776
66	52	C2 L2	14.1963
71	55	C2 L3	33.2213	33.0238	0.0132765	21.4025		0.000620324
72	55	C2 L3	32.8264
71	55	C2 L3	14.2657	14.205	21.4025
72	55	C2 L3	14.1443
77	58	C2 L4	31.0263	30.6899	0.0572515	16.8612		0.00339547
78	58	C2 L4	30.3535
77	58	C2 L4	14.8044	14.6331	16.8612
78	58	C2 L4	14.4618
61	50	C2 S1	27.9153	27.6178	0.391934	5.59714		0.0700239
62	50	C2 S1	27.3204
61	50	C2 S1	16.8942	16.6125	5.59714
62	50	C2 S1	16.3309
67	53	C2 S2	28.9859	28.5834	0.214117	5.29238		0.0404576
68	53	C2 S2	28.1808
67	53	C2 S2	17.0266	16.713	5.29238
68	53	C2 S2	16.3995
73	56	C2 S3	29.5354	29.3888	0.129304	0.665835		0.194199
74	56	C2 S3	29.2422
73	56	C2 S3	20.5049	20.434	0.665835
74	56	C2 S3	20.3632
79	59	C2 S4				0.0290983		0
80	59	C2 S4
79	59	C2 S4	26.1302	26.053	0.0290983
80	59	C2 S4	25.9759
87	75	C3 F1	26.025	26.1056	1.01035	21.4503		0.0471021
88	75	C3 F1	26.1861
87	75	C3 F1	14.2434	14.201	21.4503
88	75	C3 F1	14.1586
93	78	C3 F2	26.3145	26.2017	0.951319	24.5695		0.0387196
94	78	C3 F2	26.0889
93	78	C3 F2	14.0235	13.9573	24.5695
94	78	C3 F2	13.8911
85	81	C3 F3	26.7994	26.7418	1.12494	44.5387		0.0252577
86	81	C3 F3	26.6842
85	81	C3 F3	16.4491	16.3257	44.5387
86	81	C3 F3	16.2023
91	84	C3 F4	27.8529	27.7488	0.605132	33.506		0.0180604
92	84	C3 F4	27.6446
91	84	C3 F4	16.672	16.7711	33.506
92	84	C3 F4	16.8703
83	73	C3 L1	31.5271	31.5438	0.0335398	3.61885		0.00926809
84	73	C3 L1	31.5606
83	73	C3 L1	17.4851	17.3954	3.61885
84	73	C3 L1	17.3056
89	76	C3 L2	31.9884	31.7635	0.02923	12.3286		0.00237091
90	76	C3 L2	31.5386
89	76	C3 L2	15.1944	15.1951	12.3286
90	76	C3 L2	15.1958
95	79	C3 L3	31.5594	31.2858	0.039423	18.7469		0.0021029
96	79	C3 L3	31.0121
95	79	C3 L3	14.7819	14.4428	18.7469
96	79	C3 L3	14.1037
87	82	C3 L4	36.2216	36.2844	0.00315653	19.0322		0.000165852
88	82	C3 L4	36.3473
87	82	C3 L4	17.6362	17.6563	19.0322
88	82	C3 L4	17.6764
85	74	C3 S1	29.5758	29.4047	0.128019	0.0686817		1.86395
86	74	C3 S1	29.2337
85	74	C3 S1	24.8466	24.5115	0.0686817
86	74	C3 S1	24.1764
91	77	C3 S2	29.2653	29.6587	0.109198	1.87385		0.0582749
92	77	C3 S2	30.0521
91	77	C3 S2	18.5101	18.5768	1.87385
92	77	C3 S2	18.6434
83	80	C3 S3	32.0807	32.1962	0.0391304	1.14855		0.0340694
84	80	C3 S3	32.3116
83	80	C3 S3	21.978	22.0502	1.14855
84	80	C3 S3	22.1225
89	83	C3 S4	26.4425	26.3738	1.41105	40.978		0.0344344
90	83	C3 S4	26.3051
89	83	C3 S4	16.3647	16.4561	40.978
90	83	C3 S4	16.5475
21	9	OBC1 F1	25.722	25.5677	1.41499	19.0847		0.0741425
22	9	OBC1 F1	25.4133
21	9	OBC1 F1	14.3888	14.4108	19.0847
22	9	OBC1 F1	14.4327
29	12	OBC1 F2	24.5606	24.5049	2.7528	28.9742		0.0950085
30	12	OBC1 F2	24.4491
29	12	OBC1 F2	13.6961	13.6613	28.9742
30	12	OBC1 F2	13.6265
7	15	OBC1 F3	30.8975	30.8993	0.086963	0.0973362		0.89343
8	15	OBC1 F3	30.901
7	15	OBC1 F3	25.9885	25.9128	0.0973362
8	15	OBC1 F3	25.8371
15	18	OBC1 F4	25.9946	25.8324	1.96936	45.1937		0.043576
16	18	OBC1 F4	25.6702
15	18	OBC1 F4	16.4124	16.3028	45.1937
16	18	OBC1 F4	16.1933
17	7	OBC1 L1	30.0779	29.9883	0.0888348	13.2218		0.00671882
18	7	OBC1 L1	29.8987
17	7	OBC1 L1	15.1223	15.0695	13.2218
18	7	OBC1 L1	15.0168
23	10	OBC1 L2	28.5489	28.4237	0.236628	23.409		0.0101084
24	10	OBC1 L2	28.2985
23	10	OBC1 L2	14.0038	14.0442	23.409
24	10	OBC1 L2	14.0845
3	13	OBC1 L3	34.4371	27.2463	0.824524	4.15222		0.198574
3	13	OBC1 L3	20.0556	27.1539	0.0440416
4	13	OBC1 L3	34.2522
4	13	OBC1 L3	20.0224
9	16	OBC1 L4	33.155	33.4552	0.0180231	2.10775		0.00855084
10	16	OBC1 L4	33.7553
9	16	OBC1 L4	21.163	21.1001	2.10775
10	16	OBC1 L4	21.0372
19	8	OBC1 S1	26.7819	26.6809	0.70471	4.34706		0.162112
20	8	OBC1 S1	26.5799
19	8	OBC1 S1	17.3523	17.0663	4.34706
20	8	OBC1 S1	16.7802
27	11	OBC1 S2	29.31	29.2981	0.136861	1.62411		0.0842683
28	11	OBC1 S2	29.2862
27	11	OBC1 S2	18.9373	18.8335	1.62411
28	11	OBC1 S2	18.7297
5	14	OBC1 S3	30.1159	30.0932	0.142849	1.04614		0.136548
6	14	OBC1 S3	30.0706
5	14	OBC1 S3	22.1694	22.1964	1.04614
6	14	OBC1 S3	22.2234
11	17	OBC1 S4	27.2665	27.3113	0.792198	5.93156		0.133556
12	17	OBC1 S4	27.3561
11	17	OBC1 S4	19.5259	19.4809	5.93156
12	17	OBC1 S4	19.4358
43	30	OBC2 F5	24.6454	24.3697	2.99599	24.6765		0.121411
44	30	OBC2 F5	24.0939
43	30	OBC2 F5	14.1175	13.9495	24.6765
44	30	OBC2 F5	13.7815
51	33	OBC2 F6	25.0906	24.6946	2.44433	27.1028		0.0901872
52	33	OBC2 F6	24.2987
51	33	OBC2 F6	13.9879	13.7812	27.1028
52	33	OBC2 F6	13.5744
57	36	OBC2 F7	25.0009	24.9787	2.04604	27.6611		0.073968
58	36	OBC2 F7	24.9565
57	36	OBC2 F7	13.7673	13.7446	27.6611
58	36	OBC2 F7	13.7218
39	28	OBC2 L5	29.1714	28.9857	0.166431	23.8746		0.00697106
40	28	OBC2 L5	28.8
39	28	OBC2 L5	14.1003	14.0088	23.8746
40	28	OBC2 L5	13.9173
45	31	OBC2 L6	27.9737	27.7321	0.364886	31.7621		0.0114881
46	31	OBC2 L6	27.4904
45	31	OBC2 L6	13.5921	13.4964	31.7621
46	31	OBC2 L6	13.4007
53	34	OBC2 L7	27.7591	27.425	0.442239	27.4768		0.016095
54	34	OBC2 L7	27.0909
53	34	OBC2 L7	13.8899	13.7566	27.4768
54	34	OBC2 L7	13.6232
41	29	OBC2 S5	23.8289	23.7861	4.31752	25.0735		0.172195
42	29	OBC2 S5	23.7433
41	29	OBC2 S5	13.9215	13.9208	25.0735
42	29	OBC2 S5	13.9202
47	32	OBC2 S6	27.5318	27.0001	0.577058	6.27308		0.0919896
48	32	OBC2 S6	26.4683
47	32	OBC2 S6	16.7531	16.4079	6.27308
48	32	OBC2 S6	16.0627
55	35	OBC2 S7	26.1082	26.2634	0.915294	10.2828		0.0890121
56	35	OBC2 S7	26.4185
55	35	OBC2 S7	15.4558	15.5208	10.2828
56	35	OBC2 S7	15.5858
27	95	OBC3 F8	26.1018	25.9029	7.8706	0.0293622		268.052
28	95	OBC3 F8	25.704
27	95	OBC3 F8	25.9725	25.8153	0.0293622
28	95	OBC3 F8	25.6581
33	98	OBC3 F9	25.848	25.7841	8.50292	0.0324225		262.254
34	98	OBC3 F9	25.7201
33	98	OBC3 F9	25.6824	25.6534	0.0324225
34	98	OBC3 F9	25.6244
21	93	OBC3 L8	30.6791	30.2567	0.464101	0.0308336		15.0518
22	93	OBC3 L8	29.8342
21	93	OBC3 L8	25.8379	25.7355	0.0308336
22	93	OBC3 L8	25.633
29	96	OBC3 L9				0.0122391		0
30	96	OBC3 L9
29	96	OBC3 L9	27.3473	27.2443	0.0122391
30	96	OBC3 L9	27.1413
23	94	OBC3 S8	26.7761	26.9625	3.95186	0.230392		17.1528
24	94	OBC3 S8	27.1489
23	94	OBC3 S8	22.4349	22.4512	0.230392
24	94	OBC3 S8	22.4675
31	97	OBC3 S9	28.0098	27.6296	2.56103	0.254732		10.0538
32	97	OBC3 S9	27.2495
31	97	OBC3 S9	22.491	22.2872	0.254732
32	97	OBC3 S9	22.0834
7	3	OBSD1 F1	24.0867	23.9497	3.89712	31.4995		0.12372
8	3	OBSD1 F1	23.8127
7	3	OBSD1 F1	13.5257	13.5113	31.4995
8	3	OBSD1 F1	13.4969
15	6	OBSD1 F2	25.1879	25.1218	1.87067	10.7222		0.174468
16	6	OBSD1 F2	25.0557
15	6	OBSD1 F2	15.5143	15.4457	10.7222
16	6	OBSD1 F2	15.3771
3	1	OBSD1 L1	30.2069	30.1355	0.0810127	26.6811		0.00303633
4	1	OBSD1 L1	30.0641
3	1	OBSD1 L1	13.8714	13.8093	26.6811
4	1	OBSD1 L1	13.7472
9	4	OBSD1 L2	29.2839	29.3019	0.136535	28.5902		0.0047756
10	4	OBSD1 L2	29.3199
9	4	OBSD1 L2	13.6727	13.6852	28.5902
10	4	OBSD1 L2	13.6978
5	2	OBSD1 S1	23.9914	23.873	4.08886	28.8189		0.141881
6	2	OBSD1 S1	23.7546
5	2	OBSD1 S1	13.695	13.671	28.8189
6	2	OBSD1 S1	13.6469
11	5	OBSD1 S2	24.4019	24.6176	2.56515	21.2866		0.120505
12	5	OBSD1 S2	24.8333
11	5	OBSD1 S2	14.2159	14.2147	21.2866
12	5	OBSD1 S2	14.2136
21	21	OBSD2 F3	25.4544	25.4505	2.49154	75.2992		0.0330885
22	21	OBSD2 F3	25.4465
21	21	OBSD2 F3	15.4489	15.5039	75.2992
22	21	OBSD2 F3	15.5589
29	24	OBSD2 F4	25.8045	25.7446	2.07876	67.0559		0.0310004
30	24	OBSD2 F4	25.6847
29	24	OBSD2 F4	15.6818	15.6853	67.0559
30	24	OBSD2 F4	15.6889
35	27	OBSD2 F5	25.4235	25.4869	1.48842	25.0581		0.0593987
36	27	OBSD2 F5	25.5502
35	27	OBSD2 F5	13.9228	13.9219	25.0581
36	27	OBSD2 F5	13.9211
18	19	OBSD2 L3	29.1986
18	19	OBSD2 L3	17.32
17	19	OBSD2 L3	29.3862	23.4074	8.76649	22.7901		0.384662
17	19	OBSD2 L3	17.4286	23.1559	0.566683
23	22	OBSD2 L4	28.8831	28.844	0.308278	56.0098		0.00550399
24	22	OBSD2 L4	28.805
23	22	OBSD2 L4	15.861	15.9671	56.0098
24	22	OBSD2 L4	16.0731
31	25	OBSD2 L5	31.9518	31.9969	0.0252547	6.22001		0.00406024
32	25	OBSD2 L5	32.0421
31	25	OBSD2 L5	16.4671	16.4231	6.22001
32	25	OBSD2 L5	16.3792
19	20	OBSD2 S3	24.5683	24.4803	4.52801	51.3562		0.0881687
20	20	OBSD2 S3	24.3923
19	20	OBSD2 S3	16.2161	16.1028	51.3562
20	20	OBSD2 S3	15.9895
27	23	OBSD2 S4	25.8669	21.4252	29.7096	30.8707		0.962389
27	23	OBSD2 S4	16.9836	21.3571	1.78861
28	23	OBSD2 S4	25.7305
28	23	OBSD2 S4	16.8151
33	26	OBSD2 S5	26.1994	26.1841	0.961861	8.46376		0.113645
34	26	OBSD2 S5	26.1688
33	26	OBSD2 S5	15.931	15.8702	8.46376
34	26	OBSD2 S5	15.8095
7	87	OBSD3 F7	26.5247	26.1414	6.7398	0.0365415		184.443
7	87	OBSD3 F7	25.7582	25.7405	0.0307375
8	87	OBSD3 F7	25.7229
8	87	OBSD3 F7	25.158
35	99	OBSD3 F8	24.3224	24.2227	23.4662	41.3109		0.568038
36	99	OBSD3 F8	24.1231
35	99	OBSD3 F8	13.9638	13.9774	41.3109
36	99	OBSD3 F8	13.991
19	92	OBSD3 F9	26.1066	26.0512	7.14712	0.0249792		286.123
20	92	OBSD3 F9	25.9958
19	92	OBSD3 F9	26.1202	26.0793	0.0249792
20	92	OBSD3 F9	26.0384
3	85	OBSD3 L7	29.8764	29.9787	0.556031	0.0243144		22.8684
4	85	OBSD3 L7	30.081
3	85	OBSD3 L7	26.1544	26.1234	0.0243144
4	85	OBSD3 L7	26.0923
9	88	OBSD3 L8	29.3784	29.1994	0.92287	0.0262342		35.1782
10	88	OBSD3 L8	29.0205
9	88	OBSD3 L8	25.9953	25.9992	0.0262342
10	88	OBSD3 L8	26.0032
15	90	OBSD3 L9	34.6391	33.5945	0.0529765	0.119709		0.442543
16	90	OBSD3 L9	32.5499
15	90	OBSD3 L9	23.6435	23.5204	0.119709
16	90	OBSD3 L9	23.3972
5	86	OBSD3 S7	25.6547	25.7388	8.7568	0.158368		55.2941
6	86	OBSD3 S7	25.8229
5	86	OBSD3 S7	23.0543	23.0633	0.158368
6	86	OBSD3 S7	23.0724
11	89	OBSD3 S8	25.4152	25.3143	11.5402	0.130865		88.1841
12	89	OBSD3 S8	25.2134
11	89	OBSD3 S8	23.4195	23.3749	0.130865
12	89	OBSD3 S8	23.3302
17	91	OBSD3 S9	30.0657	30.0525	0.529998	0.350989		1.51001
18	91	OBSD3 S9	30.0392
17	91	OBSD3 S9	21.8874	21.7638	0.350989
18	91	OBSD3 S9	21.6401
35	39	SD1 F1	27.3071	27.3528	0.772235	38.0748		0.020282
36	39	SD1 F1	27.3984
35	39	SD1 F1	16.5346	16.5711	38.0748
36	39	SD1 F1	16.6076
43	42	SD1 F2	28.4422	28.4468	0.393697	7.66192		0.0513836
44	42	SD1 F2	28.4515
43	42	SD1 F2	19.1703	19.0802	7.66192
44	42	SD1 F2	18.9902
51	45	SD1 F3	26.6033	26.3296	1.44998	47.3775		0.0306049
52	45	SD1 F3	26.0559
51	45	SD1 F3	16.3574	16.229	47.3775
52	45	SD1 F3	16.1006
57	48	SD1 F4	27.6554	21.7802	23.876	58.9474		0.40504
57	48	SD1 F4	15.9051	21.7199	1.41848
58	48	SD1 F4	27.5347
58	48	SD1 F4	15.869
31	37	SD1 L1	30.2706	30.27	0.128122	13.4165		0.00954958
32	37	SD1 L1	30.2693
31	37	SD1 L1	18.1332	18.2035	13.4165
32	37	SD1 L1	18.2738
40	40	SD1 L2	31.3616
40	40	SD1 L2	17.0423
39	40	SD1 L2	31.4895	24.3279	4.97351	27.0815		0.18365
39	40	SD1 L2	17.1663	24.7049	0.210613
45	43	SD1 L3	32.2434	31.9938	0.0443228	50.0666		0.000885276
46	43	SD1 L3	31.7442
45	43	SD1 L3	16.1958	16.1426	50.0666
46	43	SD1 L3	16.0894
53	46	SD1 L4	30.81	30.6403	0.101996	49.3189		0.0020681
54	46	SD1 L4	30.4706
53	46	SD1 L4	16.2923	16.1662	49.3189
54	46	SD1 L4	16.04
33	38	SD1 S1	27.7435	27.7322	0.611349	14.0181		0.0436113
34	38	SD1 S1	27.7208
33	38	SD1 S1	18.2396	18.1349	14.0181
34	38	SD1 S1	18.0301
41	41	SD1 S2				0.00113497		0
42	41	SD1 S2
41	41	SD1 S2	33.4006	32.8795	0.00113497
42	41	SD1 S2	32.3584
47	44	SD1 S3	27.1448	22.325	17.0715	22.0284		0.774975
47	44	SD1 S3	17.5053	22.3228	0.964942
48	44	SD1 S3	27.1404
48	44	SD1 S3	17.3497
55	47	SD1 S4				0.0116027		0
56	47	SD1 S4
55	47	SD1 S4	29.4217	29.2415	0.0116027
56	47	SD1 S4	29.0612
63	63	SD3 F1	27.9787	27.8153	0.580835	0.795194		0.730432
64	63	SD3 F1	27.6519
63	63	SD3 F1	22.6904	22.6257	0.795194
64	63	SD3 F1	22.5609
69	66	SD3 F2	29.8061	29.8026	0.170846	9.68218		0.0176454
70	66	SD3 F2	29.7991
69	66	SD3 F2	18.7864	18.714	9.68218
70	66	SD3 F2	18.6416
75	69	SD3 F3	29.4761	29.3627	0.223997	0.380795		0.588237
76	69	SD3 F3	29.2493
75	69	SD3 F3	23.8915	23.778	0.380795
76	69	SD3 F3	23.6645
81	72	SD3 F4	31.7691	31.5264	0.0591045	0.0292189		2.02282
82	72	SD3 F4	31.2837
81	72	SD3 F4	28.0199	27.7961	0.0292189
82	72	SD3 F4	27.5722
59	49	SD3 L1	31.4151	31.3947	0.0640974	56.0295		0.00114399
60	49	SD3 L1	31.3743
59	49	SD3 L1	15.9746	15.9665	56.0295
60	49	SD3 L1	15.9584
65	64	SD3 L2	31.1464	30.8058	0.0921139	18.1185		0.00508397
66	64	SD3 L2	30.4652
65	64	SD3 L2	17.8201	17.7333	18.1185
66	64	SD3 L2	17.6465
71	67	SD3 L3	30.5843	30.5202	0.109822	49.5875		0.00221471
72	67	SD3 L3	30.4562
71	67	SD3 L3	16.1152	16.1577	49.5875
72	67	SD3 L3	16.2001
77	70	SD3 L4				0.00237715		0
78	70	SD3 L4
77	70	SD3 L4	31.9578	31.7225	0.00237715
78	70	SD3 L4	31.4872
61	62	SD3 S1	30.5456	30.4422	0.115229	0.279132		0.41281
62	62	SD3 S1	30.3388
61	62	SD3 S1	24.2931	24.264	0.279132
62	62	SD3 S1	24.235
67	65	SD3 S2	29.1319	29.6489	0.187811	1.61417		0.116352
68	65	SD3 S2	30.1658
67	65	SD3 S2	20.2294	21.5176	1.61417
68	65	SD3 S2	22.8059
73	68	SD3 S3	31.9217	31.9428	0.0457382	0.321489		0.14227
74	68	SD3 S3	31.9638
73	68	SD3 S3	24.0316	24.043	0.321489
74	68	SD3 S3	24.0543
79	71	SD3 S4	28.7238	24.2361	5.26274	6.01534		0.874887
79	71	SD3 S4	19.7484	23.9207	0.347598
80	71	SD3 S4	28.0931
80	71	SD3 S4	19.1694
Plate Name: Jennie OB Periphery TGFB1 Plate1 11.13.14
Detector	Reporter		Start	End	Threshold
Tgfb1- Mouse	FAM		3	15	0.2
Well	SampleName		Ct	average CT	x for TFGB	x for 18s		relative expression
1	S1		23.9148	23.5945	4.86802	4.31893		1.12713
2	S1		23.2741
13	S2		27.838	27.2444	0.495188	0.449054		1.10274
14	S2		26.6508
25	S3		31.0819	30.7456	0.0552909	0.062648		0.882564
26	S3		30.4092
37	S4		35.0925	34.6877	0.00468392	0.00789011		0.593645
38	S4		34.2829
49	S5					0.000325177		0
50	S5
Plate Name: Jennie OB Periphery TGFB1 Plate1 11.13.14
Detector	Reporter		Start		Threshold
18S Mouse	VIC		3	3	0.2
Well	SampleName		Ct	average CT	x for 18s
1	S1		17.3946	17.0779	4.31893
2	S1		16.7612
13	S2		21.6259	21.1411	0.449054
14	S2		20.6563
25	S3		24.8702	24.6765	0.062648
26	S3		24.4829
37	S4		29.001	28.3956	0.00789011
38	S4		27.7903
49	S5		33.9956	34.1199	0.000325177
50	S5		34.2442
Plate Name: Jennie OB Periphery TGFB1 Plate2 11.14.14
Detector	Reporter		Start		Threshold
Tgfb1- Mouse	FAM		3	3	0.2
Well	SampleName		Ct	average CT	x for TGFB	x for 18s		relative expression
1	S1		24.6015	24.3456	4.91975	6.26063		0.785823
2	S1		24.0896
13	S2		28.8531	28.0979	0.488082	0.486706		1.00283
14	S2		27.3426
25	S3		32.0005	31.6408	0.0550859	0.0416348		1.32307
26	S3		31.281
37	S4		36.0005	35.6273	0.00473108	0.00318085		1.48736
38	S4		35.254
49	S5					0.000772944		0
50	S5
Plate Name: Jennie OB Periphery TGFB1 Plate2 11.14.14
Detector	Reporter		Start		Threshold
18S Mouse	VIC		3	3	0.2
Well	SampleName		Ct	average CT	x for 18s
1	S1		19.7317	19.3963	6.26063
2	S1		19.061
13	S2		24.1108	23.394	0.486706
14	S2		22.6771
25	S3		27.4553	27.2418	0.0416348
26	S3		27.0284
37	S4		31.3984	31.2667	0.00318085
38	S4		31.135
49	S5		32.9091	33.4807	0.000772944
50	S5		34.0523
Plate Name: Jennie OB TGFB1 Brain and Periphery Plate3 12.4.14
Detector	Reporter		Start		Threshold
Tgfb1- Mouse	FAM		3	3	0.2
Well	SampleName		Ct	average CT	x for TFGB	x for 18s		relative expression
1	S1		26.3098	26.7259	4.60921	4.69707		0.981295
2	S1		27.1419
13	S2		30.1155	29.8623	0.599727	0.65302		0.91839
14	S2		29.6092
25	S3		34.0286	33.8702	0.0442825	0.0373983		1.18408
26	S3		33.7118
37	S4		36.8095	37.1928	0.00510516	0.0051479		0.991699
38	S4		37.5761
49	S5			37.6434	0.00380865	0.000529099		7.19837
50	S5		37.6434
Plate Name: Jennie OB TGFB1 Brain and Periphery Plate3 12.4.14
Detector	Reporter		Start		Threshold
18S Mouse	VIC		3		0.2
Well	SampleName		Ct	average Ct	x for 18s
1	S1		17.8151	17.5279	4.69707
2	S1		17.2406
13	S2		20.8051	20.7499	0.65302
14	S2		20.6947
25	S3		25.7497	25.4203	0.0373983
26	S3		25.0908
37	S4		29.289	28.6585	0.0051479
38	S4		28.0281
49	S5		33.1963	32.3739	0.000529099
50	S5		31.5515
